# Supplementary material for: The Human Diets &amp; Microbiome Initiative: A five-country analysis of geographic and dietary drivers of gut microbiome composition and genomic variation
Source: Research Square preprint supplement (doi:10.21203/rs.3.rs-8436332/v1), 2026-02-06
Supplement: Supplementary file 1 [file d7bcaa48a75e1214492ef16b.xlsx]

## Sheet: Table 1 Demographics
Parameter	Japan	Mexico	Spain	UK	US	Statistic	Q-value
No. of participants	410 (20.7%)	397 (20.1%)	450 (22.8%)	308 (15.6%)	411 (20.8%)
Age	47.549 ± 9.449	41.987 ± 15.198	42.567 ± 6.612	52.149 ± 13.260	45.009 ± 15.202	160.013	4.84e-33
BMI	21.731 ± 3.556	25.654 ± 5.083	23.417 ± 4.753	25.083 ± 5.698	25.232 ± 5.308	204.476	2.05e-42
Sex: Female	354 (86.3%)	269 (67.8%)	374 (83.1%)	223 (72.4%)	262 (63.7%)	83.886	4.36e-17
Unhealthy	151 (36.8%)	212 (53.4%)	251 (55.8%)	195 (63.3%)	249 (60.6%)	66.958	1.24e-13
Bowel Movement Quality: Normal	245 (61.3%)	301 (77.8%)	235 (55.6%)	219 (75.3%)	300 (76.5%)	74.516	3.6e-15
Antibiotic History: Within the Last Month	38 (13.1%)	47 (19.0%)	38 (12.8%)	11 (4.3%)	11 (3.8%)	34.445	6.04e-07
Types of Plants: More than 30	32 (14.8%)	17 (7.2%)	19 (8.8%)	53 (55.2%)	57 (32.0%)	61.227	1.78e-12
Types of Plants: Less than 10	184 (85.2%)	220 (92.8%)	197 (91.2%)	43 (44.8%)	121 (68.0%)	152.538	1.45e-31
Cosmetics Frequency: Daily	308 (75.1%)	50 (12.6%)	70 (15.6%)	61 (19.8%)	61 (14.8%)	580.531	2.53e-123
Exercise Frequency: Daily	33 (8.0%)	35 (8.8%)	40 (8.9%)	86 (27.9%)	79 (19.2%)	90.519	2.04e-18
Table S1. Demographics of participants

## Sheet: Table S1 FFQ Harmonization
original_field_name	Common Name (name after collapse)	units	Present_In_Vioscreen	Vioscreen Food Code	Used in sCCA/PCA Analysis	Notes
Japan
energy_kcal	calories	kcal		Nutrients	Yes	For standardization only
water	water	g		Nutrients	No
protein	protein	g		Nutrients	Yes
Lipid	fat	g		Nutrients	Yes
carbohydrates	carbo	g		Nutrients	Yes
ash	ash	g		Nutrients	No
sodium	sodium	mg		Nutrients	Yes
potassium	potass	mg		Nutrients	Yes
calcium	calcium	mg		Nutrients	Yes
magnesium	magnes	mg		Nutrients	Yes
Phosphorus	phosphor	mg		Nutrients	Yes
iron	iron	mg		Nutrients	Yes
zinc	zinc	mg		Nutrients	Yes
copper	copper	mg		Nutrients	No
manganese	mangan	mg		Nutrients	No
retinol	retinol	¬µg		Nutrients	No
retinol equivalent	vita_re	¬µg		Nutrients	No
Vitamin D	vitd	¬µg		Nutrients	Yes
Vitamin K	vitk	¬µg		Nutrients	No
Vitamin B1	thiamin	mg		Nutrients	Yes
Vitamin B2	ribofla	mg		Nutrients	Yes
Niacin	niacineq	mg		Nutrients	Yes
Vitamin B6	vitb6	mg		Nutrients	Yes
Vitamin B12	vitb12	¬µg		Nutrients	Yes
folic acid	totfolat	¬µg		Nutrients	Yes
Pantothenic acid	pantothe	mg		Nutrients	No
Vitamin C	vitc	mg		Nutrients	Yes
saturated fatty acid	sfatot	g		Nutrients	Yes
monounsaturated fatty acid	mfatot	g		Nutrients	Yes
polyunsaturated fatty acids	pfatot	g		Nutrients	Yes
cholesterol	cholest	mg		Nutrients	Yes
Soluble dietary fiber (modified Prosky method)	fibh2o	g		Nutrients	Yes
Insoluble dietary fiber (modified Prosky method)	fibinso	g		Nutrients	Yes
Total amount of dietary fiber (Prosky's modified method)	fiber	g		Nutrients	Yes
salt equivalent		g	FALSE		No
n-3 unsaturated fatty acid	omega3	g		Nutrients	No
n-6 unsaturated fatty acid		g	FALSE		No
selenium	selenium	¬µg		Nutrients	Yes
Isoflavone	Isoflavonestot	mg		Nutrients	Yes
Isoflavone	Isoflavonestot	mg		Nutrients	Yes
Isoflavone	Isoflavonestot	mg		Nutrients	Yes
Isoflavone	Isoflavonestot	mg		Nutrients	Yes
Isoflavone	Isoflavonestot	mg		Nutrients	Yes
Genistein	genistn	mg		Nutrients	No
Lycopene	lycopene	¬µg		Nutrients	No
Œ±-carotene	alphacar	¬µg		Nutrients	No
Œ≤-carotene	betacar	¬µg		Nutrients	No
Œ≤ cryptoxanthin	betacryp	¬µg		Nutrients	No
Œ≤-carotene equivalent	betacar	¬µg		Nutrients	No
alpha tocopherol	alphtoco	mg		Nutrients	No
beta tocopherol	betatoco	mg		Nutrients	No
gamma tocopherol	gammtoco	mg		Nutrients	No
delta tocopherol	delttoco	mg		Nutrients	No
Protein by amino acid composition		g	FALSE		No
triacylglycerol equivalent		g	FALSE		No
Iodine		¬µg	FALSE		No
chromium		¬µg	FALSE		No
molybdenum		¬µg	FALSE		No
biotin		¬µg	FALSE		No
ethanol	alcohol	g		Nutrients	Yes
energy_kj	joules	kJ		Nutrients	No	Used kcal
Sake	White, ros√©, muscatel and rice wine	g		90019	Yes
shochu	Liquor and mixed drinks	g		90004	Yes
Beer	Beer	g		90002	Yes
whiskey	Liquor and mixed drinks	g		90004	Yes
wine	Red Wine	g		90018	Yes
rice	Rice and pasta	g		120414	Yes
brown rice	Rice and pasta	g		120415	Yes
wheat	Quinoa, sorghum, millet or kasha (buckwheat groats)	g		120810	No
millet	Quinoa, sorghum, millet or kasha (buckwheat groats)	g		120810	No
miso soup	Soups and creams	g		40069	Yes
beef steak	Beef, pork, ham and lamb, with and without fat	g		40002	Yes
beef steak	Beef, pork, ham and lamb, with and without fat	g		40058	Yes
grilled beef	Beef, pork, ham and lamb, with and without fat	g		40002	Yes
grilled beef	Beef, pork, ham and lamb, with and without fat	g		40058	Yes
beef stir fry	Beef, pork, ham and lamb, with and without fat	g		40002	Yes
beef stir fry	Beef, pork, ham and lamb, with and without fat	g		40058	Yes
stewed beef	Beef, pork, ham and lamb, with and without fat	g		40002	Yes
stewed beef	Beef, pork, ham and lamb, with and without fat	g		40058	Yes
stir-fried pork	Beef, pork, ham and lamb, with and without fat	g		40002	Yes
stir-fried pork	Beef, pork, ham and lamb, with and without fat	g		40058	Yes
fried pork	Beef, pork, ham and lamb, with and without fat	g		40002	Yes
fried pork	Beef, pork, ham and lamb, with and without fat	g		40058	Yes
stewed pork	Beef, pork, ham and lamb, with and without fat	g		40002	Yes
stewed pork	Beef, pork, ham and lamb, with and without fat	g		40058	Yes
Simmered pork	Beef, pork, ham and lamb, with and without fat	g		40002	Yes
Simmered pork	Beef, pork, ham and lamb, with and without fat	g		40058	Yes
pork soup	Beef, pork, ham and lamb, with and without fat	g		40002	Yes
pork soup	Beef, pork, ham and lamb, with and without fat	g		40058	Yes
pork liver	Organ meats	g		40006	Yes
Grilled chicken	Chicken and turkey (roasted, stewed, grilled or broiled), with and without skin	g		40201	Yes
Grilled chicken	Chicken and turkey (roasted, stewed, grilled or broiled), with and without skin	g		40200	Yes
fried chicken	Chicken and turkey (roasted, stewed, grilled or broiled), with and without skin	g		40201	Yes
fried chicken	Chicken and turkey (roasted, stewed, grilled or broiled), with and without skin	g		40200	Yes
Simmered chicken	Chicken and turkey (roasted, stewed, grilled or broiled), with and without skin	g		40201	Yes
Simmered chicken	Chicken and turkey (roasted, stewed, grilled or broiled), with and without skin	g		40200	Yes
Deep fried chicken	Fried chicken, including chicken nuggets and tenders	g		40064	No
chicken liver	Organ meats	g		40006	Yes
Pork loin ham	Lunch meats such as ham, turkey and lowfat bologna	g		40028	Yes
wiener sausage	Processed meats	g		40030	Yes
wiener sausage	Processed meats	g		40062	Yes
bacon	Bacon and breakfast sausage	g		50005	Yes
bacon	Bacon and breakfast sausage	g		120763	Yes
Luncheon meat	Lunch meats such as ham, turkey and lowfat bologna	g		40028	Yes
low fat milk	Low and nonfat milk	g		70009	Yes
low fat milk	Low and nonfat milk	g		70009	Yes
low fat milk	Low and nonfat milk	g		70009	Yes
low fat milk	Low and nonfat milk	g		70009	Yes
low fat milk	Low and nonfat milk	g		70009	Yes
low fat milk	Low and nonfat milk	g		70009	Yes
low fat milk	Low and nonfat milk	g		70009	Yes
low fat milk	Low and nonfat milk	g		70009	Yes
low fat milk	Low and nonfat milk	g		70010	Yes
low fat milk	Low and nonfat milk	g		70010	Yes
low fat milk	Low and nonfat milk	g		70010	Yes
low fat milk	Low and nonfat milk	g		70010	Yes
low fat milk	Low and nonfat milk	g		70010	Yes
low fat milk	Low and nonfat milk	g		70010	Yes
low fat milk	Low and nonfat milk	g		70010	Yes
low fat milk	Low and nonfat milk	g		70010	Yes
whole milk	Whole milk	g		70008	Yes
whole milk	Whole milk	g		70008	Yes
whole milk	Whole milk	g		70008	Yes
whole milk	Whole milk	g		70008	Yes
whole milk	Whole milk	g		70008	Yes
whole milk	Whole milk	g		70008	Yes
whole milk	Whole milk	g		70008	Yes
whole milk	Whole milk	g		70008	Yes
egg	Eggs	g		50004	Yes
Cheese	Cheese	g		120702	Yes
Cheese	Cheese	g		120703	Yes
Cheese	Cheese	g		120704	Yes
Cheese	Cheese	g		120717	Yes
Cheese	Cheese	g		120718	Yes
Cheese	Cheese	g		70005	Yes
yogurt	Yogurt	g		120705	Yes
yogurt	Yogurt	g		120708	Yes
yogurt	Yogurt	g		120711	Yes
yogurt	Yogurt	g		120714	Yes
yogurt	Yogurt	g		120706	Yes
yogurt	Yogurt	g		120707	Yes
yogurt	Yogurt	g		120709	Yes
yogurt	Yogurt	g		120710	Yes
yogurt	Yogurt	g		120712	Yes
yogurt	Yogurt	g		120713	Yes
yogurt	Yogurt	g		120715	Yes
yogurt	Yogurt	g		120716	Yes
Salt cod, salted mackerel, salted salmon	White fish such as sole, halibut, snapper and cod	g		40073	Yes
dried fish	Dried fish (charalitos, cod)	g		120861	No
Canned tuna	Canned fish and shellfish (sardines, anchovies, bonito, tuna)	g		40063	Yes
Canned tuna	Canned fish and shellfish (sardines, anchovies, bonito, tuna)	g		40064	Yes
Salmon	Dark fish such as salmon, mackerel and bluefish	g		40074	Yes
Bonito	Dark fish such as salmon, mackerel and bluefish	g		40074	Yes
yellowtail	Dark fish such as salmon, mackerel and bluefish	g		40074	Yes
cod	White fish such as sole, halibut, snapper and cod	g		40073	Yes
sea bream	White fish such as sole, halibut, snapper and cod	g		40074	Yes
taste	Canned fish and shellfish (sardines, anchovies, bonito, tuna)	g		40063	Yes
taste	Canned fish and shellfish (sardines, anchovies, bonito, tuna)	g		40064	Yes
Pacific saury	Dark fish such as salmon, mackerel and bluefish	g		40074	Yes
dried and salted baby sardine	Dried fish (charalitos, cod)	g		120861	No
Cod roe, salmon roe, salmon roe		g	FALSE		No
eel		g	FALSE		No
squid		g	FALSE		No
Octopus		g	FALSE		No
Shrimp	Shellfish (shrimp, lobster, crab and oysters, clams, mussels, snails)	g		40078	Yes
clams	Shellfish (shrimp, lobster, crab and oysters, clams, mussels, snails)	g		40078	Yes
pond snails	Shellfish (shrimp, lobster, crab and oysters, clams, mussels, snails)	g		40078	Yes
Chikuwa	White fish such as sole, halibut, snapper and cod	g		40073	Yes
Kamaboko	White fish such as sole, halibut, snapper and cod	g		40073	Yes
Satsuma-age	Fried fish, fish sandwich and fried shellfish (shrimp, oysters)	g		120163	No
Carrot	Carrots and winter squash	g		30040	Yes
Carrot	Carrots and winter squash	g		30041	Yes
Spinach	Leafy greens	g		30021	Yes
pumpkin	Carrots and winter squash	g		30047	Yes
Cabbage	Cruciferous vegetables	g		30018	Yes
Radish	Cruciferous vegetables	g		30018	Yes
Pickled radish	Sauerkraut, kimchi or pickled vegetables (unpasteurized and raw)	g		120837	Yes
pickled green leaves	Sauerkraut, kimchi or pickled vegetables (unpasteurized and raw)	g		120837	Yes
Pickled Umeboshi plum	Sauerkraut, kimchi or pickled vegetables (unpasteurized and raw)	g		120837	Yes
Pickled Chinese cabbage	Sauerkraut, kimchi or pickled vegetables (unpasteurized and raw)	g		120837	Yes
pickled cucumber	Sauerkraut, kimchi or pickled vegetables (unpasteurized and raw)	g		120837	Yes
pickled eggplant	Sauerkraut, kimchi or pickled vegetables (unpasteurized and raw)	g		120837	Yes
pickled turnip	Sauerkraut, kimchi or pickled vegetables (unpasteurized and raw)	g		120837	Yes
green pepper	Peppers cooked and raw	g		30054	Yes
green pepper	Peppers cooked and raw	g		30055	Yes
tomato	Fresh tomatoes	g		30008	Yes
welsh onion	Onions and leeks	g		30019	Yes
Green onion, Wake onion	Onions and leeks	g		30019	Yes
chives		g	FALSE		No
garland chrysanthemum		g	FALSE		No
Komatsuna	Leafy greens	g		30021	Yes
Broccoli	Cruciferous vegetables	g		30012	Yes
onion	Onions and leeks	g		30019	Yes
Cucumber	Summer squash, zucchini, eggplants, cucumbers	g		30046	Yes
eggplant	Summer squash, zucchini, eggplants, cucumbers	g		30047	Yes
Chinese cabbage	Cruciferous vegetables	g		30018	Yes
Burdock		g	FALSE		No
bean sprouts		g	FALSE		No
green beans	Green or string beans	g		30001	Yes
lettuce	Leafy greens	g		30021	Yes
green asparagus		g	FALSE		No
garlic	Garlic	g		30043	Yes
Chingensai	Cruciferous vegetables	g		30018	Yes
Mustard	Cruciferous vegetables	g		30018	Yes
bitter melon		g	FALSE		No
Swiss chard	Cooked greens, such as spinach, swiss chard and beet greens	g		120438	No
Loofah	Summer squash, zucchini, eggplants, cucumbers, luffa	g		30046	Yes
Wormwood		g	FALSE		No
papaya		g	FALSE		No
mandarin orange	Oranges, grapefruit and tangerines (not juice)	g		20009	Yes
citrus	Oranges, grapefruit and tangerines (not juice)	g		20009	Yes
apple	Apples, applesauce and pears	g		20001	Yes
persimmon		g	FALSE		No
strawberry	Berries such as strawberries and blueberries	g		20021	Yes
Grape	Grapes, fresh	g		20024	Yes
melon	Cantaloupe, melon and mango (in season)	g		20022	No
Watermelon	Watermelon and red melon	g		20023	Yes
Peaches	Cherries, picotas, plums, peaches, nectarines, apricots	g		20020	Yes
none	Apples, applesauce and pears	g		20001	Yes
kiwi		g	FALSE		No
Pineapple	Pineapple, fresh and canned	g		20026	No
Banana	Bananas	g		20002	Yes
mango	Cantaloupe, melon and mango (in season)	g		20022	No
Bread	White breads, including bagels, rolls and English muffins	g		60002	Yes
Udon	Rice, pasta and noodles	g		120419	Yes
Soba	Rice, pasta and noodles	g		120419	Yes
Okinawa soba	Rice, pasta and noodles	g		120419	Yes
Ramen	Rice, pasta and noodles	g		120419	Yes
spaghetti macaroni	Rice, pasta and noodles	g		120419	Yes
Somen and hiyamugi noodles	Rice, pasta and noodles	g		120419	Yes
rice cake	Sweets and confectionery	g		80008	Yes
Japanese sweets	Sweets and confectionery	g		80015	Yes
Japanese sweets	Sweets and confectionery	g		80008	Yes
cake	Cookies and cakes	g		80005	Yes
cake	Cookies and cakes	g		80010	Yes
biscuits	Muffins, scones, croissants and biscuits	g		60028	Yes
chocolate	Chocolate, candy bars, and toffee	g		80008	No
ice cream	Ice cream and milkshakes	g		80050	Yes
Snacks (potato chips)	Potato, tortilla chips, corn chips and puffs	g		60031	Yes
Snacks (potato chips)	Potato, tortilla chips, corn chips and puffs	g		120733	Yes
Senbei rice clacker	Low or nonfat crackers, such as saltines, SnackWell's, rice crackers	g		60009	No
Sesame	Peanut butter, peanuts and other nuts and seeds	g		60011	Yes
peanuts	Peanut butter, peanuts and other nuts and seeds	g		60011	Yes
Tofu	Tofu	g		120206	No
Simmered tofu	Tofu	g		120206	No
Yushi tofu	Tofu	g		120206	No
Koya-tofu freeze dried tofu	Tofu	g		120206	No
Namaage / Deep fried tofu	Tofu	g		120206	No
Aburaage/deep fried tofu	Tofu	g		120206	No
natto		g	FALSE		Yes
sweet potato	Yams, sweet potatoes and taro	g		30048	No
potatoes	Potatoes	g		30026	Yes
Satoimo	Yams, sweet potatoes and taro	g		30048	No
Yamaimo and Chinese yam	Yams, sweet potatoes and taro	g		30048	No
Konjac	Yams, sweet potatoes and taro	g		30048	No
Shiitake mushrooms	Mushrooms	g		120780	Yes
enoki mushrooms	Mushrooms	g		120780	Yes
shimeji mushrooms	Mushrooms	g		120780	Yes
wakame seaweed		g	FALSE		No
Hijiki seaweed		g	FALSE		No
Nori seaweed		g	FALSE		No
Butter	Butter or ghee	g		10004	Yes
Butter	Butter or ghee	g		10004	Yes
Butter	Butter or ghee	g		10004	Yes
Butter	Butter or ghee	g		10004	Yes
Butter	Butter or ghee	g		10004	Yes
Butter	Butter or ghee	g		10014	Yes
Butter	Butter or ghee	g		10014	Yes
Butter	Butter or ghee	g		10014	Yes
Butter	Butter or ghee	g		10014	Yes
Margarine	Margarine	g		10001	Yes
Margarine	Margarine	g		10001	Yes
Margarine	Margarine	g		10001	Yes
Margarine	Margarine	g		10001	Yes
Margarine	Margarine	g		10001	Yes
Margarine	Margarine	g		10002	Yes
Margarine	Margarine	g		10002	Yes
Margarine	Margarine	g		10002	Yes
Margarine	Margarine	g		10002	Yes
Margarine	Margarine	g		10002	Yes
Margarine	Margarine	g		10003	Yes
Margarine	Margarine	g		10003	Yes
Margarine	Margarine	g		10003	Yes
Margarine	Margarine	g		10003	Yes
Margarine	Margarine	g		10003	Yes
jam	Jam, jelly, honey, syrup or sugar on bread, pancakes or waffles	g		60037	Yes
honey	Jam, jelly, honey, syrup or sugar on bread, pancakes or waffles	g		60037	Yes
Dressing	Dressing	g		120752	No
Dressing	Dressing	g		120753	No
Mayonnaise	Mayonnaise	g		60012	Yes
Mayonnaise	Mayonnaise	g		60013	Yes
Mayonnaise	Mayonnaise	g		60014	Yes
worcester sauce	Soy sauce, tamari, teriyaki sauce, Szechwan sauce, worcester sauce	g		120227	No
Tomato ketchup	Ketchup	g		60026	Yes
Mustard	Mustard	g		120811	No
wasabi		g	FALSE		No
red pepper	Peppers cooked and raw	g		30056	Yes
red pepper	Peppers cooked and raw	g		30057	Yes
ginger		g	FALSE		No
Kinako/Soy bean powder		g	FALSE		No
green tea	Tea	g		120473	Yes
Japanese tea (cans, PET bottles)	Sweet tea and bottled sweetened tea drinks	g		120541	No
oolong tea	Tea	g		120473	Yes
Oolong tea (can, plastic bottle)	Sweet tea and bottled sweetened tea drinks	g		120541	No
black tea	Tea	g		120473	Yes
Black tea (can, plastic bottle)	Sweet tea and bottled sweetened tea drinks	g		120541	No
coffee	Coffee	g		90008	Yes
coffee	Coffee	g		90008	Yes
coffee	Coffee	g		120737	Yes
coffee (instant)	Coffee	g		90008	Yes
canned coffee		g	FALSE		No
tomato juice	Commercial fruit juices	g		90028	Yes
Vegetable juice	Commercial fruit juices	g		90028	Yes
orange juice	100% orange juice and grapefruit juice	g		90011	Yes
apple juice	100% fruit juice such as apple, grape and cranberry	g		90013	Yes
100% grapefruit juice	100% orange juice and grapefruit juice	g		90011	Yes
Fruit drinks (not 100%)	Commercial fruit juices	g		120829	Yes
Fruit drinks (not 100%)	Commercial fruit juices	g		120839	Yes
Carbonated drink	Regular soft drinks (not diet)	g		90051	Yes
soy milk	Soy milk, regular and low fat	g		120204	No
soy milk	Soy milk, regular and low fat	g		120204	No
soy milk	Soy milk, regular and low fat	g		120204	No
soy milk	Soy milk, regular and low fat	g		120204	No
soy milk	Soy milk, regular and low fat	g		120204	No
soy milk	Soy milk, regular and low fat	g		120204	No
soy milk	Soy milk, regular and low fat	g		120204	No
soy milk	Soy milk, regular and low fat	g		120204	No
soy milk	Soy milk, nonfat	g		120205	No
soy milk	Soy milk, nonfat	g		120205	No
soy milk	Soy milk, nonfat	g		120205	No
soy milk	Soy milk, nonfat	g		120205	No
soy milk	Soy milk, nonfat	g		120205	No
soy milk	Soy milk, nonfat	g		120205	No
soy milk	Soy milk, nonfat	g		120205	No
soy milk	Soy milk, nonfat	g		120205	No
Yakult		g	FALSE		No
Tap water	Water (tap or bottled)	g		90017	No
commercial water	Water (tap or bottled)	g		90018	No
tea sugar	Sugar	g		60037	No
black tea milk	Whole milk	g		70008	Yes
coffee sugar	Sugar	g		60037	No
coffee milk	Whole milk	g		70008	Yes
Cooking oil (g/d)	Corn, soybean, peanut, sesame and sunflower oil	g		10007	Yes
cooking salt	Salt	g		10100	Yes
noodle soup	Soups and creams	g		40069	Yes
Formulated oil		g	FALSE		No
safflower oil	Corn, soybean, peanut, sesame and sunflower oil	g		10007	Yes
corn oil	Corn, soybean, peanut, sesame and sunflower oil	g		10007	Yes
soybean oil	Corn, soybean, peanut, sesame and sunflower oil	g		10007	Yes
Rapeseed oil, canola oil	Corn, soybean, peanut, sesame and sunflower oil	g		10007	Yes
olive oil	Oil, olive	g		10010	Yes
olive oil	Oil, olive	g		10010	Yes
olive oil	Oil, olive	g		10010	Yes
olive oil	Oil, olive	g		10010	Yes
olive oil	Oil, olive	g		10010	Yes
olive oil	Oil, olive	g		10010	Yes
olive oil	Oil, olive	g		10010	Yes
olive oil	Oil, olive	g		10010	Yes
olive oil	Oil, olive	g		10010	Yes
olive oil	Oil, olive	g		10010	Yes
others		g	FALSE		No
cereals		g	FALSE		No
potatoes		g	FALSE		No
sugar and sweeteners		g	FALSE		No
beans		g	FALSE		No
nuts and seeds		g	FALSE		No
vegetables		g	FALSE		No
Pickles		g	FALSE		No
Green and yellow vegetables		g	FALSE		No
Other vegetables		g	FALSE		No
fruits		g	FALSE		No
mushrooms		g	FALSE		No
algae		g	FALSE		No
seafood		g	FALSE		No
meat		g	FALSE		No
eggs		g	FALSE		No
milk		g	FALSE		No
Fats and oils		g	FALSE		No
Confectionery		g	FALSE		No
alcoholic beverage		g	FALSE		No
Favorite beverages		g	FALSE		No
seasonings and spices		g	FALSE		No
water_beverage		g	FALSE		No
juice		g	FALSE		No
Spain
Energy(Kcal)	calories	kcal	TRUE	Nutrients	Yes	For standardization only
Carbohydrates(g)	carbo	g	TRUE	Nutrients	Yes
Total protein(gr)	protein	gr	TRUE	Nutrients	Yes
Total fats (g)	fat	g	TRUE	Nutrients	Yes
Monounsaturated fats (MUFA) (g)	mfatot	g	TRUE	Nutrients	Yes
Linolenic acid (ALA)	pfa183n3	g	TRUE	Nutrients	No
Eicosapentaenoic Acid (EPA) (mg)	PFA205	mg	TRUE	Nutrients	No
Docohexaenoic acid (DHA) (mg)	pfa226	mg	TRUE	Nutrients	No
linoleic acid (LA)	pfa182	g	TRUE	Nutrients	No
Polyunsaturated fats (PUFA) (g)	pfatot	g	TRUE	Nutrients	Yes
Saturated fats (SFA) (g)	sfatot	g	TRUE	Nutrients	Yes
Cholesterol (mg)	cholest	mg	TRUE	Nutrients	Yes
Animal protein (g)	protanim	g	TRUE	Nutrients	No
Vegetable protein (g)	protveg	g	TRUE	Nutrients	No
Polysacchares (g)		g	FALSE	Nutrients	No
Intrinsic sugars (g)		g	FALSE	Nutrients	No
Fructose (g)	fructose	g	TRUE	Nutrients	No
Glucose (g)	glucose	g	TRUE	Nutrients	No
Sucrose (g)	sucrose	g	TRUE	Nutrients	No
Maltose (g)	maltose	g	TRUE	Nutrients	No
Galactose (g)	galactose	g	TRUE	Nutrients	No
Lactose (g)	lactose	g	TRUE	Nutrients	No
Total fiber (g)	fiber	g	TRUE	Nutrients	Yes
Soluble fiber(g)	fibh2o	g	TRUE	Nutrients	Yes
Insoluble fiber (g)	fibinso	g	TRUE	Nutrients	Yes
Iodine (¬µg)		ug	TRUE	Nutrients	No
Sodium (mg)	sodium	mg	TRUE	Nutrients	Yes
Potassium (mg)	potass	mg	TRUE	Nutrients	Yes
Calcium (mg)	calcium	mg	TRUE	Nutrients	Yes
Magnesium (mg)	magnes	mg	TRUE	Nutrients	Yes
Phosphorus (mg)	phosphor	mg	TRUE	Nutrients	Yes
Iron (mg)	iron	mg	TRUE	Nutrients	Yes
Zinc (mg)	zinc	mg	TRUE	Nutrients	Yes
Selenium (¬µg)	selenium	ug	TRUE	Nutrients	Yes
Vitamin B1 (mg)	thiamin	mg	TRUE	Nutrients	Yes
Vitamin B2 (mg)	ribofla	mg	TRUE	Nutrients	Yes
Vitamin B6 (mg)	vitb6	mg	TRUE	Nutrients	Yes
Vitamin B12 (¬µg)	vitb12	ug	TRUE	Nutrients	Yes
Vitamin B9 (¬µg)	totfolat	ug	TRUE	Nutrients	Yes
Vitamin B3 (mg)	niacineq	mg	TRUE	Nutrients	Yes
Vitamin C (mg)	vitc	mg	TRUE	Nutrients	Yes
Vitamin A (¬µg)	vita_rae	ug	TRUE	Nutrients	No
Vitamin D (¬µg)	vitd	ug	TRUE	Nutrients	Yes
Vitamin E (mg)	alphtoce	mg	TRUE	Nutrients	No
Flavonoids		mg	FALSE	Nutrients	No
Flavonones/Flavones		mg	FALSE	Nutrients	No
flavonols		mg	FALSE	Nutrients	No
Flavanones		mg	FALSE	Nutrients	No
Isoflavones	Isoflavonestot	mg	TRUE	Nutrients	Yes
Isoflavones	Isoflavonestot	mg	TRUE	Nutrients	Yes
Isoflavones	Isoflavonestot	mg	TRUE	Nutrients	Yes
Isoflavones	Isoflavonestot	mg	TRUE	Nutrients	Yes
Isoflavones	Isoflavonestot	mg	TRUE	Nutrients	Yes
Daidzein	daidzein	mg	TRUE	Nutrients	No
Quercetin		mg	FALSE	Nutrients	No
Epicatechin Gallate		mg	FALSE	Nutrients	No
antacionines		mg	FALSE	Nutrients	No
Stilbenos		mg	FALSE	Nutrients	No
Resveratrol		mg	FALSE	Nutrients	No
lignin	ligtot	mg	TRUE	Nutrients	No
felonic acid		mg	FALSE	Nutrients	No
Other polyphenols		mg	FALSE	Nutrients	No
Total polyphenols (mg)		mg	FALSE	Nutrients	No
Caffeine (mg)	caffeine	mg	TRUE	Nutrients	No
Choline (mg)	choline	mg	TRUE	Nutrients	No
Lutein and zeaxanthins (mg)	lutzeax	mg	TRUE	Nutrients	No
Lycopene (mg)	lycopene	mg	TRUE	Nutrients	Yes
Water (ml)	water	ml	TRUE	Nutrients	No
Ethanol (g)	alcohol	ml	TRUE	Nutrients	Yes
Whole milk (1 cup, 200ml)	Whole milk	ml	TRUE	70008	Yes
Whole milk (1 cup, 200ml)	Whole milk	ml	TRUE	70008	Yes
Whole milk (1 cup, 200ml)	Whole milk	ml	TRUE	70008	Yes
Whole milk (1 cup, 200ml)	Whole milk	ml	TRUE	70008	Yes
Whole milk (1 cup, 200ml)	Whole milk	ml	TRUE	70008	Yes
Whole milk (1 cup, 200ml)	Whole milk	ml	TRUE	70008	Yes
Whole milk (1 cup, 200ml)	Whole milk	ml	TRUE	70008	Yes
Whole milk (1 cup, 200ml)	Whole milk	ml	TRUE	70008	Yes
Semi-skimmed milk (1 cup, 200ml)	Low and nonfat milk	ml	TRUE	70009	Yes
Semi-skimmed milk (1 cup, 200ml)	Low and nonfat milk	ml	TRUE	70009	Yes
Semi-skimmed milk (1 cup, 200ml)	Low and nonfat milk	ml	TRUE	70009	Yes
Semi-skimmed milk (1 cup, 200ml)	Low and nonfat milk	ml	TRUE	70009	Yes
Semi-skimmed milk (1 cup, 200ml)	Low and nonfat milk	ml	TRUE	70009	Yes
Semi-skimmed milk (1 cup, 200ml)	Low and nonfat milk	ml	TRUE	70009	Yes
Semi-skimmed milk (1 cup, 200ml)	Low and nonfat milk	ml	TRUE	70009	Yes
Semi-skimmed milk (1 cup, 200ml)	Low and nonfat milk	ml	TRUE	70009	Yes
Semi-skimmed milk (1 cup, 200ml)	Low and nonfat milk	ml	TRUE	70010	Yes
Semi-skimmed milk (1 cup, 200ml)	Low and nonfat milk	ml	TRUE	70010	Yes
Semi-skimmed milk (1 cup, 200ml)	Low and nonfat milk	ml	TRUE	70010	Yes
Semi-skimmed milk (1 cup, 200ml)	Low and nonfat milk	ml	TRUE	70010	Yes
Semi-skimmed milk (1 cup, 200ml)	Low and nonfat milk	ml	TRUE	70010	Yes
Semi-skimmed milk (1 cup, 200ml)	Low and nonfat milk	ml	TRUE	70010	Yes
Semi-skimmed milk (1 cup, 200ml)	Low and nonfat milk	ml	TRUE	70010	Yes
Semi-skimmed milk (1 cup, 200ml)	Low and nonfat milk	ml	TRUE	70010	Yes
skimmed milk (1 cup, 200ml)	Low and nonfat milk	ml	TRUE	70011	Yes
skimmed milk (1 cup, 200ml)	Low and nonfat milk	ml	TRUE	70011	Yes
skimmed milk (1 cup, 200ml)	Low and nonfat milk	ml	TRUE	70011	Yes
skimmed milk (1 cup, 200ml)	Low and nonfat milk	ml	TRUE	70011	Yes
skimmed milk (1 cup, 200ml)	Low and nonfat milk	ml	TRUE	70011	Yes
skimmed milk (1 cup, 200ml)	Low and nonfat milk	ml	TRUE	70011	Yes
skimmed milk (1 cup, 200ml)	Low and nonfat milk	ml	TRUE	70011	Yes
skimmed milk (1 cup, 200ml)	Low and nonfat milk	ml	TRUE	70011	Yes
Condensed milk (1 dessertspoon)			FALSE		No
Cream or evaporated milk (1/2 cup)			FALSE		No
Milk shakes(1 glass, 200ml)	Ice cream and milkshakes	g	TRUE	80050	Yes
Milk shakes(1 glass, 200ml)	Ice cream and milkshakes	g	TRUE	120831	Yes
Milk shakes(1 glass, 200ml)	Ice cream and milkshakes	g	TRUE	120832	Yes
Whole yogurt(1, 125gr)	Yogurt	g	TRUE	120705	Yes
Whole yogurt(1, 125gr)	Yogurt	g	TRUE	120708	Yes
Whole yogurt(1, 125gr)	Yogurt	g	TRUE	120711	Yes
Whole yogurt(1, 125gr)	Yogurt	g	TRUE	120714	Yes
Skimmed yogurt (125gr)	Yogurt	g	TRUE	120706	Yes
Skimmed yogurt (125gr)	Yogurt	g	TRUE	120707	Yes
Skimmed yogurt (125gr)	Yogurt	g	TRUE	120709	Yes
Skimmed yogurt (125gr)	Yogurt	g	TRUE	120710	Yes
Skimmed yogurt (125gr)	Yogurt	g	TRUE	120712	Yes
Skimmed yogurt (125gr)	Yogurt	g	TRUE	120713	Yes
Skimmed yogurt (125gr)	Yogurt	g	TRUE	120715	Yes
Skimmed yogurt (125gr)	Yogurt	g	TRUE	120716	Yes
Petit suite (125gr)	Cheese	g	TRUE	120717	Yes
Cottage cheese or curd(1/2 cup)	Cheese	g	TRUE	120702	Yes
Cottage cheese or curd(1/2 cup)	Cheese	g	TRUE	120703	Yes
Cottage cheese or curd(1/2 cup)	Cheese	g	TRUE	120704	Yes
Portioned or creamy cheese (125gr portion)	Cheese	g	TRUE	120717	Yes
Portioned or creamy cheese (125gr portion)	Cheese	g	TRUE	120718	Yes
Other cheeses: cured, semi-cured (Manchego, Bola, Cheddar, Emmental) (50gr)	Cheese	g	TRUE	70005	Yes
White or fresh cheese (Burgo, goat...) (50gr)	Cheese	g	TRUE	120717	Yes
Homemade or commercial custard, flan, pudding	Pudding, custard and flan	g	TRUE	80002	No
Ice cream (1 cone or tub)	Ice cream and milkshakes	g	TRUE	80050	Yes
eggs	Eggs	g	TRUE	50004	Yes
. Chicken or turkey WITH skin (1 portion or piece)	Chicken and turkey (roasted, stewed, grilled or broiled), with and without skin	g	TRUE	40201	Yes
Chicken or turkey WITHOUT skin (1 portion or piece)	Chicken and turkey (roasted, stewed, grilled or broiled), with and without skin	g	TRUE	40200	Yes
Roast veal or beef (1 portion)	Beef, pork, ham and lamb, with and without fat	g	TRUE	40002	Yes
Roast veal or beef (1 portion)	Beef, pork, ham and lamb, with and without fat	g	TRUE	40058	Yes
Generic pork (1 portion)	Beef, pork, ham and lamb, with and without fat	g	TRUE	40002	Yes
Generic pork (1 portion)	Beef, pork, ham and lamb, with and without fat	g	TRUE	40058	Yes
Generic lamb (1 portion)	Beef, pork, ham and lamb, with and without fat	g	TRUE	40002	Yes
Generic lamb (1 portion)	Beef, pork, ham and lamb, with and without fat	g	TRUE	40058	Yes
Rabbit or hare (1 portion)		g	FALSE		No
Liver (beef, pork, chicken) (1 portion)	Organ meats	g	TRUE	40006	Yes
Other viscera (brains, heart, gizzards) (1 portion)	Organ meats	g	TRUE	40006	Yes
Serrano ham or shoulder (1 slice, 30gr)		g	FALSE		No
York ham, cooked ham ( 1 slice, 30gr)	Lunch meats such as ham, turkey and lowfat bologna	g	TRUE	40028	Yes
Processed meats (sausage, chorizo, black pudding, mortadella, sausages, botifarra and sobrasada) (50gr)	Processed meats	g	TRUE	40030	Yes
Processed meats (sausage, chorizo, black pudding, mortadella, sausages, botifarra and sobrasada) (50gr)	Processed meats	g	TRUE	40062	Yes
28. Pat√©s, foie-gr√°s (25gr)	Organ meats	g	TRUE	40006	Yes
Hamburger (1, 50gr)	Ground meat	g	TRUE	40001	No
Hamburger (1, 50gr)	Ground meat	g	TRUE	40040	No
Hamburger (1, 50gr)	Ground meat	g	TRUE	40041	No
Hamburger (1, 50gr)	Ground meat	g	TRUE	40042	No
Bacon, bacon and pancetta (50gr)	Bacon and breakfast sausage	g	TRUE	50005	Yes
Bacon, bacon and pancetta (50gr)	Bacon and breakfast sausage	g	TRUE	120763	Yes
White fish (1 portion or piece)	White fish such as sole, halibut, snapper and cod	g	TRUE	40073	Yes
Blue fish (1 portion or piece)	Dark fish such as salmon, mackerel and bluefish	g	TRUE	40074	Yes
Salted fish (cod, salted fish (1 serving, 60 gr)	White fish such as sole, halibut, snapper and cod	g	TRUE	40073	Yes
Oysters, clams, mussels and the like (6 units)	Shellfish (shrimp, lobster, crab and oysters, clams, mussels, snails)	g	TRUE	40078	Yes
Squid, octopus, cuttlefish, cuttlefish (1 serving, 200gr)		g	FALSE		No
rustaceans: prawns , prawns, langoustines and the like (4-5 pieces, 200gr)	Shellfish (shrimp, lobster, crab and oysters, clams, mussels, snails)	g	TRUE	40078	Yes
Naturally canned fish and shellfish (sardines, anchovies, bonito, tuna) (1 small can or half a normal can, 50gr)	Canned fish and shellfish (sardines, anchovies, bonito, tuna)	g	TRUE	40063	Yes
Fish and shellfish in oil or Escabeche (sardines, anchovies, mussels, tuna, etc.) (1 small can or half a normal can, 50gr)	Canned fish and shellfish (sardines, anchovies, bonito, tuna)	g	TRUE	40064	Yes
Swiss chard, spinach (serving, 200gr)	Greens, such as spinach, swiss chard and beet greens	g	TRUE	120438	No
Cabbage, cauliflower, broccoli (serving, 200gr)	Cruciferous vegetables	g	TRUE	30012	Yes
Cabbage, cauliflower, broccoli (serving, 200gr)	Cruciferous vegetables	g	TRUE	30018	Yes
Lettuce, endive and escarole (serving, 100gr)	Leafy greens	g	TRUE	30021	Yes
Raw tomato (1, 150gr)	Fresh tomatoes	g	TRUE	30008	Yes
Carrot, pumpkin (garnish, 100gr)	Carrots and winter squash	g	TRUE	30040	Yes
Carrot, pumpkin (garnish, 100gr)	Carrots and winter squash	g	TRUE	30041	Yes
Carrot, pumpkin (garnish, 100gr)	Carrots and winter squash	g	TRUE	30047	Yes
Green beans (serving, 200gr)	Green or string beans	g	TRUE	30001	Yes
Eggplants, courgettes, cucumbers (medium 100gr)	Summer squash, zucchini, eggplants, cucumbers	g	TRUE	30046	Yes
Peppers (medium unit, 150gr)	Peppers cooked and raw	g	TRUE	30054	Yes
Peppers (medium unit, 150gr)	Peppers cooked and raw	g	TRUE	30055	Yes
Peppers (medium unit, 150gr)	Peppers cooked and raw	g	TRUE	30056	Yes
Peppers (medium unit, 150gr)	Peppers cooked and raw	g	TRUE	30057	Yes
Asparagus (serving, 200gr)		g	FALSE		No
Andalusian gazpacho (1 glass, 200ml)		g	FALSE		No
Other vegetables (artichokes, leeks, cardoons, celery) (serving, 200gr)		g	FALSE		No
Onion (half a unit) 50gr)	Onions and leeks	g	TRUE	30019	Yes
Garlic (1 clove)	Garlic	g	TRUE	30043	Yes
Parsley, thyme, bay leaf, oregano, etc. (A pinch)		g	TRUE		No
Commercial bagged potato chips (1 bag, 50gr)	Potato, tortilla chips, corn chips and puffs	g	TRUE	60031	Yes
Commercial bagged potato chips (1 bag, 50gr)	Potato, tortilla chips, corn chips and puffs	g	TRUE	120733	Yes
Homemade potato chips (1 serving or medium unit, 150gr)	Potatoes	g	TRUE	30026	Yes
Roasted or boiled potatoes (1 portion or medium unit, 150gr)	Potatoes	g	TRUE	30026	Yes
Mushrooms, chanterelles and mushrooms (portion, 200gr)	Mushrooms	g	TRUE	120780	Yes
Orange, tangerine (unit)	Oranges, grapefruit and tangerines (not juice)	g	TRUE	20009	Yes
Banana (unit )	Bananas	g	TRUE	20002	Yes
Apple or pear (unit	Apples, applesauce and pears	g	TRUE	20001	Yes
Strawberries/strawberries (6 units, 1 dessert plate)	Berries such as strawberries and blueberries	g	TRUE	20021	Yes
Cherries, picotas, plums (1 dessert plate)	Cherries, picotas, plums, peaches, nectarines, apricots	g	TRUE	20027	Yes
Peach, apricots, nectarines (unit)	Cherries, picotas, plums, peaches, nectarines, apricots	g	TRUE	20020	Yes
Watermelon (One slice, 200-250 gr)	Watermelon and red melon	g	TRUE	20023	Yes
Melon (One slice, 200-250 gr)	Cantaloupe, melon and mango (in season)	g	TRUE	20022	No
Kiwi (1 unit, 100gr)		g	FALSE		No
Grapes (One bunch, one dessert plate)	Grapes, fresh	g	TRUE	20024	Yes
Olives (10 units)		g	FALSE		No
Avocado (unit)	Avocado and guacamole	g	TRUE	30006	No
Fruits in syrup or juice (2 units)		g	FALSE		No
Dates, dried figs, raisins, prunes (150gr)	Dried fruit (other than apricots)	g	TRUE	20008	No
Almonds, peanuts, hazelnuts, pistachios, pine nuts (a handful, 30gr)	Peanut butter, peanuts and other nuts and seeds	g	TRUE	60011	Yes
Walnuts (4 peeled walnuts, 30gr)	Peanut butter, peanuts and other nuts and seeds	g	TRUE	60011	Yes
Lentils (serving, 150g cooked or 80g raw)	Legumes such as black, pinto, garbanzo and lentils	g	TRUE	120805	No
Chickpeas (serving, 150g cooked or 80g raw)	Legumes such as black, pinto, garbanzo and lentils	g	TRUE	120805	No
Peas (serving, 150g cooked or 80g raw)	Green peas	g	TRUE	30002	No
Beans (portion, 150g cooked or 80g raw)	Refried beans	g	TRUE	30050	No
White bread, sliced bread (3 slices, 75gr)	White breads, including bagels, rolls and English muffins	g	TRUE	60002	Yes
Whole bread (3 slices, 75gr)	Whole grain breads, including bagels and rolls	g	TRUE	120412	No
Whole bread (3 slices, 75gr)	Whole grain breads, including bagels and rolls	g	TRUE	120413	No
Breakfast cereals (2 tablespoons, 30gr)	Sweetened cold cereals	g	TRUE	120403	No
Cereals whole grains (muesli, oat flakes, all-bran) (2 tablespoons, 30gr)	Complete or primarily whole grain cold cereal	g	TRUE	120408	No
Ice or noddles (serving, 60 gr raw)	Rice, pasta and noodles	g	TRUE	120414	Yes
Ice or noddles (serving, 60 gr raw)	Rice, pasta and noodles	g	TRUE	120415	Yes
Pasta (noodles, macaroni, spaghetti) (serving, 60 gr raw)	Rice, pasta and noodles	g	TRUE	120419	Yes
Pizza (portion, 200gr)	Pizza	g	TRUE	120538	No
Olive oil (one tablespoon)	Oil, olive	g	TRUE	10010	Yes
Olive oil (one tablespoon)	Oil, olive	g	TRUE	10010	Yes
Olive oil (one tablespoon)	Oil, olive	g	TRUE	10010	Yes
Olive oil (one tablespoon)	Oil, olive	g	TRUE	10010	Yes
Olive oil (one tablespoon)	Oil, olive	g	TRUE	10010	Yes
Extra virgin olive oil (One tablespoon)	Oil, olive	g	TRUE	10010	Yes
Extra virgin olive oil (One tablespoon)	Oil, olive	g	TRUE	10010	Yes
Extra virgin olive oil (One tablespoon)	Oil, olive	g	TRUE	10010	Yes
Extra virgin olive oil (One tablespoon)	Oil, olive	g	TRUE	10010	Yes
Extra virgin olive oil (One tablespoon)	Oil, olive	g	TRUE	10010	Yes
Corn oil (one tablespoon)	Corn, soybean, peanut, sesame and sunflower oil	g	TRUE	10007	Yes
Sunflower oil (one tablespoon)	Corn, soybean, peanut, sesame and sunflower oil	g	TRUE	10007	Yes
Soybean oil (one tablespoon)	Corn, soybean, peanut, sesame and sunflower oil	g	TRUE	10007	Yes
Margarine (individual portion, 12gr)	Margarine	g	TRUE	10001	Yes
Margarine (individual portion, 12gr)	Margarine	g	TRUE	10001	Yes
Margarine (individual portion, 12gr)	Margarine	g	TRUE	10001	Yes
Margarine (individual portion, 12gr)	Margarine	g	TRUE	10001	Yes
Margarine (individual portion, 12gr)	Margarine	g	TRUE	10001	Yes
Margarine (individual portion, 12gr)	Margarine	g	TRUE	10002	Yes
Margarine (individual portion, 12gr)	Margarine	g	TRUE	10002	Yes
Margarine (individual portion, 12gr)	Margarine	g	TRUE	10002	Yes
Margarine (individual portion, 12gr)	Margarine	g	TRUE	10002	Yes
Margarine (individual portion, 12gr)	Margarine	g	TRUE	10002	Yes
Margarine (individual portion, 12gr)	Margarine	g	TRUE	10003	Yes
Margarine (individual portion, 12gr)	Margarine	g	TRUE	10003	Yes
Margarine (individual portion, 12gr)	Margarine	g	TRUE	10003	Yes
Margarine (individual portion, 12gr)	Margarine	g	TRUE	10003	Yes
Margarine (individual portion, 12gr)	Margarine	g	TRUE	10003	Yes
Butter (individual portion, 12gr)	Butter or ghee	g	TRUE	10004	Yes
Butter (individual portion, 12gr)	Butter or ghee	g	TRUE	10004	Yes
Butter (individual portion, 12gr)	Butter or ghee	g	TRUE	10004	Yes
Butter (individual portion, 12gr)	Butter or ghee	g	TRUE	10004	Yes
Butter (individual portion, 12gr)	Butter or ghee	g	TRUE	10004	Yes
Butter (individual portion, 12gr)	Butter or ghee	g	TRUE	10014	Yes
Butter (individual portion, 12gr)	Butter or ghee	g	TRUE	10014	Yes
Butter (individual portion, 12gr)	Butter or ghee	g	TRUE	10014	Yes
Butter (individual portion, 12gr)	Butter or ghee	g	TRUE	10014	Yes
Lard (dessert tablespoon, 10gr)	Lard, bacon fat or meat drippings	g	TRUE	10005	No
Maria type cookies (4 -6 units, 50gr)	Cookies and cakes	g	TRUE	80005	Yes
Whole grain or fiber biscuits (4-6 units, 50gr)	Muffins, scones, croissants and biscuits	g	TRUE	60028	Yes
Chocolate biscuits (4 units, 50gr)	Muffins, scones, croissants and biscuits	g	TRUE	60028	Yes
Homemade pastries and biscuits (Unit, 50gr)	Muffins, scones, croissants and biscuits	g	TRUE	60028	Yes
Croissant, ensaimadas, tea cakes or other industrial pastries (unit, 50gr)	Muffins, scones, croissants and biscuits	g	TRUE	60028	Yes
Donuts (unit)	Doughnuts, pies and pastries	g	TRUE	120012	No
Cupcakes (1-2 units)	Muffins, scones, croissants and biscuits	g	TRUE	60028	Yes
Cakes (one, 50gr)	Cookies and cakes	g	TRUE	80005	Yes
Cakes (one, 50gr)	Cookies and cakes	g	TRUE	80010	Yes
Churros, batons (1 portion, 100gr)	Doughnuts, pies and pastries	g	TRUE	120012	No
Chocolates(30gr) and bonbons(2 units)	Sweets and confectionery	g	TRUE	80008	Yes
Cocoa powder or soluble (nesquik, colacao, etc) (dessert spoon)		g	FALSE		No
Nougat(1/8 of bar, 40gr)	Sweets and confectionery	g	TRUE	80008	Yes
Mantecados, marzipan (90gr)	Cookies and cakes	g	TRUE	80005	Yes
Croquettes, fritters, pasties, pre-cooked (one)			FALSE		No
Soups and creams in packets (1 plate)	Soups and creams	g	TRUE	40031	Yes
Soups and creams in packets (1 plate)	Soups and creams	g	TRUE	40032	Yes
Soups and creams in packets (1 plate)	Soups and creams	g	TRUE	40033	Yes
Soups and creams in packets (1 plate)	Soups and creams	g	TRUE	40069	Yes
Soups and creams in packets (1 plate)	Soups and creams	g	TRUE	40070	Yes
Soups and creams in packets (1 plate)	Soups and creams	g	TRUE	40077	Yes
Mustard (dessert teaspoon)	Mustard	g	TRUE	120811	No
Commercial mayonnaise (dessert teaspoon )	Mayonnaise	g	TRUE	60012	Yes
Commercial mayonnaise (dessert teaspoon )	Mayonnaise	g	TRUE	60013	Yes
Commercial mayonnaise (dessert teaspoon )	Mayonnaise	g	TRUE	60014	Yes
Fried tomato sauce, ketchup (1 teaspoon)	Ketchup	g	TRUE	60026	Yes
Spicy: Tabasco, pepper or paprika (a pinch)	Salsa, pepper or paprika	g	TRUE	60027	No
Salt (a pinch)	Salt	g	TRUE	10100	Yes
Jams (1 dessert teaspoon)	Jam, jelly, honey, syrup or sugar on bread, pancakes or waffles	g	TRUE	60037	Yes
Sugar (1 dessert teaspoon)	Sugar	g	TRUE	60037	No
Sugar (1 dessert teaspoon)	Sugar	g	TRUE	60037	No
Sugar (1 dessert teaspoon)	Sugar	g	TRUE	60037	No
Sugar (1 dessert teaspoon)	Sugar	g	TRUE	60037	No
Sugar (1 dessert teaspoon)	Sugar	g	TRUE	60037	No
Sugar (1 dessert teaspoon)	Sugar	g	TRUE	60037	No
Honey (a teaspoon of dessert)	Jam, jelly, honey, syrup or sugar on bread, pancakes or waffles	g	TRUE	60037	Yes
Snacks other than chips: worms, popcorn, corn, etc. (1 bag, 50gr)	Snacks other than chips: worms, popcorn, corn, etc.	g	TRUE	60032	No
Snacks other than chips: worms, popcorn, corn, etc. (1 bag, 50gr)	Snacks other than chips: worms, popcorn, corn, etc.	g	TRUE	60033	No
Carbonated drinks with sugar: Coca-Cola, Fanta, lemonade, tonic (1 bottle, 200ml)	Regular soft drinks (not diet)	g	TRUE	90051	Yes
Low-calorie carbonated drinks: Light or zero (1 bottle, 200ml)	Diet soft drinks	g	TRUE	90050	No
Natural orange juice (1 glass, 200ml)	100% orange juice and grapefruit juice	g	TRUE	90011	Yes
Natural juices from other fruits (1 glass, 200ml)	100% fruit juice such as apple, grape and cranberry	g	TRUE	90013	Yes
Orange juices commercial fruits (unit)	Commercial fruit juices	g	TRUE	120829	Yes
Orange juices commercial fruits (unit)	Commercial fruit juices	g	TRUE	120839	Yes
Orange juices commercial fruits (unit)	Commercial fruit juices	g	TRUE	90028	Yes
Decaffeinated coffee (1 cup, 50ml)	Decaf coffee	g	TRUE	120603	No
Decaffeinated coffee (1 cup, 50ml)	Decaf coffee	g	TRUE	120603	No
Coffee (1 cup, 50ml)	Coffee	g	TRUE	90008	Yes
Coffee (1 cup, 50ml)	Coffee	g	TRUE	90008	Yes
Coffee (1 cup, 50ml)	Coffee	g	TRUE	120737	Yes
Tea (1 cup, 50ml)	Tea	g	TRUE	120473	Yes
Tea (1 cup, 50ml)	Tea	g	TRUE	120474	Yes
Ros√© wine (large glass, 100ml)	White, ros√©, muscatel and rice wine	g	TRUE	90019	No
White wine (large glass, 100ml)	White, ros√©, muscatel and rice wine	g	TRUE	90019	No
Young red wine (large glass, 100ml)	Red Wine	g	TRUE	90018	No
Aged red wine (large glass, 100ml)	Red Wine	g	TRUE	90018	No
Muscatel wine (glass, 50ml)	White, ros√©, muscatel and rice wine	g	TRUE	90019	No
Cava (large glass, 100ml)	White, ros√©, muscatel and rice wine	g	TRUE	90019	No
Beer (1 jug,330ml)	Beer	g	TRUE	90002	No
Beer (1 jug,330ml)	Beer	g	TRUE	120355	No
Spirits, aniseed, anisette (glass,50ml)	Liquor and mixed drinks	g	TRUE	90004	No
Spirits: vodka, whiskey, gin (glass,50ml)	Liquor and mixed drinks	g	TRUE	90004	No
US/UK/Mexico
100__fruit_juice_such_as_apple__grape_and_cranberry_foodCode_90013	100% fruit juice such as apple, grape and cranberry				Yes
1__milk__Decaf_latte__cappuccino_and_mocha__foodCode_120783					No
1__milk__Hot_chocolate__foodCode_120795					No
1__milk__Latte__cappuccino_and_mocha__foodCode_120819					No
2__milk__Decaf_latte__cappuccino_and_mocha__foodCode_120782					No
2__milk__Hot_chocolate__foodCode_120794					No
2__milk__Latte__cappuccino_and_mocha__foodCode_120818					No
All_other_beans_such_as_baked_beans__lima_beans_and_chili_without_meat_foodCode_30044					No
All_other_cheese__such_as_American__cheddar_or_cream_cheese__including_cheese_used_in_cooking_foodCode_70005	Cheese				Yes
All_other_fruits_foodCode_20025					No
All_other_lunch_meat_such_as_bologna__salami_and_Spam_foodCode_40029					No
All_tea_foodCode_90009					No
Almond__walnut_and_pistachio_oil__Fat_used_in_cooking__foodCode_120748					No
Almond_milk__Alternative_nondairy_milk_as_a_beverage__foodCode_120740					No
Almond_milk__Coffee__foodCode_120740					No
Almond_milk__Decaf_latte__cappuccino_and_mocha__foodCode_120787					No
Almond_milk__Green__black_or_white_tea__foodCode_120740					No
Almond_milk__Herbal_tea__foodCode_120740					No
Almond_milk__Hot_chocolate__foodCode_120799					No
Almond_milk__Iced_coffee__foodCode_120740					No
Almond_milk__Latte__cappuccino_and_mocha__foodCode_120823					No
Almond_milk__Milk_in_cooked_cereal__foodCode_120740					No
Almond_milk__Milk_on_cold_cereal__foodCode_120740					No
Almond_milk__Milk_on_cooked_cereal__foodCode_120740					No
American__cheddar_or_cream_cheese__including_cheese_used_in_cooking_foodCode_70005	Cheese				Yes
Apples__applesauce_and_pears_foodCode_20001	Apples, applesauce and pears				Yes
Apricots___dried_foodCode_20018					No
Apricots___fresh_or_canned_foodCode_20017					No
Asian_style__stir_fried__noodles_and_rice__such_as_chow_mein__fried_rice_and_pad_Thai_foodCode_40051					No
Asian_style_noodle_soup_foodCode_40070	Soups and creams				Yes
Atole_made_with_nondairy_milk_and_water_foodCode_120858					No
Atole_with_nondairy_milk_foodCode_120857					No
Atole_with_nonfat_milk_and_water_foodCode_120856					No
Atole_with_nonfat_milk_foodCode_120855					No
Atole_with_semi_skimmed__milk_and_water_foodCode_140006					No
Atole_with_semi_skimmed_milk_foodCode_140005					No
Atole_with_water_foodCode_120848					No
Atole_with_whole_milk_and_water_foodCode_120850					No
Atole_with_whole_milk_foodCode_120849					No
Avocado_and_guacamole_foodCode_30006	Avocado and guacamole				No
Bacon_and_breakfast_sausage_foodCode_50005	Bacon and breakfast sausage				Yes
Baked_beans_or_chili_with_meat_foodCode_120807					No
Baked_beans_or_chili_without_meat_foodCode_120806					No
Bananas_foodCode_20002	Bananas				Yes
Bean_soups_such_as_pea__lentil_and_black_bean_foodCode_40032	Soups and creams				Yes
Beef__pork__ham_and_lamb___with_fat_foodCode_40002	Beef, pork, ham and lamb, with and without fat				Yes
Beef__pork__ham_and_lamb___without_fat_foodCode_40058	Beef, pork, ham and lamb, with and without fat				Yes
Beer__all_types__foodCode_90002	Beer				No
Beer__light_foodCode_120355	Beer				No
Beer__regular_foodCode_90002	Beer				No
Beets__cooked__pickled_or_raw__foodCode_120455					No
Berries_such_as_strawberries_and_blueberries_foodCode_20021	Berries such as strawberries and blueberries				Yes
Broccoli_foodCode_30012	Cruciferous vegetables				Yes
Burritos__tacos__tostadas_and_quesadillas_foodCode_40202					No
Burritos_or_fajitas_with_meat_foodCode_120768					No
Butter__Cereals_and_Breads__foodCode_10004	Butter or ghee				Yes
Butter__Fat_used_in_cooking__foodCode_10004	Butter or ghee				Yes
Butter__Fats_on_potatoes__rice__noodles_and_beans__foodCode_10004	Butter or ghee				Yes
Butter__Fats_used_on_vegetables__foodCode_10004	Butter or ghee				Yes
Butter_or_ghee__Cereals_and_Breads__foodCode_10004	Butter or ghee				Yes
Butter_or_ghee__Fat_used_in_cooking__foodCode_10004	Butter or ghee				Yes
Butter_or_ghee__Fats_on_grains_and_beans__foodCode_10004	Butter or ghee				Yes
Butter_or_ghee__Fats_on_potatoes_and_squash__foodCode_10004	Butter or ghee				Yes
Butter_or_ghee__Fats_used_on_vegetables__foodCode_10004	Butter or ghee				Yes
Buttered_or_regular_microwave_popcorn_foodCode_60033	Snacks other than chips: worms, popcorn, corn, etc.				No
Canned_tuna__tuna_salad_and_tuna_casserole_foodCode_40063	Canned fish and shellfish (sardines, anchovies, bonito, tuna)				Yes
Cantaloupe__melon_and_mango__in_season__foodCode_20022	Cantaloupe, melon and mango (in season)				No
Cantaloupe_foodCode_120027					No
Carrots___cooked_foodCode_30041	Carrots and winter squash				Yes
Carrots___raw_foodCode_30040	Carrots and winter squash				Yes
Cashew__hazelnut_or_pecan_milk__Alternative_nondairy_milk_as_a_beverage__foodCode_120742					No
Cashew__hazelnut_or_pecan_milk__Coffee__foodCode_120742					No
Cashew__hazelnut_or_pecan_milk__Decaf_latte__cappuccino_and_mocha__foodCode_120789					No
Cashew__hazelnut_or_pecan_milk__Green__black_or_white_tea__foodCode_120742					No
Cashew__hazelnut_or_pecan_milk__Herbal_tea__foodCode_120742					No
Cashew__hazelnut_or_pecan_milk__Hot_chocolate__foodCode_120801					No
Cashew__hazelnut_or_pecan_milk__Iced_coffee__foodCode_120742					No
Cashew__hazelnut_or_pecan_milk__Latte__cappuccino_and_mocha__foodCode_120826					No
Cashew__hazelnut_or_pecan_milk__Milk_in_cooked_cereal__foodCode_120742					No
Cashew__hazelnut_or_pecan_milk__Milk_on_cold_cereal__foodCode_120742					No
Cashew__hazelnut_or_pecan_milk__Milk_on_cooked_cereal__foodCode_120742					No
Cauliflower__cabbage_and_Brussels_sprouts_foodCode_30018	Cruciferous vegetables				Yes
Cheese_sauce_and_cream_sauce_foodCode_60034					No
Cherries__fresh_foodCode_20027	Cherries, picotas, plums, peaches, nectarines, apricots				Yes
Chicken_and_turkey__roasted__stewed__grilled_or_broiled___with_skin_foodCode_40201	Chicken and turkey (roasted, stewed, grilled or broiled), with and without skin				Yes
Chicken_and_turkey__roasted__stewed__grilled_or_broiled___without_skin_foodCode_40200	Chicken and turkey (roasted, stewed, grilled or broiled), with and without skin				Yes
Chicken_noodle_soup_foodCode_40077	Soups and creams				Yes
Chile_Relleno_foodCode_120778					No
Chili_with_meat_foodCode_40005					No
Chimichangas_or_flautas_with_meat_foodCode_120774					No
Chocolate__candy_bars__and_toffee_foodCode_80008	Sweets and confectionery				Yes
Chocolate_and_other_flavored_milks__Milk_as_a_beverage__foodCode_120831	Ice cream and milkshakes				Yes
Coconut_milk__Alternative_nondairy_milk_as_a_beverage__foodCode_120741					No
Coconut_milk__Coffee__foodCode_120741					No
Coconut_milk__Decaf_latte__cappuccino_and_mocha__foodCode_120788					No
Coconut_milk__Green__black_or_white_tea__foodCode_120741					No
Coconut_milk__Herbal_tea__foodCode_120741					No
Coconut_milk__Hot_chocolate__foodCode_120800					No
Coconut_milk__Iced_coffee__foodCode_120741					No
Coconut_milk__Latte__cappuccino_and_mocha__foodCode_120824					No
Coconut_milk__Milk_in_cooked_cereal__foodCode_120741					No
Coconut_milk__Milk_on_cold_cereal__foodCode_120741					No
Coconut_milk__Milk_on_cooked_cereal__foodCode_120741					No
Coconut_oil__Fat_used_in_cooking__foodCode_120747					No
Coffee__not_lattes_or_mochas__foodCode_90008	Coffee				Yes
Coleslaw_foodCode_30017					No
Complete_or_primarily_whole_grain_cold_cereal_foodCode_120408	Complete or primarily whole grain cold cereal				No
Cooked_greens__such_as_kale__mustard_greens_and_collards_foodCode_120437					No
Cooked_greens__such_as_spinach__swiss_chard_and_beet_greens_foodCode_120438	Cooked greens, such as spinach, swiss chard and beet greens				No
Cooked_soybeans_or_edamame_foodCode_120197					No
Cooked_standard_grain_cereals_foodCode_120411					No
Cooked_whole_grain_cereals_foodCode_120410					No
Cookies_and_cakes___lowfat_foodCode_80010	Cookies and cakes				Yes
Cookies_and_cakes___regular_foodCode_80005	Cookies and cakes				Yes
Corn__soybean__peanut__sesame_and_sunflower_oil__Fat_used_in_cooking__foodCode_10007	Corn, soybean, peanut, sesame and sunflower oil				Yes
Corn_and_hominy_foodCode_30007					No
Corn_tortillas_foodCode_120123					No
Cornbread_and_corn_muffins_foodCode_60029					No
Cottage_cheese_and_ricotta_cheese_foodCode_70002					No
Cream__half_&_half__Coffee__foodCode_70012					No
Cream__half_&_half__Green__black_or_white_tea__foodCode_70012					No
Cream__half_&_half__Herbal_tea__foodCode_70012					No
Cream__half_&_half__Iced_coffee__foodCode_70012					No
Cream__half_&_half__Milk_in_cooked_cereal__foodCode_70012					No
Cream__half_&_half__Milk_on_cold_cereal__foodCode_70012					No
Cream__half_&_half__Milk_on_cooked_cereal__foodCode_70012					No
Cream__half_&_half__Tea__foodCode_70012					No
Cream__non_dairy_liquid__Coffee__foodCode_70013					No
Cream__non_dairy_liquid__Green__black_or_white_tea__foodCode_70013					No
Cream__non_dairy_liquid__Herbal_tea__foodCode_70013					No
Cream__non_dairy_liquid__Iced_coffee__foodCode_70013					No
Cream__non_dairy_liquid__Milk_in_cooked_cereal__foodCode_70013					No
Cream__non_dairy_liquid__Milk_on_cold_cereal__foodCode_70013					No
Cream__non_dairy_liquid__Milk_on_cooked_cereal__foodCode_70013					No
Cream__non_dairy_liquid__Tea__foodCode_70013					No
Cream_soups_such_as_chowders__potato_and_cheese_foodCode_40031	Soups and creams				Yes
Cucumber_foodCode_120863					No
Dark_fish__broiled_or_baked__such_as_salmon__mackerel_and_bluefish_foodCode_40074	Dark fish such as salmon, mackerel and bluefish				Yes
Decaf_coffee__not_lattes_or_mochas__foodCode_120603	Decaf coffee				No
Decaf_espresso_foodCode_120792					No
Decaf_iced_coffee_foodCode_120603	Decaf coffee				No
Decaf_latte__cappuccino_and_mocha__Whole_milk__foodCode_120781					No
Diet_soft_drinks_foodCode_90050	Diet soft drinks				No
Doughnuts__pies_and_pastries_foodCode_120012	Doughnuts, pies and pastries				No
Dried_beef__machaca__foodCode_120860					No
Dried_fish__charalitos__cod__foodCode_120861	Dried fish (charalitos, cod)				No
Dried_fruit__other_than_apricots__such_as_raisins_and_prunes_foodCode_20008	Dried fruit (other than apricots)				No
Dry_chili_foodCode_120870					No
Egg_whites_/_substitutes_foodCode_120587					No
Eggs_foodCode_50004	Eggs				Yes
Enchiladas__tacos_or_tostadas_with_meat_foodCode_120772					No
Enchiladas_and_tamales_foodCode_40076					No
Energy_drinks_such_as_Monster_and_Red_Bull_energy_drinks_foodCode_120662					No
Espresso_foodCode_120737	Coffee				Yes
Fish_or_shrimp_tacos_or_tostadas_foodCode_120773					No
Flavored_waters_such_as_VitaminWater__SoBe_and_coconut_water_foodCode_120738					No
Flax_or_hemp_milk__Alternative_nondairy_milk_as_a_beverage__foodCode_120743					No
Flax_or_hemp_milk__Decaf_latte__cappuccino_and_mocha__foodCode_120790					No
Flax_or_hemp_milk__Hot_chocolate__foodCode_120802					No
Flax_or_hemp_milk__Latte__cappuccino_and_mocha__foodCode_120838					No
Flax_or_hemp_milk__Milk_in_cooked_cereal__foodCode_120743					No
Flax_or_hemp_milk__Milk_on_cold_cereal__foodCode_120743					No
Flax_or_hemp_milk__Milk_on_cooked_cereal__foodCode_120743					No
Flaxseed__grapeseed__hemp__pumpkin_and_chia_oil__Fat_used_in_cooking__foodCode_120749					No
Flour_tortillas_foodCode_120248					No
French_fries__fried_potatoes_and_hash_browns_foodCode_30024					No
Fresh_garlic__including_in_cooking_foodCode_30043	Garlic				Yes
Fresh_tomatoes_foodCode_30008	Fresh tomatoes				Yes
Fried_chicken__including_chicken_nuggets_and_tenders_foodCode_40064	Fried chicken, including chicken nuggets and tenders				No
Fried_fish__fish_sandwich_and_fried_shellfish__shrimp__oysters__foodCode_120163	Fried fish, fish sandwich and fried shellfish (shrimp, oysters)				No
Fried_plantain_foodCode_120871					No
Fruit_drinks_fortified_with_Vitamin_C__such_as_Hi_C__Fruitopia__and_Kool_Aid_foodCode_90029					No
Fruit_nectars_foodCode_120844					No
Granola_bars_and_cereal_bars_such_as_Nutri_Grain_Bars_foodCode_60020					No
Granola_eaten_on_its_own__added_to_yogurt_or_trail_mix_foodCode_50011					No
Grapes__fresh_foodCode_20024	Grapes, fresh				Yes
Greek_yogurt__plain__full_fat_foodCode_120711	Yogurt				Yes
Greek_yogurt__plain__lowfat_foodCode_120712	Yogurt				Yes
Greek_yogurt__plain__nonfat_foodCode_120713	Yogurt				Yes
Greek_yogurt__sweetened_or_with_fruit__full_fat_foodCode_120714	Yogurt				Yes
Greek_yogurt__sweetened_or_with_fruit__lowfat_foodCode_120715	Yogurt				Yes
Greek_yogurt__sweetened_or_with_fruit__nonfat_foodCode_120716	Yogurt				Yes
Green__black_or_white_tea_foodCode_120473	Tea				Yes
Green_or_string_beans_foodCode_30001	Green or string beans				Yes
Green_peas_foodCode_30002	Green peas				No
Green_peppers_and_green_chilies__cooked_foodCode_30054	Peppers cooked and raw				Yes
Green_peppers_and_green_chilies__raw_foodCode_30055	Peppers cooked and raw				Yes
Green_salad__Lettuce_or_spinach__foodCode_30021	Leafy greens				Yes
Ground_meat__chicken_or_turkey_foodCode_40042	Ground meat				No
Ground_meat__extra_lean_foodCode_40041	Ground meat				No
Ground_meat__lean_foodCode_40040	Ground meat				No
Ground_meat__regular_foodCode_40001	Ground meat				No
Guava_foodCode_120872					No
Herbal_tea_such_as_mint__chamomile__herbal_blends_and_sleepy_time_foodCode_120474	Tea				Yes
Highly_fortified_cereals_foodCode_120542					No
Honeydew_foodCode_120260					No
Hot_chilies/peppers__fresh__packaged__or_canned__foodCode_120865					No
Hot_sauce_foodCode_120868					No
Hummus_foodCode_120808					No
Ice_cream_and_milkshakes_foodCode_80050	Ice cream and milkshakes				Yes
Iced_coffee_foodCode_90008	Coffee				Yes
Jam__jelly__honey__syrup_or_sugar_on_bread__pancakes_or_waffles_foodCode_60037	Jam, jelly, honey, syrup or sugar on bread, pancakes or waffles				Yes
Japanese_Noodles_foodCode_120419	Rice, pasta and noodles				Yes
Japanese_nuts_foodCode_120843					No
Jicama_foodCode_120867					No
Ketchup_foodCode_60026	Ketchup				Yes
Kombucha_or_jun_foodCode_120836					No
Lard__bacon_fat_or_meat_drippings__Fat_used_in_cooking__foodCode_10005	Lard, bacon fat or meat drippings				No
Latte__1__milk___mocha_or_hot_chocolate_foodCode_90024					No
Latte__2__milk___mocha_or_hot_chocolate_foodCode_90023					No
Latte__Non_fat_milk___mocha_or_hot_chocolate_foodCode_90025					No
Latte___nondairy_creamer___mocha_or_hot_chocolate_foodCode_120636					No
Latte___regular_or_lowfat__NOT_fortified_soymilk___mocha_or_hot_chocolate_foodCode_120553					No
Latte___regular_or_lowfat__fortified_soymilk___mocha_or_hot_chocolate_foodCode_120552					No
Latte__cappuccino_and_mocha__Whole_milk__foodCode_120817					No
Latte__rice_milk___mocha_or_hot_chocolate_foodCode_120635					No
Latte__whole_milk___mocha_or_hot_chocolate_foodCode_90007					No
Legumes_such_as_black__pinto__garbanzo_and_lentils_foodCode_120805	Legumes such as black, pinto, garbanzo and lentils				No
Lifesavers__licorice_and_jelly_beans_foodCode_80015	Sweets and confectionery				Yes
Lime_foodCode_120869					No
Liquor_and_mixed_drinks_foodCode_90004	Liquor and mixed drinks				No
Liver__chicken_liver__organ_meats_foodCode_40006	Organ meats				Yes
Low_calorie_orange_and_grapefruit_juice_foodCode_120839	Commercial fruit juices				Yes
Low_fat_Butter__Cereals_and_Breads__foodCode_10014	Butter or ghee				Yes
Low_fat_Butter__Fats_on_grains_and_beans__foodCode_10014	Butter or ghee				Yes
Low_fat_Butter__Fats_on_potatoes__rice__noodles_and_beans__foodCode_10014	Butter or ghee				Yes
Low_fat_Butter__Fats_on_potatoes_and_squash__foodCode_10014	Butter or ghee				Yes
Low_fat_Butter__Fats_used_on_vegetables__foodCode_10014	Butter or ghee				Yes
Low_fat_cheese_and_low_fat_cream_cheese__including_cheese_used_in_cooking_foodCode_120717	Cheese				Yes
Low_fat_or_nonfat_chocolate_and_other_flavored_milks__Milk_as_a_beverage__foodCode_120832	Ice cream and milkshakes				Yes
Low_fat_or_nonfat_salty_snacks_such_as_pretzels_and_low_fat_potato__tortilla_and_corn_chips_foodCode_120733	Potato, tortilla chips, corn chips and puffs				Yes
Low_fat_sour_cream__Fats_on_grains_and_beans__foodCode_120700					No
Low_fat_sour_cream__Fats_on_potatoes_and_squash__foodCode_120700					No
Low_fat_sour_cream__Fats_used_on_vegetables__foodCode_120700					No
Low_or_nonfat_crackers__such_as_saltines_and_SnackWell_s_foodCode_60009	Low or nonfat crackers, such as saltines, SnackWell's, rice crackers				No
Low_or_nonfat_frozen_desserts_such_as_lowfat_ice_cream__frozen_yogurt__and_sherbet_foodCode_80003					No
Low_or_nonfat_potato_chips__tortilla_chips__corn_chips_and_pretzels_foodCode_60036					No
Low_or_reduced_fat_cheese__including_cheese_used_in_cooking_foodCode_70004					No
Low_or_reduced_fat_hot_dogs_and_sausage_foodCode_40062	Processed meats				Yes
Lowfat_cottage_cheese_and_ricotta_cheese_foodCode_120703	Cheese				Yes
Lowfat_whole_grain_crackers_foodCode_120539					No
Lunch_meat_such_as_bologna__salami_and_Spam_foodCode_40029					No
Lunch_meats_such_as_ham__turkey_and_lowfat_bologna_foodCode_40028	Lunch meats such as ham, turkey and lowfat bologna				Yes
Made_with_water__Hot_chocolate__foodCode_120804					No
Mango_foodCode_120255					No
Margarine__lowfat__Cereals_and_Breads__foodCode_10001	Margarine				Yes
Margarine__lowfat__Fat_used_in_cooking__foodCode_10001	Margarine				Yes
Margarine__lowfat__Fats_on_grains_and_beans__foodCode_10001	Margarine				Yes
Margarine__lowfat__Fats_on_potatoes__rice__noodles_and_beans__foodCode_10001	Margarine				Yes
Margarine__lowfat__Fats_on_potatoes_and_squash__foodCode_10001	Margarine				Yes
Margarine__lowfat__Fats_used_on_vegetables__foodCode_10001	Margarine				Yes
Margarine__stick__Cereals_and_Breads__foodCode_10002	Margarine				Yes
Margarine__stick__Fat_used_in_cooking__foodCode_10002	Margarine				Yes
Margarine__stick__Fats_on_grains_and_beans__foodCode_10002	Margarine				Yes
Margarine__stick__Fats_on_potatoes__rice__noodles_and_beans__foodCode_10002	Margarine				Yes
Margarine__stick__Fats_on_potatoes_and_squash__foodCode_10002	Margarine				Yes
Margarine__stick__Fats_used_on_vegetables__foodCode_10002	Margarine				Yes
Margarine__tub__Cereals_and_Breads__foodCode_10003	Margarine				Yes
Margarine__tub__Fat_used_in_cooking__foodCode_10003	Margarine				Yes
Margarine__tub__Fats_on_grains_and_beans__foodCode_10003	Margarine				Yes
Margarine__tub__Fats_on_potatoes__rice__noodles_and_beans__foodCode_10003	Margarine				Yes
Margarine__tub__Fats_on_potatoes_and_squash__foodCode_10003	Margarine				Yes
Margarine__tub__Fats_used_on_vegetables__foodCode_10003	Margarine				Yes
Marshmallow_sweets_foodCode_120874					No
Mayonnaise__fat_free_or_nonfat_foodCode_60014	Mayonnaise				Yes
Mayonnaise__low_or_reduced_fat_foodCode_60013	Mayonnaise				Yes
Mayonnaise__regular_foodCode_60012	Mayonnaise				Yes
Meal_replacement_bars_such_as_Atkins_Advantage__Slim_Fast__Quest._MET_Rx_Big_100__ProBar__GoMacro_and_Vega_bars_foodCode_120834					No
Meal_replacement_drinks_and_shakes_containing_soy_or_soy_protein_[SOY]_foodCode_120187					No
Meal_replacement_drinks_and_shakes_containing_soy_or_soy_protein_foodCode_120187					No
Meal_replacement_drinks_and_shakes_such_as_Slim_Fast__Ensure_and_Carnation_Instant_Breakfast_foodCode_90015					No
Meat_gravies_foodCode_60025					No
Milk__1___Coffee__foodCode_70010	Low and nonfat milk				Yes
Milk__1___Green__black_or_white_tea__foodCode_70010	Low and nonfat milk				Yes
Milk__1___Iced_coffee__foodCode_70010	Low and nonfat milk				Yes
Milk__1___Milk_as_a_beverage__foodCode_70010	Low and nonfat milk				Yes
Milk__1___Milk_in_cooked_cereal__foodCode_70010	Low and nonfat milk				Yes
Milk__1___Milk_on_cold_cereal__foodCode_70010	Low and nonfat milk				Yes
Milk__1___Milk_on_cooked_cereal__foodCode_70010	Low and nonfat milk				Yes
Milk__1___Tea__foodCode_70010	Low and nonfat milk				Yes
Milk__2___Coffee__foodCode_70009	Low and nonfat milk				Yes
Milk__2___Green__black_or_white_tea__foodCode_70009	Low and nonfat milk				Yes
Milk__2___Herbal_tea__foodCode_70009	Low and nonfat milk				Yes
Milk__2___Iced_coffee__foodCode_70009	Low and nonfat milk				Yes
Milk__2___Milk_as_a_beverage__foodCode_70009	Low and nonfat milk				Yes
Milk__2___Milk_in_cooked_cereal__foodCode_70009	Low and nonfat milk				Yes
Milk__2___Milk_on_cold_cereal__foodCode_70009	Low and nonfat milk				Yes
Milk__2___Milk_on_cooked_cereal__foodCode_70009	Low and nonfat milk				Yes
Milk__2___Tea__foodCode_70009	Low and nonfat milk				Yes
Milk__semi_skimmed__Coffee__foodCode_140001					No
Milk__semi_skimmed__Green__black_or_white_tea__foodCode_140001					No
Milk__semi_skimmed__Herbal_tea__foodCode_140001					No
Milk__semi_skimmed__Iced_coffee__foodCode_140001					No
Milk__semi_skimmed__Milk_as_a_beverage__foodCode_140001					No
Milk__semi_skimmed__Milk_in_cooked_cereal__foodCode_140001					No
Milk__semi_skimmed__Milk_on_cold_cereal__foodCode_140001					No
Milk__semi_skimmed__Milk_on_cooked_cereal__foodCode_140001					No
Milk__skim__Coffee__foodCode_70011	Low and nonfat milk				Yes
Milk__skim__Green__black_or_white_tea__foodCode_70011	Low and nonfat milk				Yes
Milk__skim__Herbal_tea__foodCode_70011	Low and nonfat milk				Yes
Milk__skim__Iced_coffee__foodCode_70011	Low and nonfat milk				Yes
Milk__skim__Milk_as_a_beverage__foodCode_70011	Low and nonfat milk				Yes
Milk__skim__Milk_in_cooked_cereal__foodCode_70011	Low and nonfat milk				Yes
Milk__skim__Milk_on_cold_cereal__foodCode_70011	Low and nonfat milk				Yes
Milk__skim__Milk_on_cooked_cereal__foodCode_70011	Low and nonfat milk				Yes
Milk__skim__Tea__foodCode_70011	Low and nonfat milk				Yes
Milk__whole__Coffee__foodCode_70008	Whole milk				Yes
Milk__whole__Green__black_or_white_tea__foodCode_70008	Whole milk				Yes
Milk__whole__Herbal_tea__foodCode_70008	Whole milk				Yes
Milk__whole__Iced_coffee__foodCode_70008	Whole milk				Yes
Milk__whole__Milk_as_a_beverage__foodCode_70008	Whole milk				Yes
Milk__whole__Milk_in_cooked_cereal__foodCode_70008	Whole milk				Yes
Milk__whole__Milk_on_cold_cereal__foodCode_70008	Whole milk				Yes
Milk__whole__Milk_on_cooked_cereal__foodCode_70008	Whole milk				Yes
Milk__whole__Tea__foodCode_70008	Whole milk				Yes
Miso_soup_foodCode_40069	Soups and creams				Yes
Muffins__scones__croissants_and_biscuits_foodCode_60028	Muffins, scones, croissants and biscuits				Yes
Mushrooms_cooked_in_soup__stew_or_main_dishes_such_as_white__shiitake_and_portabella_foodCode_120780	Mushrooms				Yes
Mustard_foodCode_120811	Mustard				No
Natto_foodCode_120766					No
Natural_juices_with_sugar_foodCode_120845					No
Nondairy_almond_milk_ice_cream_foodCode_120814					No
Nondairy_cashew_milk_ice_cream_foodCode_120815					No
Nondairy_coconut_milk_ice_cream_foodCode_120812					No
Nondairy_rice_milk_ice_cream_foodCode_120813					No
Nonfat_cheese_and_nonfat_cream_cheese__including_cheese_used_in_cooking_foodCode_120718	Cheese				Yes
Nonfat_cottage_cheese_and_ricotta_cheese_foodCode_120704	Cheese				Yes
Nonfat_or_skim_milk__Decaf_latte__cappuccino_and_mocha__foodCode_120784					No
Nonfat_or_skim_milk__Hot_chocolate__foodCode_120796					No
Nonfat_or_skim_milk__Latte__cappuccino_and_mocha__foodCode_120820					No
Nonfat_sour_cream__Fats_on_grains_and_beans__foodCode_120701					No
Nonfat_sour_cream__Fats_on_potatoes_and_squash__foodCode_120701					No
Nonfat_sour_cream__Fats_used_on_vegetables__foodCode_120701					No
Noodles_and_other_grains__as_a_side_dish__foodCode_120416					No
Nopales___cactus_foodCode_120864					No
Oat_or_quinoa_milk__Alternative_nondairy_milk_as_a_beverage__foodCode_120744					No
Oat_or_quinoa_milk__Coffee__foodCode_120744					No
Oat_or_quinoa_milk__Decaf_latte__cappuccino_and_mocha__foodCode_120791					No
Oat_or_quinoa_milk__Green__black_or_white_tea__foodCode_120744					No
Oat_or_quinoa_milk__Herbal_tea__foodCode_120744					No
Oat_or_quinoa_milk__Hot_chocolate__foodCode_120803					No
Oat_or_quinoa_milk__Iced_coffee__foodCode_120744					No
Oat_or_quinoa_milk__Latte__cappuccino_and_mocha__foodCode_120828					No
Oat_or_quinoa_milk__Milk_in_cooked_cereal__foodCode_120744					No
Oat_or_quinoa_milk__Milk_on_cold_cereal__foodCode_120744					No
Oat_or_quinoa_milk__Milk_on_cooked_cereal__foodCode_120744					No
Oil__canola__Fat_used_in_cooking__foodCode_10011					No
Oil__olive__Cereals_and_Breads__foodCode_10010	Oil, olive				Yes
Oil__olive__Fat_used_in_cooking__foodCode_10010	Oil, olive				Yes
Oil__olive__Fats_on_grains_and_beans__foodCode_10010	Oil, olive				Yes
Oil__olive__Fats_on_potatoes__rice__noodles_and_beans__foodCode_10010	Oil, olive				Yes
Oil__olive__Fats_on_potatoes_and_squash__foodCode_10010	Oil, olive				Yes
Oil__olive__Fats_used_on_vegetables__foodCode_10010	Oil, olive				Yes
Oil__other_such_as_corn__soybean__safflower_or_peanut__Fat_used_in_cooking__foodCode_10007	Corn, soybean, peanut, sesame and sunflower oil				Yes
Onions_and_leeks_foodCode_30019	Onions and leeks				Yes
Orange_and_grapefruit_juice_with_Calcium_and_Vitamin_D_foodCode_120829	Commercial fruit juices				Yes
Orange_and_grapefruit_juice_with_Calcium_foodCode_120021					No
Orange_and_grapefruit_juice_with_Vitamins_A__E_and_C_foodCode_120024					No
Orange_juice_and_grapefruit_juice_foodCode_90011	100% orange juice and grapefruit juice				Yes
Oranges__grapefruit_and_tangerines__not_juice__foodCode_20009	Oranges, grapefruit and tangerines (not juice)				Yes
Other_100__fruit_juice_such_as_apple__grape_and_cranberry_foodCode_90013	100% fruit juice such as apple, grape and cranberry				Yes
Other_candy__such_as_Lifesavers__licorice_and_jelly_beans_foodCode_80015	Sweets and confectionery				Yes
Other_fortified_cereals_foodCode_120543					No
Other_fruit_including_fruit_cocktail_or_mixed_fruit_salads_foodCode_20025					No
Other_soups_such_as_chicken_noodle_foodCode_40077	Soups and creams				Yes
Other_soy_desserts_such_as_cheesecake_foodCode_120201					No
Packaged_mixed_dishes_with_soy_or_tofu_foodCode_120194					No
Pancakes__French_toast__and_waffles_foodCode_50010					No
Papaya_foodCode_120873					No
Pea_protein_milk__Alternative_nondairy_milk_as_a_beverage__foodCode_120745					No
Pea_protein_milk__Coffee__foodCode_120745					No
Pea_protein_milk__Green__black_or_white_tea__foodCode_120745					No
Pea_protein_milk__Milk_in_cooked_cereal__foodCode_120745					No
Pea_protein_milk__Milk_on_cold_cereal__foodCode_120745					No
Pea_protein_milk__Milk_on_cooked_cereal__foodCode_120745					No
Peaches__nectarines_and_plums_foodCode_20020	Cherries, picotas, plums, peaches, nectarines, apricots				Yes
Peanut_butter__peanuts_and_other_nuts_and_seeds_foodCode_60011	Peanut butter, peanuts and other nuts and seeds				Yes
Pineapple__fresh_and_canned_foodCode_20026	Pineapple, fresh and canned				No
Pizza_foodCode_120538	Pizza				No
Plain_popcorn__no_butter__or_lowfat_microwave_popcorn_foodCode_60032	Snacks other than chips: worms, popcorn, corn, etc.				No
Potato__macaroni_and_pasta_salads_made_with_mayonnaise_or_oil_foodCode_30027					No
Potatoes__boiled__baked_or_mashed__foodCode_30026	Potatoes				Yes
Pozole___beef/pork_soup/stew_foodCode_120862					No
Protein_shakes_such_as_Muscle_Milk__MET_Rx_Protein__Vega_Protein_Shake_and_EAS_Protein_Shake_foodCode_120833					No
Pudding__custard_and_flan_foodCode_80002	Pudding, custard and flan				No
Pupusas_or_empanadas_with_meat_foodCode_120776					No
Quesadillas_with_meat_foodCode_120777					No
Quick_energy_gels_or_chews_such_as_Gu_Energy_Gel__Hammer_Gel__Clif_Bloks_Energy_Chews__Jelly_Belly_Sports_Beans_and_Bonk_Breaker_Chews_foodCode_120835					No
Quinoa__sorghum__millet_or_kasha__buckwheat_groats__foodCode_120810	Quinoa, sorghum, millet or kasha (buckwheat groats)				No
Red_Wine_foodCode_90018	Red Wine				No
Red_peppers_and_red_chilies__cooked_foodCode_30057	Peppers cooked and raw				Yes
Red_peppers_and_red_chilies__raw_foodCode_30056	Peppers cooked and raw				Yes
Refried_beans_foodCode_30050	Refried beans				No
Regular_cottage_cheese_and_ricotta_cheese_foodCode_120702	Cheese				Yes
Regular_crackers__such_as_Ritz_and_Wheat_Thins_foodCode_60024					No
Regular_hot_dogs_and_sausage_such_as_bratwurst_and_chorizo_foodCode_40030	Processed meats				Yes
Regular_potato__tortilla_chips__corn_chips_and_puffs_foodCode_60031	Potato, tortilla chips, corn chips and puffs				Yes
Regular_soft_drinks__not_diet__foodCode_90051	Regular soft drinks (not diet)				Yes
Regular_sour_cream__Fats_on_grains_and_beans__foodCode_120699					No
Regular_sour_cream__Fats_on_potatoes_and_squash__foodCode_120699					No
Regular_sour_cream__Fats_used_on_vegetables__foodCode_120699					No
Regular_whole_grain_crackers_foodCode_120540					No
Rice_and_beans__eaten_together_as_a_side_dish_foodCode_120809					No
Rice_milk__Alternative_nondairy_milk_as_a_beverage__foodCode_70018					No
Rice_milk__Coffee__foodCode_70018					No
Rice_milk__Decaf_latte__cappuccino_and_mocha__foodCode_120786					No
Rice_milk__Green__black_or_white_tea__foodCode_70018					No
Rice_milk__Herbal_tea__foodCode_70018					No
Rice_milk__Hot_chocolate__foodCode_120798					No
Rice_milk__Latte__cappuccino_and_mocha__foodCode_120822					No
Rice_milk__Milk_as_a_beverage__foodCode_70018					No
Rice_milk__Milk_in_cooked_cereal__foodCode_70018					No
Rice_milk__Milk_on_cold_cereal__foodCode_70018					No
Rice_milk__Milk_on_cooked_cereal__foodCode_70018					No
Rice_milk__Tea__foodCode_70018					No
Roasted_soy_nuts_and_soy_nut_butter_foodCode_120202					No
Safflower__avocado__pecan_and_hazelnut_oil__Fat_used_in_cooking__foodCode_120746					No
Salad_dressing___dairy_based_foodCode_120753	Dressing				No
Salad_dressing___fat_free_foodCode_30033					No
Salad_dressing___lowfat_foodCode_30032					No
Salad_dressing___regular_foodCode_120752	Dressing				No
Salad_dressing___regular_foodCode_30022					No
Salsa__as_dip_or_on_foods__foodCode_60027	Salsa, pepper or paprika				No
Salt_foodCode_10100	Salt				Yes
Sauerkraut__kimchi_or_pickled_vegetables__unpasteurized_and_raw__foodCode_120837	Sauerkraut, kimchi or pickled vegetables (unpasteurized and raw)				No
Semi_skimmed_milk__Decaf_latte__cappuccino_and_mocha__foodCode_140002					No
Semi_skimmed_milk__Hot_chocolate__foodCode_140003					No
Semi_skimmed_milk__Latte__cappuccino_and_mocha__foodCode_140004					No
Shellfish__not_fried__shrimp__lobster__crab_and_oysters__foodCode_40078	Shellfish (shrimp, lobster, crab and oysters, clams, mussels, snails)				Yes
Smoothie__alternative_nondairy_based_foodCode_120756					No
Smoothie__alternative_nondairy_with_nut/protein_powder_added_foodCode_120759					No
Smoothie__dairy/yogurt_based_foodCode_120755					No
Smoothie__dairy/yogurt_with_nut/protein_powder_added_foodCode_120758					No
Smoothie__regular_with_nut/protein_powder_added_foodCode_120757					No
Smoothie_fruit_and/or_vegetable_foodCode_120754					No
Snack_bars_such_as_Lara_bars__KIND_bars__Luna_bars_foodCode_120736					No
Sorbet_foodCode_120732					No
Sour_cream__regular__Fats_on_potatoes__rice__noodles_and_beans__foodCode_10008					No
Sour_cream__regular__Fats_used_on_vegetables__foodCode_10008					No
Soy__coconut_or_other_nondairy_yogurt_foodCode_120779					No
Soy_cheese_foodCode_120195					No
Soy_crackers_foodCode_120203					No
Soy_ice_cream_foodCode_120200					No
Soy_milk__Decaf_latte__cappuccino_and_mocha__foodCode_120785					No
Soy_milk__Latte__cappuccino_and_mocha__foodCode_120821					No
Soy_milk__all_types___Hot_chocolate__foodCode_120797					No
Soy_milk__fortified__Coffee__foodCode_120560					No
Soy_milk__fortified__Milk_as_a_beverage__foodCode_120560					No
Soy_milk__fortified__Milk_in_cooked_cereal__foodCode_120560					No
Soy_milk__fortified__Milk_on_cold_cereal__foodCode_120560					No
Soy_milk__fortified__Milk_on_cooked_cereal__foodCode_120560					No
Soy_milk__fortified__Tea__foodCode_120560					No
Soy_milk__nonfat__Alternative_nondairy_milk_as_a_beverage__foodCode_120205	Soy milk, nonfat				No
Soy_milk__nonfat__Coffee__foodCode_120205	Soy milk, nonfat				No
Soy_milk__nonfat__Milk_on_cold_cereal__foodCode_120205	Soy milk, nonfat				No
Soy_milk__nonfat__Milk_on_cooked_cereal__foodCode_120205	Soy milk, nonfat				No
Soy_milk__not_fortified__Coffee__foodCode_120561					No
Soy_milk__not_fortified__Milk_on_cold_cereal__foodCode_120561					No
Soy_milk__not_fortified__Milk_on_cooked_cereal__foodCode_120561					No
Soy_milk__not_fortified__Tea__foodCode_120561					No
Soy_milk__not_fortified___Milk_as_a_beverage__foodCode_120561					No
Soy_milk__regular_and_low_fat__Alternative_nondairy_milk_as_a_beverage__foodCode_120204	Soy milk, regular and low fat				No
Soy_milk__regular_and_low_fat__Coffee__foodCode_120204	Soy milk, regular and low fat				No
Soy_milk__regular_and_low_fat__Green__black_or_white_tea__foodCode_120204	Soy milk, regular and low fat				No
Soy_milk__regular_and_low_fat__Herbal_tea__foodCode_120204	Soy milk, regular and low fat				No
Soy_milk__regular_and_low_fat__Iced_coffee__foodCode_120204	Soy milk, regular and low fat				No
Soy_milk__regular_and_low_fat__Milk_in_cooked_cereal__foodCode_120204	Soy milk, regular and low fat				No
Soy_milk__regular_and_low_fat__Milk_on_cold_cereal__foodCode_120204	Soy milk, regular and low fat				No
Soy_milk__regular_and_low_fat__Milk_on_cooked_cereal__foodCode_120204	Soy milk, regular and low fat				No
Soy_sauce__tamari__teriyaki_sauce__Szechwan_sauce_and_natto_foodCode_120198					No
Soy_sauce__tamari__teriyaki_sauce_or_Szechwan_sauce_foodCode_120227	Soy sauce, tamari, teriyaki sauce, Szechwan sauce, worcester sauce				No
Soy_yogurt_foodCode_120196					No
Spaghetti__lasagna_and_other_pasta_with_meat_sauce_foodCode_40016					No
Spaghetti__lasagna_and_other_pasta_with_tomato_sauce__and_no_meat__foodCode_40017					No
Spaghetti__lasagna_and_other_pasta_with_tomato_sauce__whole_wheat_and_no_meat__foodCode_120491					No
Spaghetti__lasagna_and_other_pastas_with_meat_sauce__whole_wheat__foodCode_120490					No
Spaghetti_and_other_pasta_with_cheese_or_cream_sauce__including_macaroni_and_cheese__whole_wheat__foodCode_120492					No
Spaghetti_and_other_pasta_with_cheese_or_cream_sauce__including_macaroni_and_cheese_foodCode_40015					No
Spaghetti_and_other_pasta_with_oil__cheese_or_cream_sauce__including_macaroni_and_cheese__whole_wheat__foodCode_120492					No
Spaghetti_and_other_pasta_with_oil__cheese_or_cream_sauce__including_macaroni_and_cheese_foodCode_40015					No
Spaghetti_or_other_pastas_with_oil_or_pesto_sauces__white__foodCode_120750					No
Spaghetti_or_other_pastas_with_oil_or_pesto_sauces__whole_wheat__foodCode_120751					No
Sports_bar_and_meal_replacement_bar_containing_soy_foodCode_120188					No
Sports_drinks__hydration_powders_or_tablets_such_as_Gatorade__Powerade__Skratch_and_Cytomax_foodCode_120734					No
Sports_energy_bars_such_as_PowerBar__Clif_Bar_and_Honey_Stinger_Waffles_foodCode_60021					No
Sports_or_meal_replacement_bars_such_as_Power_Bars_and_Cliff_Bars_foodCode_60021					No
Standard_cold_cereals_foodCode_120409					No
Stew__pot_pie__curries_and_casseroles_with_meat_or_chicken_foodCode_40004					No
Sugar__Coffee__foodCode_60037	Jam, jelly, honey, syrup or sugar on bread, pancakes or waffles				Yes
Sugar__Espresso__foodCode_60037	Jam, jelly, honey, syrup or sugar on bread, pancakes or waffles				Yes
Sugar__Green__black_or_white_tea__foodCode_60037	Jam, jelly, honey, syrup or sugar on bread, pancakes or waffles				Yes
Sugar__Herbal_tea__foodCode_60037	Jam, jelly, honey, syrup or sugar on bread, pancakes or waffles				Yes
Sugar__Hot_beverages_made_with_milk__foodCode_60037	Jam, jelly, honey, syrup or sugar on bread, pancakes or waffles				Yes
Sugar__Iced_coffee__foodCode_60037	Jam, jelly, honey, syrup or sugar on bread, pancakes or waffles				Yes
Sugar__Latte__cappuccino_or_mocha__foodCode_60037	Jam, jelly, honey, syrup or sugar on bread, pancakes or waffles				Yes
Sugar__Tea__foodCode_60037	Jam, jelly, honey, syrup or sugar on bread, pancakes or waffles				Yes
Sugar_free_or_lower_calorie_sports_drinks__hydration_powders_or_tablets_such_as_Gatorade_G2__Powerade_Zero_and_Nuun_foodCode_120735					No
Summer_squash_and_zucchini_foodCode_30046	Summer squash, zucchini, eggplants, cucumbers				Yes
Sushi_such_as_tuna__salmon_and_California_roll_foodCode_120816					No
Sweet_tea_and_bottled_sweetened_tea_drinks_foodCode_120541	Sweet tea and bottled sweetened tea drinks				No
Sweetened_cold_cereals_foodCode_120403	Sweetened cold cereals				No
Tamales_with_meat_foodCode_120770					No
Tempeh_foodCode_120207					No
Tofu_foodCode_120206	Tofu				No
Tofu_or_soy_breakfast_sausage_or_other_breakfast_meat_foodCode_120190					No
Tofu_or_soy_chicken_or_turkey_foodCode_120193					No
Tofu_or_soy_cold_cuts__hot_dogs_or_deli_substitute_foodCode_120192					No
Tomato_juice__V_8_and_other_vegetable_juice_foodCode_90028	Commercial fruit juices				Yes
Turkey_bacon_or_low_fat_breakfast_sausage_foodCode_120763	Bacon and breakfast sausage				Yes
Vegetable__minestrone_and_tomato_soup_foodCode_40033	Soups and creams				Yes
Vegetable_pancakes_foodCode_120866					No
Vegetable_shortening__Fat_used_in_cooking__foodCode_120246					No
Vegetarian_burritos_or_fajitas_foodCode_120767					No
Vegetarian_enchiladas__tacos_or_tostadas_foodCode_120771					No
Vegetarian_pupusas_or_empanadas_foodCode_120775					No
Vegetarian_quesadillas_foodCode_120105					No
Vegetarian_sushi_such_as_avocado_and_cucumber_roll_foodCode_120764					No
Vegetarian_tamales_foodCode_120769					No
Veggie_soy_or_tofu_burgers_or_ground_meat_substitute_foodCode_120191					No
Water__tap_or_bottled__foodCode_90017	Water (tap or bottled)				No
Watermelon_and_red_melon_foodCode_20023	Watermelon and red melon				Yes
White_Rice_foodCode_120414	Rice and pasta				No
White_breads__including_bagels__rolls_and_English_muffins_foodCode_60002	White breads, including bagels, rolls and English muffins				Yes
White_fish__broiled_or_baked__such_as_sole__halibut__snapper_and_cod_foodCode_40073	White fish such as sole, halibut, snapper and cod				Yes
White_flour_tortillas_foodCode_120761					No
White_or_rose_wine_foodCode_90019	White, ros√©, muscatel and rice wine				No
Whole_grain_breads__including_bagels_and_rolls__100__Whole_Grains__foodCode_120412	Whole grain breads, including bagels and rolls				No
Whole_grain_breads__including_bagels_and_rolls_foodCode_120413	Whole grain breads, including bagels and rolls				No
Whole_grain_flour_tortillas_foodCode_120762					No
Whole_grain_pancakes__French_toast_or_waffles_foodCode_120760					No
Whole_kernel_grains_such_as_brown_rice_foodCode_120415	Rice and pasta				No
Whole_milk__Decaf_latte__cappuccino_and_mocha__foodCode_120781					No
Whole_milk__Hot_chocolate__foodCode_120793					No
Whole_milk__Latte__cappuccino_and_mocha__foodCode_120817					No
Winter_squash_such_as_acorn__butternut_and_pumpkin_foodCode_30047	Carrots and winter squash				Yes
Yams_and_sweet_potatoes_foodCode_30048	Yams, sweet potatoes and taro				No
Yogurt__all_types_except_frozen_foodCode_70017					No
Yogurt__plain__full_fat_foodCode_120705	Yogurt				Yes
Yogurt__plain__lowfat_foodCode_120706	Yogurt				Yes
Yogurt__plain__nonfat_foodCode_120707	Yogurt				Yes
Yogurt__sweetened_or_with_fruit__full_fat_foodCode_120708	Yogurt				Yes
Yogurt__sweetened_or_with_fruit__lowfat_foodCode_120709	Yogurt				Yes
Yogurt__sweetened_or_with_fruit__nonfat_foodCode_120710	Yogurt				Yes
Yogurt_drink___low_fat_with_fruit__vitalinea_fruit__alpura_light__lala_light__foodCode_120847					No
Yogurt_drink___with_fruit__whole_milk__foodCode_120846					No
Zero_calorie_flavored_waters_such_as_Bai__hint__La_Croix_and_VitaminWater_Zero_foodCode_120739					No

## Sheet: Table S2 Nutrients
Parameter	Japan	Mexico	Spain	UK	US	Statistic	Q-value
Vitamin C	0.068 ± 0.013	0.098 ± 0.066	0.071 ± 0.029	0.095 ± 0.051	0.082 ± 0.049	78.419	3.77e-16
Alcohol	0.003 ± 0.005	0.003 ± 0.005	0.002 ± 0.002	0.006 ± 0.008	0.005 ± 0.007	91.891	5.4e-19
Calories	1757.161 ± 166.074	2289.243 ± 898.876	2075.074 ± 796.898	2011.354 ± 690.252	2018.798 ± 678.109	100.87	6.88e-21
Vitamin D	0.005 ± 0.001	0.004 ± 0.002	0.005 ± 0.003	0.004 ± 0.002	0.003 ± 0.002	275.461	2.36e-58
Protein	0.040 ± 0.001	0.042 ± 0.008	0.049 ± 0.011	0.038 ± 0.008	0.040 ± 0.009	318.149	1.52e-67
Cholestrol	0.165 ± 0.010	0.163 ± 0.081	0.195 ± 0.118	0.128 ± 0.087	0.131 ± 0.095	319.537	7.92e-68
Potassium	1.581 ± 0.160	1.696 ± 0.471	2.015 ± 0.402	1.898 ± 0.457	1.666 ± 0.405	351.861	8.69e-75
Folate	0.223 ± 0.030	0.202 ± 0.057	0.169 ± 0.049	0.224 ± 0.067	0.219 ± 0.064	356.91	7.37e-76
Saturated Fat	0.010 ± 0.001	0.012 ± 0.003	0.014 ± 0.003	0.013 ± 0.005	0.013 ± 0.004	390.409	4.48e-83
Riboflavin	0.001 ± 0.000	0.001 ± 0.000	0.001 ± 0.000	0.001 ± 0.000	0.001 ± 0.000	395.794	3.22e-84
Phosphorus	0.609 ± 0.042	0.763 ± 0.121	0.676 ± 0.117	0.697 ± 0.115	0.693 ± 0.125	426.166	9.25e-91
Polyunsaturated Fat	0.007 ± 0.000	0.008 ± 0.002	0.010 ± 0.003	0.009 ± 0.002	0.009 ± 0.002	452.375	2.1e-96
Zinc	0.005 ± 0.000	0.006 ± 0.001	0.006 ± 0.001	0.005 ± 0.001	0.006 ± 0.001	498.137	2.82e-106
Thiamin	0.001 ± 0.000	0.001 ± 0.000	0.001 ± 0.000	0.001 ± 0.000	0.001 ± 0.000	583.686	9.28e-125
Fiber (Water-Insoluble)	0.006 ± 0.001	0.010 ± 0.003	0.010 ± 0.004	0.011 ± 0.004	0.011 ± 0.004	621.725	5.77e-133
Calcium	0.334 ± 0.052	0.557 ± 0.158	0.492 ± 0.150	0.565 ± 0.165	0.545 ± 0.195	683.741	2.31e-146
Lycopene	1.033 ± 0.255	3.586 ± 1.832	1.712 ± 1.223	2.736 ± 1.716	2.634 ± 1.836	720.076	3.36e-154
Selenium	0.042 ± 0.001	0.059 ± 0.012	0.044 ± 0.012	0.055 ± 0.012	0.057 ± 0.013	720.917	2.38e-154
Total Fiber	0.008 ± 0.001	0.014 ± 0.005	0.014 ± 0.005	0.016 ± 0.006	0.015 ± 0.005	721.97	1.52e-154
Magnesium	0.164 ± 0.014	0.190 ± 0.046	0.267 ± 0.067	0.208 ± 0.046	0.198 ± 0.045	740.732	1.44e-158
Total Fat	0.032 ± 0.002	0.039 ± 0.007	0.048 ± 0.009	0.040 ± 0.010	0.042 ± 0.009	791.702	1.44e-169
Vitamin B12	0.004 ± 0.000	0.002 ± 0.001	0.002 ± 0.001	0.002 ± 0.001	0.002 ± 0.001	911.163	2.12e-195
Sodium	2.160 ± 0.083	1.881 ± 0.499	1.295 ± 0.368	1.818 ± 0.581	1.914 ± 0.602	911.19	2.12e-195
Fiber (Water-Soluble)	0.002 ± 0.000	0.004 ± 0.001	0.004 ± 0.001	0.005 ± 0.002	0.004 ± 0.002	945.569	9.55e-203
Carbohydrates	0.143 ± 0.004	0.122 ± 0.020	0.090 ± 0.022	0.119 ± 0.026	0.114 ± 0.025	953.314	2.34e-204
Vitamin B6	0.001 ± 0.000	0.001 ± 0.000	0.001 ± 0.000	0.001 ± 0.000	0.001 ± 0.000	973.57	1.14e-208
Monounsaturated Fat	0.012 ± 0.000	0.014 ± 0.004	0.024 ± 0.006	0.015 ± 0.005	0.016 ± 0.005	984.099	7.47e-211
Iron	0.005 ± 0.001	0.007 ± 0.001	0.009 ± 0.002	0.007 ± 0.002	0.007 ± 0.002	1016.05	1.19e-217
Niacin	0.010 ± 0.001	0.019 ± 0.004	0.015 ± 0.003	0.018 ± 0.003	0.020 ± 0.005	1167.74	2.36e-250
Isoflavones	0.013 ± 0.009	0.001 ± 0.002	0.000 ± 0.000	0.004 ± 0.006	0.005 ± 0.009	1458.25	<1.00E-300
Table S2. Nutrient profiles per country, standardized by total calorie intake

## Sheet: Table S3 Foods
Parameter	Japan	Mexico	Spain	UK	US	Statistic	Q-value
Ketchup	0.000 ± 0.001	0.001 ± 0.003	0.000 ± 0.001	0.001 ± 0.003	0.001 ± 0.004	20.244	0.000447
100% Fruit Juice such as Apple, Grape and Cran...	0.003 ± 0.016	0.001 ± 0.007	0.002 ± 0.008	0.004 ± 0.019	0.005 ± 0.021	25.04	5.02e-05
Corn, Soybean, Peanut, Sesame and Sunflower Oil	0.001 ± 0.002	0.001 ± 0.002	0.000 ± 0.001	0.000 ± 0.000	0.000 ± 0.000	26.626	2.45e-05
Margarine	0.001 ± 0.003	0.000 ± 0.001	0.000 ± 0.001	0.001 ± 0.002	0.000 ± 0.001	36.031	3e-07
Eggs	0.021 ± 0.039	0.021 ± 0.022	0.015 ± 0.012	0.015 ± 0.019	0.016 ± 0.023	37.249	1.72e-07
Jam, Jelly, Honey, Syrup or Sugar	0.002 ± 0.004	0.003 ± 0.006	0.002 ± 0.004	0.002 ± 0.004	0.002 ± 0.004	41.37	2.46e-08
Oranges, Grapefruit and Tangerines (Not Juice)	0.015 ± 0.026	0.015 ± 0.030	0.020 ± 0.030	0.020 ± 0.035	0.015 ± 0.026	46.12	2.58e-09
Potato, Tortilla Chips, Corn Chips and Puffs	0.004 ± 0.006	0.002 ± 0.005	0.002 ± 0.003	0.003 ± 0.005	0.004 ± 0.006	46.65	2.04e-09
Beer	0.043 ± 0.100	0.034 ± 0.083	0.026 ± 0.040	0.025 ± 0.071	0.037 ± 0.080	48.015	1.08e-09
Bacon and Breakfast Sausage	0.001 ± 0.002	0.001 ± 0.001	0.001 ± 0.002	0.001 ± 0.003	0.001 ± 0.002	63.62	5.91e-13
Grapes	0.003 ± 0.004	0.005 ± 0.008	0.010 ± 0.015	0.008 ± 0.015	0.005 ± 0.009	76.163	1.36e-15
Liquor and Mixed Drinks	0.006 ± 0.019	0.002 ± 0.007	0.000 ± 0.001	0.003 ± 0.009	0.004 ± 0.010	97.155	4.86e-20
Coffee	0.096 ± 0.117	0.091 ± 0.160	0.029 ± 0.031	0.119 ± 0.196	0.128 ± 0.184	97.42	4.35e-20
Cookies and Cakes	0.003 ± 0.004	0.004 ± 0.005	0.002 ± 0.005	0.005 ± 0.010	0.004 ± 0.007	99.657	1.49e-20
Low and Nonfat Milk	0.017 ± 0.082	0.026 ± 0.068	0.049 ± 0.078	0.031 ± 0.055	0.021 ± 0.061	100.939	8.1e-21
100% Orange Juice and Grapefruit Juice	0.004 ± 0.011	0.009 ± 0.026	0.006 ± 0.017	0.008 ± 0.023	0.004 ± 0.017	106.754	4.78e-22
Apples, Applesauce and Pears	0.011 ± 0.016	0.023 ± 0.028	0.027 ± 0.034	0.034 ± 0.039	0.023 ± 0.029	119.045	1.17e-24
Organ Meats	0.001 ± 0.001	0.000 ± 0.001	0.001 ± 0.005	0.000 ± 0.002	0.000 ± 0.001	125.331	5.41e-26
Onions and Leeks	0.019 ± 0.020	0.012 ± 0.015	0.022 ± 0.021	0.022 ± 0.022	0.016 ± 0.019	127.109	2.31e-26
Bananas	0.009 ± 0.015	0.018 ± 0.019	0.019 ± 0.019	0.021 ± 0.023	0.019 ± 0.025	127.654	1.81e-26
Ice Cream and Milkshakes	0.009 ± 0.012	0.004 ± 0.009	0.005 ± 0.016	0.005 ± 0.010	0.009 ± 0.016	129.092	9.14e-27
Canned Fish and Shellfish	0.003 ± 0.004	0.006 ± 0.010	0.006 ± 0.007	0.004 ± 0.006	0.005 ± 0.008	134.626	6.14e-28
Sweets and Confectionery	0.005 ± 0.007	0.002 ± 0.004	0.004 ± 0.006	0.005 ± 0.006	0.003 ± 0.005	142.877	1.08e-29
Carrots and Winter Squash	0.011 ± 0.013	0.012 ± 0.015	0.015 ± 0.015	0.026 ± 0.027	0.019 ± 0.025	172.248	5.58e-36
Mayonnaise	0.001 ± 0.003	0.001 ± 0.002	0.000 ± 0.001	0.001 ± 0.002	0.001 ± 0.002	179.048	1.99e-37
Red Wine	0.006 ± 0.025	0.011 ± 0.026	0.004 ± 0.008	0.025 ± 0.045	0.014 ± 0.037	186.072	6.34e-39
Lunch Meats	0.001 ± 0.002	0.005 ± 0.007	0.003 ± 0.004	0.002 ± 0.004	0.003 ± 0.007	189.404	1.26e-39
White, Rosé, Muscatel and Rice Wine	0.002 ± 0.009	0.002 ± 0.006	0.003 ± 0.007	0.014 ± 0.030	0.009 ± 0.026	197.939	1.89e-41
Leafy Greens	0.006 ± 0.006	0.015 ± 0.026	0.019 ± 0.019	0.018 ± 0.021	0.021 ± 0.024	217.557	1.18e-45
Regular Soft Drinks (Not Diet)	0.042 ± 0.114	0.021 ± 0.055	0.005 ± 0.027	0.002 ± 0.010	0.007 ± 0.049	222.501	1.05e-46
Commercial Fruit Juices	0.020 ± 0.038	0.000 ± 0.003	0.003 ± 0.021	0.001 ± 0.007	0.004 ± 0.022	239.099	2.9e-50
Berries such as Strawberries and Blueberries	0.004 ± 0.006	0.011 ± 0.018	0.004 ± 0.004	0.028 ± 0.038	0.026 ± 0.039	244.292	2.28e-51
Cheese	0.005 ± 0.011	0.008 ± 0.009	0.016 ± 0.013	0.011 ± 0.012	0.012 ± 0.014	248.566	2.84e-52
Shellfish	0.002 ± 0.002	0.002 ± 0.003	0.004 ± 0.003	0.001 ± 0.003	0.001 ± 0.003	265.597	6.3e-56
Mushrooms	0.006 ± 0.006	0.004 ± 0.006	0.014 ± 0.017	0.008 ± 0.010	0.005 ± 0.009	277.964	1.41e-58
Butter or Ghee	0.001 ± 0.004	0.001 ± 0.003	0.001 ± 0.001	0.003 ± 0.004	0.003 ± 0.003	290.597	2.77e-61
Muffins, Scones, Croissants and Biscuits	0.004 ± 0.006	0.007 ± 0.011	0.007 ± 0.010	0.004 ± 0.008	0.002 ± 0.004	290.95	2.43e-61
Yogurt	0.099 ± 0.156	0.018 ± 0.026	0.027 ± 0.032	0.030 ± 0.034	0.019 ± 0.029	294.359	4.66e-62
Cruciferous Vegetables	0.025 ± 0.025	0.010 ± 0.017	0.017 ± 0.022	0.028 ± 0.028	0.022 ± 0.029	295.242	3.14e-62
Watermelon and Red Melon	0.002 ± 0.005	0.005 ± 0.013	0.009 ± 0.014	0.001 ± 0.004	0.004 ± 0.014	321.672	6.53e-68
Cherries, Picotas, Plums, Peaches, Nectarines,...	0.001 ± 0.002	0.005 ± 0.016	0.015 ± 0.018	0.004 ± 0.011	0.005 ± 0.013	328.598	2.19e-69
White Fish	0.007 ± 0.012	0.005 ± 0.010	0.012 ± 0.019	0.005 ± 0.008	0.003 ± 0.008	335.745	6.62e-71
Whole Milk	0.074 ± 0.166	0.027 ± 0.063	0.017 ± 0.048	0.012 ± 0.034	0.008 ± 0.031	346.447	3.42e-73
Summer Squash, Zucchini, Eggplants, Cucumbers	0.006 ± 0.009	0.007 ± 0.014	0.017 ± 0.017	0.007 ± 0.012	0.007 ± 0.012	349.74	7.04e-74
Potatoes	0.005 ± 0.005	0.008 ± 0.010	0.019 ± 0.016	0.024 ± 0.026	0.012 ± 0.023	364.756	4.28e-77
Dark Fish	0.008 ± 0.008	0.003 ± 0.007	0.011 ± 0.010	0.008 ± 0.010	0.005 ± 0.008	374.808	3.08e-79
Peppers Cooked and Raw	0.002 ± 0.002	0.011 ± 0.019	0.015 ± 0.015	0.019 ± 0.022	0.013 ± 0.021	384.82	2.27e-81
Tea	0.085 ± 0.116	0.075 ± 0.166	0.015 ± 0.026	0.309 ± 0.287	0.113 ± 0.183	391.844	7.42e-83
Processed Meats	0.003 ± 0.009	0.001 ± 0.002	0.002 ± 0.003	0.000 ± 0.002	0.001 ± 0.004	422.577	1.84e-89
Chicken and Turkey	0.011 ± 0.011	0.011 ± 0.012	0.033 ± 0.027	0.008 ± 0.010	0.011 ± 0.014	423.204	1.47e-89
Garlic	0.000 ± 0.000	0.001 ± 0.001	0.000 ± 0.000	0.001 ± 0.001	0.001 ± 0.001	444.895	3.31e-94
Fresh Tomatoes	0.007 ± 0.011	0.029 ± 0.035	0.038 ± 0.032	0.036 ± 0.040	0.018 ± 0.022	467.956	3.8e-99
Beef, Pork, Ham and Lamb	0.025 ± 0.045	0.015 ± 0.015	0.022 ± 0.017	0.007 ± 0.011	0.007 ± 0.012	519.566	2.94e-110
Green or String Beans	0.000 ± 0.001	0.003 ± 0.006	0.015 ± 0.015	0.007 ± 0.012	0.004 ± 0.008	560.016	5.97e-119
White Breads	0.030 ± 0.049	0.004 ± 0.007	0.009 ± 0.014	0.005 ± 0.010	0.004 ± 0.010	565.587	4.34e-120
Peanut Butter, Peanuts and Other Nuts and Seeds	0.001 ± 0.005	0.001 ± 0.003	0.013 ± 0.012	0.007 ± 0.011	0.009 ± 0.010	738.181	2.26e-157
Olive Oil	0.001 ± 0.002	0.002 ± 0.004	0.012 ± 0.008	0.004 ± 0.006	0.004 ± 0.007	824.332	6.18e-176
Soups and Creams	0.067 ± 0.060	0.045 ± 0.040	0.002 ± 0.004	0.029 ± 0.039	0.034 ± 0.045	861.841	6.17e-184
Salt	0.002 ± 0.001	0.000 ± 0.001	0.001 ± 0.001	0.000 ± 0.001	0.000 ± 0.001	885.491	6.95e-189
Rice, Pasta and Noodles	0.053 ± 0.044	0.000 ± 0.001	0.015 ± 0.013	0.015 ± 0.014	0.019 ± 0.021	1006.47	8.47e-215
Table S3. Food profiles per country, standardized by total calorie intake

## Sheet: Table S4 Prevalence Table
Enriched Taxa	Coverage	Japan CLR	Japan RA	Japan Prev	Mexico CLR	Mexico RA	Mexico Prev	Spain CLR	Spain RA	Spain Prev	UK CLR	UK RA	UK Prev	US CLR	US RA	US Prev
s__Bacillus subtilis;G000747645	99.7316	1.45756	0.000141514	0.658537	-2.37001	1.85614e-08	0.09068	-2.28096	2.34562e-08	0.064444	-2.0066	1.05563e-07	0.068182	-1.95524	8.27487e-08	0.082725
s__Bacillus subtilis;G000696615	85.1857	1.1292	8.31828e-05	0.631707	-2.36904	1.9183e-08	0.088161	-2.28812	2.02179e-08	0.057778	-2.00187	8.40235e-08	0.074675	-1.95988	5.79756e-08	0.080292
s__Bacillus subtilis;G900110305	83.0138	1.11489	8.22949e-05	0.631707	-2.36831	1.84924e-08	0.09068	-2.28768	2.0104e-08	0.06	-2.00456	8.03757e-08	0.068182	-1.95596	5.62834e-08	0.075426
s__Bacillus spizizenii;G000740655	42.9593	0.11002	1.39381e-05	0.519512	-2.42405	5.77371e-10	0.005038	-2.33006	3.65904e-09	0.02	-2.05127	1.25444e-08	0.029221	-1.94588	4.2127e-08	0.026764
s__Bacillus cabrialesii;G001663575	38.6412	0.049235	1.26627e-05	0.490244	-2.41817	2.11959e-09	0.010076	-2.32566	3.82832e-09	0.013333	-2.06158	9.97939e-09	0.016234	-1.94581	4.07293e-08	0.026764
s__Bacillus velezensis;G001687195	4.58474	-1.04079	1.29813e-06	0.358537	-2.42144	1.55238e-09	0.010076	-2.32866	7.5266e-09	0.022222	-2.08521	3.24651e-09	0.022727	-1.97935	8.0762e-09	0.029197
s__Bacillus amyloliquefaciens;G000196735	3.99932	-1.3319	5.17062e-07	0.326829	-2.42045	2.90962e-09	0.025189	-2.31773	2.95761e-08	0.051111	-2.09538	1.43343e-09	0.019481	-2.00155	3.36407e-09	0.034063
s__Bacillus velezensis;G001461825	4.43353	-1.37836	4.64277e-07	0.3	-2.42379	1.47209e-09	0.012594	-2.33797	2.47284e-09	0.02	-2.08799	2.32369e-09	0.016234	-1.9751	8.4706e-09	0.026764
s__Bacillus velezensis;G001517185	4.30949	-1.49816	3.17706e-07	0.273171	-2.42443	5.22718e-10	0.005038	-2.32976	4.58062e-09	0.017778	-2.0848	2.43505e-09	0.012987	-1.97809	7.2575e-09	0.021898
s__Bacillus velezensis;G001617995	4.45805	-1.47487	3.37764e-07	0.273171	-2.42504	2.40893e-10	0.002519	-2.33583	2.5413e-09	0.015556	-2.08702	1.35227e-09	0.006494	-1.979	7.56756e-09	0.024331
s__Bacillus velezensis;G001587325	4.13793	-1.51263	2.99028e-07	0.268293	-2.4239	5.89231e-10	0.005038	-2.33708	2.93211e-09	0.02	-2.08702	1.35227e-09	0.006494	-1.9823	7.36941e-09	0.026764
s__Bacillus velezensis;G900156245	4.3072	-1.54504	2.6116e-07	0.258537	-2.42523	4.46516e-10	0.005038	-2.33516	2.16945e-09	0.013333	-2.08394	1.73128e-09	0.006494	-1.97838	7.29139e-09	0.021898
s__Bacillus velezensis;G000740715	4.32689	-1.51824	3.03179e-07	0.253659	-2.42687	3.48088e-10	0.005038	-2.33398	2.30471e-09	0.013333	-2.08646	1.11179e-09	0.003247	-1.97573	7.72394e-09	0.024331			0.000142
s__Bacillus velezensis;G001440465	4.43818	-1.61769	1.92915e-07	0.246341	-2.4252	6.69717e-10	0.007557	-2.3351	1.98084e-09	0.011111	-2.08553	1.48239e-09	0.003247	-1.96741	1.27777e-08	0.024331			0
s__Bacillus velezensis;G001975995	4.0183	-1.6084	1.90841e-07	0.246341	-2.4241	7.93719e-10	0.007557	-2.33523	2.84964e-09	0.013333	-2.08646	1.11179e-09	0.003247	-1.97519	8.02354e-09	0.024331
s__Bacillus velezensis;G000746035	4.31109	-1.57912	2.36442e-07	0.243902	-2.42504	2.40893e-10	0.002519	-2.33464	2.80611e-09	0.017778	-2.08702	1.35227e-09	0.006494	-1.98016	7.74882e-09	0.026764
s__Bacillus glycinifermentans;G900093775	1.27099	-1.62899	2.06662e-07	0.234146	-2.39933	1.05453e-08	0.032746	-2.33833	2.46789e-09	0.024444	-2.08376	3.43871e-09	0.022727	-1.99768	1.5792e-09	0.012165
s__Bacillus pumilus;G001578205	1.12299	-1.79729	9.51704e-08	0.182927	-2.42363	8.24437e-10	0.007557	-2.34138	1.36333e-09	0.017778	-2.0879	1.52666e-09	0.012987	-1.99777	1.5242e-09	0.007299
s__Novosphingobium nitrogenifigens;G000192575	1.86371	-1.70168	1.17655e-07	0.204878	-2.37801	1.91667e-08	0.052897	-2.30423	1.7688e-08	0.055556	-2.06435	1.51191e-08	0.022727	-1.9551	3.33409e-08	0.048662			0.658537
s__Agrobacterium arsenijevicii;G000949895	12.9251	-1.9587	3.33278e-08	0.056098	-1.46813	5.56393e-07	0.518892	-2.25924	3.78451e-08	0.104444	-2.08162	4.74759e-09	0.032468	-1.96491	3.73235e-08	0.068127			0
s__Limnospira fusiformis;G000307915	76.3473	-1.92666	1.22367e-07	0.05122	-1.22375	1.44038e-06	0.556675	-2.11415	1.43483e-07	0.173333	-1.87739	3.86946e-06	0.097403	-1.85517	1.50702e-07	0.087591
s__Enterococcus_B faecalis_A;G000415185	1.51497	-1.9185	6.15229e-08	0.065854	-1.92884	3.33848e-07	0.299748	-2.28347	2.24318e-08	0.057778	-2.0481	1.81499e-08	0.032468	-1.96937	1.87713e-08	0.034063
s__Enterococcus_J nangangensis;G005405245	1.05417	-1.96812	2.2803e-08	0.058537	-2.09707	1.22578e-07	0.304786	-2.30823	2.11061e-08	0.08	-2.08474	8.45768e-09	0.055195	-1.98075	8.87059e-09	0.051095
s__Enterococcus_A hermanniensis;G001885945	2.96479	-1.8502	1.46494e-07	0.102439	-1.93327	3.48579e-07	0.312343	-2.29371	2.42236e-08	0.066667	-2.04715	2.95312e-08	0.051948	-1.9638	1.81433e-08	0.038929
s__Atopococcus tabaci;G000429585	1.26112	-1.99098	1.58894e-08	0.031707	-2.15645	1.00692e-07	0.2267	-2.3139	2.71723e-08	0.042222	-2.0496	1.69323e-08	0.038961	-1.96078	2.36125e-08	0.051095
s__Lacticaseibacillus pantheris;G001311175	69.9422	-1.99644	1.17642e-08	0.043902	-2.14294	1.29862e-07	0.229219	-2.30521	1.33852e-08	0.068889	-2.08825	2.5428e-09	0.022727	-1.96423	4.40496e-06	0.051095
s__Lacticaseibacillus pantheris;G001435155	69.8604	-2.00309	9.69859e-09	0.036585	-2.1393	1.31246e-07	0.231738	-2.30031	1.45767e-08	0.075556	-2.08724	3.17258e-09	0.025974	-1.96508	4.45205e-06	0.048662
s__Weissella minor;G001437425	1.24481	-2.0314	8.96791e-10	0.007317	-2.2759	8.14864e-08	0.120907	-2.3109	9.11226e-09	0.031111	-2.07959	7.39366e-09	0.006494	-1.99921	8.81785e-10	0.004866
s__Companilactobacillus farciminis;G000184535	2.79068	-2.02213	3.66209e-09	0.012195	-2.30155	4.27583e-08	0.088161	-2.33853	4.70793e-10	0.006667	-2.08787	2.8114e-09	0.012987	-1.9927	1.02443e-08	0.024331
s__Ochrobactrum anthropi;G001586735	6.19527	-2.01669	4.27568e-09	0.019512	-2.37364	1.53656e-08	0.075567	-2.32987	5.74571e-09	0.022222	-2.09106	2.69955e-10	0.003247	-2.00078	2.38411e-09	0.019465
s__UBA1436 sp902794895;G902794895	1.02404	-2.02028	4.79964e-08	0.002439	-2.16565	2.69495e-06	0.060453	-2.27119	4.20584e-07	0.013333	-2.0695	2.10943e-08	0.00974	-1.99063	2.16405e-08	0.002433
s__Helicobacter_D apodemus;G000765745	1.00366	-2.03349	0	0	-2.36795	2.97734e-08	0.040302	-2.33587	0	0	-2.09088	0	0	-2.00363	1.03482e-10	0.002433
s__GCF-000787395 sp000787395;G002021855	1.04013	-2.01296	9.01937e-08	0.007317	-2.34144	2.87821e-07	0.042821	-2.33675	1.31752e-10	0.002222	-2.09558	6.71179e-11	0.003247	-2.00364	3.19147e-10	0.004866
s__Acinetobacter marinus;G900096915	2.23658	-2.02362	2.94505e-09	0.007317	-2.36718	2.07184e-08	0.047859	-2.33306	2.30724e-09	0.015556	-2.08064	9.31777e-08	0.012987	-2.00069	1.5516e-09	0.014599
s__Salinivibrio socompensis;G000513715	1.47555	-2.01176	1.45928e-07	0.009756	-2.36964	3.88181e-08	0.042821	-2.33306	1.54751e-09	0.008889	-2.09745	8.8848e-10	0.012987	-1.99542	6.95636e-09	0.004866
s__Aliiglaciecola lipolytica;G000314975	1.19577	-2.0096	3.52812e-07	0.004878	-2.40986	1.03992e-08	0.025189	-2.32512	1.25658e-08	0.004444	-2.09333	1.34236e-10	0.003247	-1.99843	1.52166e-09	0.007299
s__GCF-000787395 sp000787395;G002021105	1.2291	-2.01858	9.64938e-08	0.002439	-2.42317	1.1237e-09	0.010076	-2.33521	2.63505e-10	0.002222	-2.09633	5.32775e-11	0.003247	-2.00187	0	0
s__Bdellovibrio bacteriovorus_F;G000317895	3.03944	-2.03349	0	0	-2.38409	1.18115e-08	0.042821	-2.06933	2.22335e-07	0.157778	-2.01715	3.56946e-08	0.042208	-1.98428	6.0796e-09	0.024331
s__Bdellovibrio bacteriovorus;G000196175	4.20087	-2.03349	0	0	-2.37828	1.48993e-08	0.04534	-2.03548	3.01214e-07	0.162222	-2.03298	2.89651e-08	0.048701	-1.98902	5.53204e-09	0.024331
s__Bdellovibrio bacteriovorus;G000691605	4.00532	-2.03349	0	0	-2.3882	1.29136e-08	0.035264	-2.04104	3.00538e-07	0.162222	-2.03041	3.26593e-08	0.051948	-1.99132	4.95495e-09	0.024331
s__Sediminibacterium sp000515315;G000515315	1.20303	-2.03641	6.46271e-11	0.002439	-2.42526	0	0	-2.25321	4.73464e-08	0.108889	-2.09118	7.3966e-10	0.006494	-1.99981	1.03262e-09	0.007299
s__GCA-2401445 sp002401445;G002401445	1.11524	-2.03163	4.58762e-10	0.002439	-2.42567	1.88076e-10	0.002519	-2.30342	1.67266e-08	0.053333	-2.08909	4.94454e-10	0.003247	-2.00187	0	0
s__Methanoculleus sp002508705;G002508805	76.8821	-2.03349	0	0	-2.42526	0	0	-2.33587	0	0	-2.03179	3.69501e-05	0.016234	-1.99974	5.12525e-10	0.002433
s__;G900660535	1.2755	-2.03349	0	0	-2.42373	4.05668e-10	0.002519	-2.33555	5.81292e-10	0.004444	-2.05338	5.71243e-08	0.016234	-2.00225	1.82686e-10	0.002433
s__Buchnera aphidicola_A;G000225445	2.86684	-2.03113	5.62949e-10	0.002439	-2.41255	3.42972e-08	0.002519	-2.33587	0	0	-2.09748	1.31566e-09	0.016234	-2.00708	1.60849e-10	0.004866
s__Moheibacter sediminis;G900176425	1.47983	-2.02579	3.25162e-09	0.017073	-2.40271	7.51969e-09	0.047859	-2.33466	4.03675e-09	0.028889	-2.0744	1.33878e-08	0.045455	-1.9516	3.38045e-08	0.158151
s__Soonwooa buanensis;G900167905	1.51065	-1.92922	1.21448e-07	0.036585	-2.40637	5.34492e-09	0.027708	-2.34192	1.52064e-09	0.02	-2.09284	3.93906e-09	0.032468	-2.00379	2.13408e-08	0.114355
s__Aliarcobacter faecis;G000585155	1.0582	-2.03349	0	0	-2.41742	2.99214e-09	0.007557	-2.33807	2.51599e-10	0.004444	-2.08844	8.39314e-10	0.006494	-1.97343	1.23424e-08	0.024331
Table S4. Genome Coverage, Mean CLR, Mean Relative Abundance, and Prevalence of Enriched Taxa Per Country

## Sheet: Table S5 FPED Conversion
FNDDS food code	FNDDS food description	Shukei_o_AggregatedResult_Original_English	F_TOTAL (cup eq.)	F_CITMLB (cup eq.)	F_OTHER (cup eq.)	F_JUICE (cup eq.)	V_TOTAL (cup eq.)	V_DRKGR (cup eq.)	V_REDOR_TOTAL (cup eq.)	V_REDOR_TOMATO (cup eq.)	V_REDOR_OTHER (cup eq.)	V_STARCHY_TOTAL (cup eq.)	V_STARCHY_POTATO (cup eq.)	V_STARCHY_OTHER (cup eq.)	V_OTHER (cup eq.)	V_LEGUMES (cup eq.)	G_TOTAL (oz. eq.)	G_WHOLE (oz. eq.)	G_REFINED (oz. eq.)	PF_TOTAL (oz. eq.)	PF_MPS_TOTAL (oz. eq.)	PF_MEAT (oz. eq.)	PF_CUREDMEAT (oz. eq.)	PF_ORGAN (oz. eq.)	PF_POULT (oz. eq.)	PF_SEAFD_HI (oz. eq.)	PF_SEAFD_LOW (oz. eq.)	PF_EGGS (oz. eq.)	PF_SOY (oz. eq.)	PF_NUTSDS (oz. eq.)	PF_LEGUMES (oz. eq.)	D_TOTAL (cup eq.)	D_MILK (cup eq.)	D_YOGURT (cup eq.)	D_CHEESE (cup eq.)	OILS (grams)	SOLID_FATS (grams)	ADD_SUGARS (tsp. eq.)	A_DRINKS (no. of drinks)
Japan
93401100	Wine, rice	Sake	0	0	0	0	0	0	0	0	0	0	0	0	0	0	0	0	0	0	0	0	0	0	0	0	0	0	0	0	0	0	0	0	0	0	0	0	1.15
93505000	Vodka	shochu	0	0	0	0	0	0	0	0	0	0	0	0	0	0	0	0	0	0	0	0	0	0	0	0	0	0	0	0	0	0	0	0	0	0	0	0	2.39
93101000	Beer	Beer	0	0	0	0	0	0	0	0	0	0	0	0	0	0	0	0	0	0	0	0	0	0	0	0	0	0	0	0	0	0	0	0	0	0	0	0	0.28
93502000	Whiskey	whiskey	0	0	0	0	0	0	0	0	0	0	0	0	0	0	0	0	0	0	0	0	0	0	0	0	0	0	0	0	0	0	0	0	0	0	0	0	2.39
93401010	Wine, table, red	wine	0	0	0	0	0	0	0	0	0	0	0	0	0	0	0	0	0	0	0	0	0	0	0	0	0	0	0	0	0	0	0	0	0	0	0	0	0.76
56205000	Rice, cooked, NFS	rice	0	0	0	0	0	0	0	0	0	0	0	0	0	0	1.22	0	1.22	0	0	0	0	0	0	0	0	0	0	0	0	0	0	0	0	0	0	0	0
56205011	Rice, brown, cooked, NS as to fat	brown rice	0	0	0	0	0	0	0	0	0	0	0	0	0	0	1.21	1.21	0	0	0	0	0	0	0	0	0	0	0	0	0	0	0	0	0	0	0	0	0
56200500	Buckwheat groats, no added fat	wheat	0	0	0	0	0	0	0	0	0	0	0	0	0	0	1.21	1.21	0	0	0	0	0	0	0	0	0	0	0	0	0	0	0	0	0	0	0	0	0
56202000	Millet, no added fat	millet	0	0	0	0	0	0	0	0	0	0	0	0	0	0	1.21	1.21	0	0	0	0	0	0	0	0	0	0	0	0	0	0	0	0	0	0	0	0	0
41601070	Soybean soup, miso broth	miso soup	0	0	0	0	0.03	0	0	0	0	0	0	0	0.03	0.02	0	0	0	0.12	0.04	0	0	0	0	0	0.04	0	0.08	0	0.08	0	0	0	0	0.81	0	0	0
21101000	Beef steak, NS as to cooking method, NS as to fat eaten	beef steak	0	0	0	0	0	0	0	0	0	0	0	0	0	0	0	0	0	3.49	3.49	3.49	0	0	0	0	0	0	0	0	0	0	0	0	0	0	0.35	0	0
21101110	Beef steak, broiled or baked, NS as to fat eaten	grilled beef	0	0	0	0	0	0	0	0	0	0	0	0	0	0	0	0	0	3.49	3.49	3.49	0	0	0	0	0	0	0	0	0	0	0	0	0	0	0.35	0	0
21102110	Beef steak, fried, NS as to fat eaten	beef stir fry	0	0	0	0	0	0	0	0	0	0	0	0	0	0	0	0	0	3.49	3.49	3.49	0	0	0	0	0	0	0	0	0	0	0	0	0	0	0.35	0	0
21410000	Beef, stew meat, cooked, NS as to fat eaten	stewed beef	0	0	0	0	0	0	0	0	0	0	0	0	0	0	0	0	0	3.34	3.34	3.34	0	0	0	0	0	0	0	0	0	0	0	0	0	0	4.4	0	0
22000200	Pork, NS as to cut, fried, NS as to fat eaten	stir-fried pork	0	0	0	0	0	0	0	0	0	0	0	0	0	0	0	0	0	3.44	3.44	3.44	0	0	0	0	0	0	0	0	0	0	0	0	0	0	1.45	0	0
22000300	Pork, NS as to cut, breaded or floured, fried, NS as to fat eaten	fried pork	0	0	0	0	0	0	0	0	0	0	0	0	0	0	1.12	0	1.12	2.49	2.28	2.28	0	0	0	0	0	0.21	0	0	0	0	0	0	0	5.81	1.34	0.32	0
22101500	Pork chop, stewed, NS as to fat eaten	stewed pork	0	0	0	0	0	0	0	0	0	0	0	0	0	0	0	0	0	3.44	3.44	3.44	0	0	0	0	0	0	0	0	0	0	0	0	0	0	1.45	0	0
22101500	Pork chop, stewed, NS as to fat eaten	Simmered pork	0	0	0	0	0	0	0	0	0	0	0	0	0	0	0	0	0	3.44	3.44	3.44	0	0	0	0	0	0	0	0	0	0	0	0	0	0	1.45	0	0
22101500	Pork chop, stewed, NS as to fat eaten	pork soup	0	0	0	0	0	0	0	0	0	0	0	0	0	0	0	0	0	3.44	3.44	3.44	0	0	0	0	0	0	0	0	0	0	0	0	0	0	1.45	0	0
25110140	Beef liver, fried	pork liver	0	0	0	0	0	0	0	0	0	0	0	0	0	0	0	0	0	3.5	3.5	0	0	3.5	0	0	0	0	0	0	0	0	0	0	0	0	0	0	0
24198683	Chicken fillet, grilled	Grilled chicken	0	0	0	0	0	0	0	0	0	0	0	0	0	0	0.18	0	0.18	2.78	2.78	0	0	0	2.78	0	0	0	0	0	0	0	0	0	0	2.96	0	0	0
24124201	Chicken breast, sauteed, skin not eaten	fried chicken	0	0	0	0	0	0	0	0	0	0	0	0	0	0	0	0	0	3.43	3.43	0	0	0	3.43	0	0	0	0	0	0	0	0	0	0	2	0	0	0
24123120	Chicken breast, stewed, skin not eaten	Simmered chicken	0	0	0	0	0	0	0	0	0	0	0	0	0	0	0	0	0	3.5	3.5	0	0	0	3.5	0	0	0	0	0	0	0	0	0	0	0	0	0	0
24107070	Chicken, NS as to part, fried, coated, skin / coating eaten	Deep fried chicken	0	0	0	0	0	0	0	0	0	0	0	0	0	0	0.5	0	0.5	2.65	2.63	0	0	0	2.63	0	0	0.02	0	0	0	0.01	0.01	0	0	4.89	3.37	0	0
25110420	Chicken liver, braised	chicken liver	0	0	0	0	0	0	0	0	0	0	0	0	0	0	0	0	0	3.5	3.5	0	0	3.5	0	0	0	0	0	0	0	0	0	0	0	0	0	0	0
22311000	Ham, smoked or cured, cooked, NS as to fat eaten	Pork loin ham	0	0	0	0	0	0	0	0	0	0	0	0	0	0	0	0	0	3.53	3.53	0	3.53	0	0	0	0	0	0	0	0	0	0	0	0	0	0	0.25	0
25221400	Sausage, NFS	wiener sausage	0	0	0	0	0	0	0	0	0	0	0	0	0	0	0	0	0	2.83	2.83	0	2.83	0	0	0	0	0	0	0	0	0	0	0	0	0	19.81	0	0
22600100	Bacon, NS as to type of meat, cooked	bacon	0	0	0	0	0	0	0	0	0	0	0	0	0	0	0	0	0	2.52	2.52	0	2.52	0	0	0	0	0	0	0	0	0	0	0	0	0	28.45	0	0
22311500	Ham, smoked or cured, canned, NS as to fat eaten	Luncheon meat	0	0	0	0	0	0	0	0	0	0	0	0	0	0	0	0	0	3.53	3.53	0	3.53	0	0	0	0	0	0	0	0	0	0	0	0	0	0	0.24	0
11112210	Milk, low fat (1%)	low fat milk	0	0	0	0	0	0	0	0	0	0	0	0	0	0	0	0	0	0	0	0	0	0	0	0	0	0	0	0	0	0.41	0.41	0	0	0	0.34	0	0
11111000	Milk, whole	whole milk	0	0	0	0	0	0	0	0	0	0	0	0	0	0	0	0	0	0	0	0	0	0	0	0	0	0	0	0	0	0.41	0.41	0	0	0	2.59	0	0
31102000	Egg, whole, cooked, NS as to cooking method	egg	0	0	0	0	0	0	0	0	0	0	0	0	0	0	0	0	0	1.91	0	0	0	0	0	0	0	1.91	0	0	0	0	0	0	0	4.35	4.06	0	0
14010000	Cheese, NFS	Cheese	0	0	0	0	0	0	0	0	0	0	0	0	0	0	0	0	0	0	0	0	0	0	0	0	0	0	0	0	0	2.35	0	0	2.35	0	26.1	0	0
11411100	Yogurt, whole milk, plain	yogurt	0	0	0	0	0	0	0	0	0	0	0	0	0	0	0	0	0	0	0	0	0	0	0	0	0	0	0	0	0	0.41	0	0.41	0	0	2.64	0	0
26109170	Cod, dried, salted	Salt cod, salted mackerel, salted salmon	0	0	0	0	0	0	0	0	0	0	0	0	0	0	0	0	0	7.76	7.76	0	0	0	0	0	7.76	0	0	0	0	0	0	0	0	0	0	0	0
26100170	Fish, NS as to type, dried	dried fish	0	0	0	0	0	0	0	0	0	0	0	0	0	0	0	0	0	7.76	7.76	0	0	0	0	0	7.76	0	0	0	0	0	0	0	0	0	0	0	0
26155110	Tuna, canned, NS as to oil or water pack	Canned tuna	0	0	0	0	0	0	0	0	0	0	0	0	0	0	0	0	0	3.53	3.53	0	0	0	0	1.08	2.45	0	0	0	0	0	0	0	0	0	0	0	0
26137110	Salmon, cooked, NS as to cooking method	Salmon	0	0	0	0	0	0	0	0	0	0	0	0	0	0	0	0	0	3.33	3.33	0	0	0	0	3.33	0	0	0	0	0	0	0	0	0	3.77	0	0	0
26153100	Tuna, fresh, raw	Bonito	0	0	0	0	0	0	0	0	0	0	0	0	0	0	0	0	0	3.33	3.33	0	0	0	0	0	3.33	0	0	0	0	0	0	0	0	3.77	0	0	0
26153100	Tuna, fresh, raw	yellowtail	0	0	0	0	0	0	0	0	0	0	0	0	0	0	0	0	0	3.33	3.33	0	0	0	0	0	3.33	0	0	0	0	0	0	0	0	3.77	0	0	0
26109110	Cod, cooked, NS as to cooking method	cod	0	0	0	0	0	0	0	0	0	0	0	0	0	0	0	0	0	3.33	3.33	0	0	0	0	0	3.33	0	0	0	0	0	0	0	0	3.77	0	0	0
26133110	Porgy, cooked, NS as to cooking method	sea bream	0	0	0	0	0	0	0	0	0	0	0	0	0	0	0	0	0	3.33	3.33	0	0	0	0	0	3.33	0	0	0	0	0	0	0	0	3.77	0	0	0
26121180	Mackerel, canned	taste	0	0	0	0	0	0	0	0	0	0	0	0	0	0	0	0	0	3.53	3.53	0	0	0	0	3.53	0	0	0	0	0	0	0	0	0	0	0	0	0
26149110	Swordfish, cooked, NS as to cooking method	Pacific saury	0	0	0	0	0	0	0	0	0	0	0	0	0	0	0	0	0	3.33	3.33	0	0	0	0	3.33	0	0	0	0	0	0	0	0	0	3.77	0	0	0
26139170	Sardines, dried	dried and salted baby sardine	0	0	0	0	0	0	0	0	0	0	0	0	0	0	0	0	0	2.99	2.99	0	0	0	0	2.99	0	0	0	0	0	0	0	0	0	15.32	0	0	0
26211100	Roe, sturgeon	Cod roe, salmon roe, salmon roe	0	0	0	0	0	0	0	0	0	0	0	0	0	0	0	0	0	3.19	3.19	0	0	0	0	3.19	0	0	0	0	0	0	0	0	0	9.5	0	0	0
26113110	Eel, cooked, NS as to cooking method	eel	0	0	0	0	0	0	0	0	0	0	0	0	0	0	0.76	0	0.76	2.56	2.37	0	0	0	0	0	2.37	0.19	0	0	0	0	0	0	0	12.81	0.41	0	0
26213100	Squid, raw	squid	0	0	0	0	0	0	0	0	0	0	0	0	0	0	0	0	0	2.72	2.72	0	0	0	0	0	2.72	0	0	0	0	0	0	0	0	0	0	0	0
26205110	Octopus, cooked, NS as to cooking method	Octopus	0	0	0	0	0	0	0	0	0	0	0	0	0	0	0.7	0	0.7	2.63	2.43	0	0	0	0	0	2.43	0.2	0	0	0	0	0	0	0	9.03	0.98	0.2	0
26319110	Shrimp, cooked, NS as to cooking method	Shrimp	0	0	0	0	0	0	0	0	0	0	0	0	0	0	0.7	0	0.7	2.63	2.43	0	0	0	0	0	2.43	0.2	0	0	0	0	0	0	0	9.03	0.98	0.2	0
26303110	Clams, cooked, NS as to cooking method	clams	0	0	0	0	0	0	0	0	0	0	0	0	0	0	0	0	0	3.33	3.33	0	0	0	0	0	3.33	0	0	0	0	0	0	0	0	3.68	0	0	0
26321110	Snails, cooked, NS as to cooking method	pond snails	0	0	0	0	0	0	0	0	0	0	0	0	0	0	0	0	0	3.33	3.33	0	0	0	0	0	3.33	0	0	0	0	0	0	0	0	3.68	0	0	0
27250520	Seafood restructured	Chikuwa	0	0	0	0	0	0	0	0	0	0	0	0	0	0	0	0	0	1.32	1.22	0	0	0	0	0	1.22	0.1	0	0	0	0	0	0	0	0	0	1.43	0
27250050	Fish cake or patty, NS as to fish	Kamaboko	0	0	0	0	0.26	0	0	0	0	0.26	0.26	0	0	0	0.25	0	0.25	1.54	1.41	0	0	0	0	0	1.41	0.13	0	0	0	0.06	0.06	0	0	0	12.08	0	0
27250050	Fish cake or patty, NS as to fish	Satsuma-age	0	0	0	0	0.26	0	0	0	0	0.26	0.26	0	0	0	0.25	0	0.25	1.54	1.41	0	0	0	0	0	1.41	0.13	0	0	0	0.06	0.06	0	0	0	12.08	0	0
73102211	Carrots, fresh, cooked, no added fat	Carrot	0	0	0	0	0.69	0	0.69	0	0.69	0	0	0	0	0	0	0	0	0	0	0	0	0	0	0	0	0	0	0	0	0	0	0	0	0	0	0	0
72125100	Spinach, raw	Spinach	0	0	0	0	1.43	1.43	0	0	0	0	0	0	0	0	0	0	0	0	0	0	0	0	0	0	0	0	0	0	0	0	0	0	0	0	0	0	0
73201020	Pumpkin, cooked	pumpkin	0	0	0	0	0.41	0	0.41	0	0.41	0	0	0	0	0	0	0	0	0	0	0	0	0	0	0	0	0	0	0	0	0	0	0	0	1.77	0.96	0	0
75103000	Cabbage, green, raw	Cabbage	0	0	0	0	1.11	0	0	0	0	0	0	0	1.11	0	0	0	0	0	0	0	0	0	0	0	0	0	0	0	0	0	0	0	0	0	0	0	0
75227110	Daikon radish, cooked	Radish	0	0	0	0	0.69	0	0	0	0	0	0	0	0.69	0	0	0	0	0	0	0	0	0	0	0	0	0	0	0	0	0	0	0	0	1.64	0.89	0	0
75512010	Radishes, pickled, Hawaiian style	Pickled radish	0	0	0	0	0.66	0	0	0	0	0	0	0	0.66	0	0	0	0	0	0	0	0	0	0	0	0	0	0	0	0	0	0	0	0	0	0	1.16	0
75502500	Cabbage, fresh, pickled, Japanese style	pickled green leaves	0	0	0	0	0.92	0	0	0	0	0	0	0	0.92	0	0	0	0	0	0	0	0	0	0	0	0	0	0	0	0	0	0	0	0	0	0	1.16	0
63100110	Fruit, pickled	Pickled Umeboshi plum	0.57	0	0.57	0	0	0	0	0	0	0	0	0	0	0	0	0	0	0	0	0	0	0	0	0	0	0	0	0	0	0	0	0	0	0	0	1.17	0
75502500	Cabbage, fresh, pickled, Japanese style	Pickled Chinese cabbage	0	0	0	0	0.92	0	0	0	0	0	0	0	0.92	0	0	0	0	0	0	0	0	0	0	0	0	0	0	0	0	0	0	0	0	0	0	1.16	0
75503010	Pickles, dill	pickled cucumber	0	0	0	0	0.65	0	0	0	0	0	0	0	0.65	0	0	0	0	0	0	0	0	0	0	0	0	0	0	0	0	0	0	0	0	0	0	0	0
75503080	Eggplant, pickled	pickled eggplant	0	0	0	0	1.04	0	0	0	0	0	0	0	1.04	0	0	0	0	0	0	0	0	0	0	0	0	0	0	0	0	0	0	0	0	0	0	1.16	0
75534030	Turnip, pickled	pickled turnip	0	0	0	0	0.64	0	0	0	0	0	0	0	0.64	0	0	0	0	0	0	0	0	0	0	0	0	0	0	0	0	0	0	0	0	0	0	1.16	0
75226020	Peppers, green, cooked	green pepper	0	0	0	0	0.74	0	0	0	0	0	0	0	0.74	0	0	0	0	0	0	0	0	0	0	0	0	0	0	0	0	0	0	0	0	1.71	0.93	0	0
74101000	Tomatoes, raw	tomato	0	0	0	0	0.59	0	0.59	0.59	0	0	0	0	0	0	0	0	0	0	0	0	0	0	0	0	0	0	0	0	0	0	0	0	0	0	0	0	0
75117010	Onions, green, raw	welsh onion	0	0	0	0	1	0	0	0	0	0	0	0	1	0	0	0	0	0	0	0	0	0	0	0	0	0	0	0	0	0	0	0	0	0	0	0	0
75221061	Onions, green, cooked	Green onion, Wake onion	0	0	0	0	0.45	0	0	0	0	0	0	0	0.45	0	0	0	0	0	0	0	0	0	0	0	0	0	0	0	0	0	0	0	0	1.99	1.09	0	0
75109500	Chives, raw	chives	0	0	0	0	2	0	0	0	0	0	0	0	2	0	0	0	0	0	0	0	0	0	0	0	0	0	0	0	0	0	0	0	0	0	0	0	0
72133201	Sweet potato, squash, pumpkin, chrysanthemum, or bean leaves, cooked	garland chrysanthemum	0	0	0	0	1.54	1.54	0	0	0	0	0	0	0	0	0	0	0	0	0	0	0	0	0	0	0	0	0	0	0	0	0	0	0	1.64	0.89	0	0
72122211	Mustard greens, fresh, cooked, no added fat	Komatsuna	0	0	0	0	0.71	0.71	0	0	0	0	0	0	0	0	0	0	0	0	0	0	0	0	0	0	0	0	0	0	0	0	0	0	0	0	0	0	0
72201211	Broccoli, fresh, cooked, no added fat	Broccoli	0	0	0	0	0.65	0.65	0	0	0	0	0	0	0	0	0	0	0	0	0	0	0	0	0	0	0	0	0	0	0	0	0	0	0	0	0	0	0
75221011	Onions, cooked, no added fat	onion	0	0	0	0	0.48	0	0	0	0	0	0	0	0.48	0	0	0	0	0	0	0	0	0	0	0	0	0	0	0	0	0	0	0	0	0	0	0	0
75111000	Cucumber, raw	Cucumber	0	0	0	0	0.83	0	0	0	0	0	0	0	0.83	0	0	0	0	0	0	0	0	0	0	0	0	0	0	0	0	0	0	0	0	0	0	0	0
75217010	Eggplant, cooked, no added fat	eggplant	0	0	0	0	1.05	0	0	0	0	0	0	0	1.05	0	0	0	0	0	0	0	0	0	0	0	0	0	0	0	0	0	0	0	0	0	0	0	0
75210010	Cabbage, Chinese, cooked, no added fat	Chinese cabbage	0	0	0	0	0.59	0.59	0	0	0	0	0	0	0	0	0	0	0	0	0	0	0	0	0	0	0	0	0	0	0	0	0	0	0	0	0	0	0
75209501	Burdock, cooked	Burdock	0	0	0	0	0.8	0	0	0	0	0.8	0	0.8	0	0	0	0	0	0	0	0	0	0	0	0	0	0	0	0	0	0	0	0	0	1.77	0.96	0	0
75207021	Bean sprouts, cooked	bean sprouts	0	0	0	0	0.8	0	0	0	0	0	0	0	0.8	0	0	0	0	0	0	0	0	0	0	0	0	0	0	0	0	0	0	0	0	4.36	2.38	0	0
75205021	Green beans, fresh, cooked, no added fat	green beans	0	0	0	0	0.8	0	0	0	0	0	0	0	0.8	0	0	0	0	0	0	0	0	0	0	0	0	0	0	0	0	0	0	0	0	0	0	0	0
75113000	Lettuce, raw	lettuce	0	0	0	0	0.91	0	0	0	0	0	0	0	0.91	0	0	0	0	0	0	0	0	0	0	0	0	0	0	0	0	0	0	0	0	0	0	0	0
75202011	Asparagus, fresh, cooked, no added fat	green asparagus	0	0	0	0	0.56	0	0	0	0	0	0	0	0.56	0	0	0	0	0	0	0	0	0	0	0	0	0	0	0	0	0	0	0	0	0	0	0	0
75217400	Garlic, cooked	garlic	0	0	0	0	0.74	0	0	0	0	0	0	0	0.74	0	0	0	0	0	0	0	0	0	0	0	0	0	0	0	0	0	0	0	0	0	0	0	0
75210010	Cabbage, Chinese, cooked, no added fat	Chingensai	0	0	0	0	0.59	0.59	0	0	0	0	0	0	0	0	0	0	0	0	0	0	0	0	0	0	0	0	0	0	0	0	0	0	0	0	0	0	0
72122211	Mustard greens, fresh, cooked, no added fat	Mustard	0	0	0	0	0.71	0.71	0	0	0	0	0	0	0	0	0	0	0	0	0	0	0	0	0	0	0	0	0	0	0	0	0	0	0	0	0	0	0
75208310	Bitter melon, cooked	bitter melon	0	0	0	0	0.8	0	0	0	0	0	0	0	0.8	0	0	0	0	0	0	0	0	0	0	0	0	0	0	0	0	0	0	0	0	1.64	0.89	0	0
72104220	Chard, cooked	Swiss chard	0	0	0	0	0.67	0.67	0	0	0	0	0	0	0	0	0	0	0	0	0	0	0	0	0	0	0	0	0	0	0	0	0	0	0	1.77	0.97	0	0
75220011	Okra, fresh, cooked, no added fat	Loofah	0	0	0	0	0.63	0	0	0	0	0	0	0	0.63	0	0	0	0	0	0	0	0	0	0	0	0	0	0	0	0	0	0	0	0	0	0	0	0
		Wormwood	0	0	0	0	0	0	0	0	0	0	0	0	0	0	0	0	0	0	0	0	0	0	0	0	0	0	0	0	0	0	0	0	0	0	0	0	0
63133010	Papaya, raw	papaya	0.71	0	0.71	0	0	0	0	0	0	0	0	0	0	0	0	0	0	0	0	0	0	0	0	0	0	0	0	0	0	0	0	0	0	0	0	0	0
61100600	Clementine, raw	mandarin orange	0.48	0.48	0	0	0	0	0	0	0	0	0	0	0	0	0	0	0	0	0	0	0	0	0	0	0	0	0	0	0	0	0	0	0	0	0	0	0
61119010	Orange, raw	citrus	0.54	0.54	0	0	0	0	0	0	0	0	0	0	0	0	0	0	0	0	0	0	0	0	0	0	0	0	0	0	0	0	0	0	0	0	0	0	0
63101000	Apple, raw	apple	0.91	0	0.91	0	0	0	0	0	0	0	0	0	0	0	0	0	0	0	0	0	0	0	0	0	0	0	0	0	0	0	0	0	0	0	0	0	0
63139010	Persimmon, raw	persimmon	0.61	0	0.61	0	0	0	0	0	0	0	0	0	0	0	0	0	0	0	0	0	0	0	0	0	0	0	0	0	0	0	0	0	0	0	0	0	0
63223020	Strawberries, raw	strawberry	0.69	0.69	0	0	0	0	0	0	0	0	0	0	0	0	0	0	0	0	0	0	0	0	0	0	0	0	0	0	0	0	0	0	0	0	0	0	0
63123000	Grapes, raw	Grape	0.67	0	0.67	0	0	0	0	0	0	0	0	0	0	0	0	0	0	0	0	0	0	0	0	0	0	0	0	0	0	0	0	0	0	0	0	0	0
63109010	Cantaloupe, raw	melon	0.59	0.59	0	0	0	0	0	0	0	0	0	0	0	0	0	0	0	0	0	0	0	0	0	0	0	0	0	0	0	0	0	0	0	0	0	0	0
63149010	Watermelon, raw	Watermelon	0.67	0.67	0	0	0	0	0	0	0	0	0	0	0	0	0	0	0	0	0	0	0	0	0	0	0	0	0	0	0	0	0	0	0	0	0	0	0
63135010	Peach, raw	Peaches	0.65	0	0.65	0	0	0	0	0	0	0	0	0	0	0	0	0	0	0	0	0	0	0	0	0	0	0	0	0	0	0	0	0	0	0	0	0	0
63137050	Pear, Asian, raw	none	0.61	0	0.61	0	0	0	0	0	0	0	0	0	0	0	0	0	0	0	0	0	0	0	0	0	0	0	0	0	0	0	0	0	0	0	0	0	0
63126500	Kiwi fruit, raw	kiwi	0.57	0.57	0	0	0	0	0	0	0	0	0	0	0	0	0	0	0	0	0	0	0	0	0	0	0	0	0	0	0	0	0	0	0	0	0	0	0
63141010	Pineapple, raw	Pineapple	0.61	0	0.61	0	0	0	0	0	0	0	0	0	0	0	0	0	0	0	0	0	0	0	0	0	0	0	0	0	0	0	0	0	0	0	0	0	0
63107010	Banana, raw	Banana	0.67	0	0.67	0	0	0	0	0	0	0	0	0	0	0	0	0	0	0	0	0	0	0	0	0	0	0	0	0	0	0	0	0	0	0	0	0	0
63129010	Mango, raw	mango	0.61	0	0.61	0	0	0	0	0	0	0	0	0	0	0	0	0	0	0	0	0	0	0	0	0	0	0	0	0	0	0	0	0	0	0	0	0	0
51000100	Bread, NS as to major flour	Bread	0	0	0	0	0	0	0	0	0	0	0	0	0	0	3.39	0	3.39	0	0	0	0	0	0	0	0	0	0	0	0	0	0	0	0	2.37	0	0.9	0
56113000	Noodles, whole grain, cooked	Udon	0	0	0	0	0	0	0	0	0	0	0	0	0	0	1.4	1.4	0	0	0	0	0	0	0	0	0	0	0	0	0	0	0	0	0	0	0	0	0
56113000	Noodles, whole grain, cooked	Soba	0	0	0	0	0	0	0	0	0	0	0	0	0	0	1.4	1.4	0	0	0	0	0	0	0	0	0	0	0	0	0	0	0	0	0	0	0	0	0
56113000	Noodles, whole grain, cooked	Okinawa soba	0	0	0	0	0	0	0	0	0	0	0	0	0	0	1.4	1.4	0	0	0	0	0	0	0	0	0	0	0	0	0	0	0	0	0	0	0	0	0
58407030	Soup, mostly noodles	Ramen	0	0	0	0	0	0	0	0	0	0	0	0	0	0	0.44	0	0.44	0	0	0	0	0	0	0	0	0	0	0	0	0	0	0	0	0	2.68	0	0
56130000	Pasta, cooked	spaghetti macaroni	0	0	0	0	0	0	0	0	0	0	0	0	0	0	1.4	0	1.4	0	0	0	0	0	0	0	0	0	0	0	0	0	0	0	0	0	0	0	0
56113000	Noodles, whole grain, cooked	Somen and hiyamugi noodles	0	0	0	0	0	0	0	0	0	0	0	0	0	0	1.4	0	1.4	0	0	0	0	0	0	0	0	0	0	0	0	0	0	0	0	0	0	0	0
54318500	Rice cake	rice cake	0	0	0	0	0	0	0	0	0	0	0	0	0	0	3.46	3.46	0	0	0	0	0	0	0	0	0	0	0	0	0	0	0	0	0	1.5	0	0	0
55701000	Cake made with glutinous rice	Japanese sweets	0	0	0	0	0	0	0	0	0	0	0	0	0	0	1.72	0	1.72	0	0	0	0	0	0	0	0	0	0	0	0	0	0	0	0	0	6.06	7.19	0
53100100	Cake or cupcake, NS as to type	cake	0	0	0	0	0	0	0	0	0	0	0	0	0	0	0.84	0	0.84	0.1	0	0	0	0	0	0	0	0.1	0	0	0	0.03	0.03	0	0	9.5	10.43	9.27	0
52101000	Biscuit, NFS	biscuits	0	0	0	0	0	0	0	0	0	0	0	0	0	0	3.41	0	3.41	0	0	0	0	0	0	0	0	0	0	0	0	0.09	0.09	0	0	0	17.62	0.42	0
91705010	Milk chocolate candy, plain	chocolate	0	0	0	0	0	0	0	0	0	0	0	0	0	0	0	0	0	0	0	0	0	0	0	0	0	0	0	0	0	0.16	0.16	0	0	0	28.29	10.46	0
13110000	Ice cream, NFS	ice cream	0	0	0	0	0	0	0	0	0	0	0	0	0	0	0	0	0	0	0	0	0	0	0	0	0	0	0	0	0	0.22	0.22	0	0	0.15	10.51	4.57	0
71200010	Potato chips, NFS	Snacks (potato chips)	0	0	0	0	1.75	0	0	0	0	1.75	1.75	0	0	0	0	0	0	0	0	0	0	0	0	0	0	0	0	0	0	0	0	0	0	33.98	0	0	0
54319000	Crackers, rice	Senbei rice clacker	0	0	0	0	0	0	0	0	0	0	0	0	0	0	5.94	0	5.94	0	0	0	0	0	0	0	0	0	0	0	0	0	0	0	0	4	0	0	0
43103000	Sesame seeds	Sesame	0	0	0	0	0	0	0	0	0	0	0	0	0	0	0	0	0	7.05	0	0	0	0	0	0	0	0	0	7.05	0	0	0	0	0	42.66	0	0	0
42111000	Peanuts, NFS	peanuts	0	0	0	0	0	0	0	0	0	0	0	0	0	0	0	0	0	7.05	0	0	0	0	0	0	0	0	0	7.05	0	0	0	0	0	31.11	0	0	0
41420010	Soybean curd	Tofu	0	0	0	0	0	0	0	0	0	0	0	0	0	0	0	0	0	1.6	0	0	0	0	0	0	0	0	1.6	0	0	0	0	0	0	0	0	0	0
41420010	Soybean curd	Simmered tofu	0	0	0	0	0	0	0	0	0	0	0	0	0	0	0	0	0	1.6	0	0	0	0	0	0	0	0	1.6	0	0	0	0	0	0	0	0	0	0
41420010	Soybean curd	Yushi tofu	0	0	0	0	0	0	0	0	0	0	0	0	0	0	0	0	0	1.6	0	0	0	0	0	0	0	0	1.6	0	0	0	0	0	0	0	0	0	0
41420010	Soybean curd	Koya-tofu freeze dried tofu	0	0	0	0	0	0	0	0	0	0	0	0	0	0	0	0	0	1.6	0	0	0	0	0	0	0	0	1.6	0	0	0	0	0	0	0	0	0	0
41421010	Soybean curd, deep fried	Namaage / Deep fried tofu	0	0	0	0	0	0	0	0	0	0	0	0	0	0	0	0	0	1.5	0	0	0	0	0	0	0	0	1.5	0	0	0	0	0	0	16.22	0	0	0
41421010	Soybean curd, deep fried	Aburaage/deep fried tofu	0	0	0	0	0	0	0	0	0	0	0	0	0	0	0	0	0	1.5	0	0	0	0	0	0	0	0	1.5	0	0	0	0	0	0	16.22	0	0	0
41420200	Natto	natto	0	0	0	0	0	0	0	0	0	0	0	0	0	0	0	0	0	3.53	0	0	0	0	0	0	0	0	3.53	0	0	0	0	0	0	1.72	0	0	0
73401000	Sweet potato, NFS	sweet potato	0	0	0	0	0.5	0	0.5	0	0.5	0	0	0	0	0	0	0	0	0	0	0	0	0	0	0	0	0	0	0	0	0	0	0	0	0	0	0	0
71000100	Potato, NFS	potatoes	0	0	0	0	0.65	0	0	0	0	0.65	0.65	0	0	0	0	0	0	0	0	0	0	0	0	0	0	0	0	0	0	0	0	0	0	0	0	0	0
71962040	Taro, cooked	Satoimo	0	0	0	0	0.77	0	0	0	0	0.77	0	0.77	0	0	0	0	0	0	0	0	0	0	0	0	0	0	0	0	0	0	0	0	0	1.77	0.97	0	0
73401000	Sweet potato, NFS	Yamaimo and Chinese yam	0	0	0	0	0.5	0	0.5	0	0.5	0	0	0	0	0	0	0	0	0	0	0	0	0	0	0	0	0	0	0	0	0	0	0	0	0	0	0	0
71962040	Taro, cooked	Konjac	0	0	0	0	0.77	0	0	0	0	0.77	0	0.77	0	0	0	0	0	0	0	0	0	0	0	0	0	0	0	0	0	0	0	0	0	1.77	0.97	0	0
75219020	Mushrooms, NS as to form, cooked	Shiitake mushrooms	0	0	0	0	0.65	0	0	0	0	0	0	0	0.65	0	0	0	0	0	0	0	0	0	0	0	0	0	0	0	0	0	0	0	0	0	0	0	0
75219020	Mushrooms, NS as to form, cooked	enoki mushrooms	0	0	0	0	0.65	0	0	0	0	0	0	0	0.65	0	0	0	0	0	0	0	0	0	0	0	0	0	0	0	0	0	0	0	0	0	0	0	0
75219020	Mushrooms, NS as to form, cooked	shimeji mushrooms	0	0	0	0	0.65	0	0	0	0	0	0	0	0.65	0	0	0	0	0	0	0	0	0	0	0	0	0	0	0	0	0	0	0	0	0	0	0	0
75232110	Seaweed, cooked, no added fat	wakame seaweed	0	0	0	0	1.25	0	0	0	0	0	0	0	1.25	0	0	0	0	0	0	0	0	0	0	0	0	0	0	0	0	0	0	0	0	0	0	0	0
75232110	Seaweed, cooked, no added fat	Hijiki seaweed	0	0	0	0	1.25	0	0	0	0	0	0	0	1.25	0	0	0	0	0	0	0	0	0	0	0	0	0	0	0	0	0	0	0	0	0	0	0	0
75232000	Seaweed, dried	Nori seaweed	0	0	0	0	10	0	0	0	0	0	0	0	10	0	0	0	0	0	0	0	0	0	0	0	0	0	0	0	0	0	0	0	0	0	0	0	0
81100500	Butter, NFS	Butter	0	0	0	0	0	0	0	0	0	0	0	0	0	0	0	0	0	0	0	0	0	0	0	0	0	0	0	0	0	0	0	0	0	0	81.11	0	0
81102000	Margarine, NFS	Margarine	0	0	0	0	0	0	0	0	0	0	0	0	0	0	0	0	0	0	0	0	0	0	0	0	0	0	0	0	0	0	0	0	0	32.52	32.52	0	0
91402000	Jam, preserve, all flavors	jam	0.28	0.15	0.13	0	0	0	0	0	0	0	0	0	0	0	0	0	0	0	0	0	0	0	0	0	0	0	0	0	0	0	0	0	0	0	0	11.55	0
91302010	Honey	honey	0	0	0	0	0	0	0	0	0	0	0	0	0	0	0	0	0	0	0	0	0	0	0	0	0	0	0	0	0	0	0	0	0	0	0	19.55	0
83112990	Sesame dressing	Dressing	0	0	0	0	0	0	0	0	0	0	0	0	0	0	0	0	0	0	0	0	0	0	0	0	0	0	0	0	0	0	0	0	0	45.2	0	1.98	0
83107000	Mayonnaise, regular	Mayonnaise	0	0	0	0	0	0	0	0	0	0	0	0	0	0	0	0	0	0.15	0	0	0	0	0	0	0	0.15	0	0	0	0	0	0	0	73	0.43	0	0
41420450	Worcestershire sauce	worcester sauce	0	0	0	0	0	0	0	0	0	0	0	0	0	0	0	0	0	0	0	0	0	0	0	0	0	0	0	0	0	0	0	0	0	0	0	2.39	0
74401010	Ketchup	Tomato ketchup	0	0	0	0	0.58	0	0.58	0.58	0	0	0	0	0	0	0	0	0	0	0	0	0	0	0	0	0	0	0	0	0	0	0	0	0	0	0	4.47	0
75506010	Mustard	Mustard	0	0	0	0	0	0	0	0	0	0	0	0	0	0	0	0	0	0	0	0	0	0	0	0	0	0	0	0	0	0	0	0	0	0	0	0	0
75534550	Wasabi paste	wasabi	0	0	0	0	0.29	0	0	0	0	0	0	0	0.29	0	0	0	0	0	0	0	0	0	0	0	0	0	0	0	0	0	0	0	0	10	0	1.9	0
75122200	Pepper, sweet, red, raw	red pepper	0	0	0	0	0.83	0	0.83	0	0.83	0	0	0	0	0	0	0	0	0	0	0	0	0	0	0	0	0	0	0	0	0	0	0	0	0	0	0	0
75503085	Ginger root, pickled	ginger	0	0	0	0	0.26	0	0	0	0	0	0	0	0.26	0	0	0	0	0	0	0	0	0	0	0	0	0	0	0	0	0	0	0	0	0	0	0	0
95230010	Nutritional powder mix, protein, soy based, NFS	Kinako/Soy bean powder	0	0	0	0	0	0	0	0	0	0	0	0	0	0	0	0	0	4.8	0	0	0	0	0	0	0	0	4.8	0	0	0	0	0	0	2.25	0	5.08	0
92303010	Tea, hot, leaf, green	green tea	0	0	0	0	0	0	0	0	0	0	0	0	0	0	0	0	0	0	0	0	0	0	0	0	0	0	0	0	0	0	0	0	0	0	0	0	0
92309500	Tea, iced, bottled, green	Japanese tea (cans, PET bottles)	0	0	0	0	0	0	0	0	0	0	0	0	0	0	0	0	0	0	0	0	0	0	0	0	0	0	0	0	0	0	0	0	0	0	0	1.27	0
92304100	Tea, hot, leaf, oolong	oolong tea	0	0	0	0	0	0	0	0	0	0	0	0	0	0	0	0	0	0	0	0	0	0	0	0	0	0	0	0	0	0	0	0	0	0	0	0	0
92309000	Tea, iced, bottled, black	Oolong tea (can, plastic bottle)	0	0	0	0	0	0	0	0	0	0	0	0	0	0	0	0	0	0	0	0	0	0	0	0	0	0	0	0	0	0	0	0	0	0	0	2.26	0
92302000	Tea, hot, leaf, black	black tea	0	0	0	0	0	0	0	0	0	0	0	0	0	0	0	0	0	0	0	0	0	0	0	0	0	0	0	0	0	0	0	0	0	0	0	0	0
92309000	Tea, iced, bottled, black	Black tea (can, plastic bottle)	0	0	0	0	0	0	0	0	0	0	0	0	0	0	0	0	0	0	0	0	0	0	0	0	0	0	0	0	0	0	0	0	0	0	0	2.26	0
92101000	Coffee, brewed	coffee	0	0	0	0	0	0	0	0	0	0	0	0	0	0	0	0	0	0	0	0	0	0	0	0	0	0	0	0	0	0	0	0	0	0	0	0	0
92103000	Coffee, instant, reconstituted	coffee (instant)	0	0	0	0	0	0	0	0	0	0	0	0	0	0	0	0	0	0	0	0	0	0	0	0	0	0	0	0	0	0	0	0	0	0	0	0	0
92171000	Coffee, bottled/canned	canned coffee	0	0	0	0	0	0	0	0	0	0	0	0	0	0	0	0	0	0	0	0	0	0	0	0	0	0	0	0	0	0.25	0.25	0	0	0	0.79	1.78	0
74301100	Tomato juice, 100%	tomato juice	0	0	0	0	0.41	0	0.41	0.41	0	0	0	0	0	0	0	0	0	0	0	0	0	0	0	0	0	0	0	0	0	0	0	0	0	0	0	0	0
75132000	Mixed vegetable juice	Vegetable juice	0	0	0	0	0.41	0	0	0	0	0	0	0	0.41	0	0	0	0	0	0	0	0	0	0	0	0	0	0	0	0	0	0	0	0	0	0	0	0
61210000	Orange juice, 100%, NFS	orange juice	0.4	0	0	0.4	0	0	0	0	0	0	0	0	0	0	0	0	0	0	0	0	0	0	0	0	0	0	0	0	0	0	0	0	0	0	0	0	0
64104010	Apple juice, 100%	apple juice	0.4	0	0	0.4	0	0	0	0	0	0	0	0	0	0	0	0	0	0	0	0	0	0	0	0	0	0	0	0	0	0	0	0	0	0	0	0	0
61201020	Grapefruit juice, 100%, NS as to form	100% grapefruit juice	0.4	0	0	0.4	0	0	0	0	0	0	0	0	0	0	0	0	0	0	0	0	0	0	0	0	0	0	0	0	0	0	0	0	0	0	0	0	0
92510610	Fruit juice drink	Fruit drinks (not 100%)	0	0	0	0	0	0	0	0	0	0	0	0	0	0	0	0	0	0	0	0	0	0	0	0	0	0	0	0	0	0	0	0	0	0	0	0.6	0
92400000	Soft drink, NFS	Carbonated drink	0	0	0	0	0	0	0	0	0	0	0	0	0	0	0	0	0	0	0	0	0	0	0	0	0	0	0	0	0	0	0	0	0	0	0	2.37	0
11320000	Soy milk	soy milk	0	0	0	0	0	0	0	0	0	0	0	0	0	0	0	0	0	0	0	0	0	0	0	0	0	0	0	0	0	0.41	0.41	0	0	0.86	0	0.77	0
11115400	Kefir, NS as to fat content	Yakult	0	0	0	0	0	0	0	0	0	0	0	0	0	0	0	0	0	0	0	0	0	0	0	0	0	0	0	0	0	0.41	0.41	0	0	0	0.35	0	0
94000100	Water, tap	Tap water	0	0	0	0	0	0	0	0	0	0	0	0	0	0	0	0	0	0	0	0	0	0	0	0	0	0	0	0	0	0	0	0	0	0	0	0	0
94100100	Water, bottled, unsweetened	commercial water	0	0	0	0	0	0	0	0	0	0	0	0	0	0	0	0	0	0	0	0	0	0	0	0	0	0	0	0	0	0	0	0	0	0	0	0	0
91101000	Sugar, NFS	tea sugar	0	0	0	0	0	0	0	0	0	0	0	0	0	0	0	0	0	0	0	0	0	0	0	0	0	0	0	0	0	0	0	0	0	0	0	1.83	0
11100000	Milk, NFS	black tea milk	0	0	0	0	0	0	0	0	0	0	0	0	0	0	0	0	0	0	0	0	0	0	0	0	0	0	0	0	0	0.41	0.41	0	0	0	1.38	0	0
92130020	Coffee, pre-sweetened with sugar	coffee sugar	0	0	0	0	0	0	0	0	0	0	0	0	0	0	0	0	0	0	0	0	0	0	0	0	0	0	0	0	0	0	0	0	0	0	0	1.83	0
11100000	Milk, NFS	coffee milk	0	0	0	0	0	0	0	0	0	0	0	0	0	0	0	0	0	0	0	0	0	0	0	0	0	0	0	0	0	0.41	0.41	0	0	0	1.38	0	0
82101000	Vegetable oil, NFS	Cooking oil (g/d)	0	0	0	0	0	0	0	0	0	0	0	0	0	0	0	0	0	0	0	0	0	0	0	0	0	0	0	0	0	0	0	0	0	100	0	0	0
		cooking salt	0	0	0	0	0	0	0	0	0	0	0	0	0	0	0	0	0	0	0	0	0	0	0	0	0	0	0	0	0	0	0	0	0	0	0	0	0
58400100	Noodle soup, NFS	noodle soup	0	0	0	0	0	0	0	0	0	0	0	0	0	0	0.44	0	0.44	0	0	0	0	0	0	0	0	0	0	0	0	0	0	0	0	0	2.68	0	0
82101000	Vegetable oil, NFS	Formulated oil	0	0	0	0	0	0	0	0	0	0	0	0	0	0	0	0	0	0	0	0	0	0	0	0	0	0	0	0	0	0	0	0	0	100	0	0	0
82106000	Safflower oil	safflower oil	0	0	0	0	0	0	0	0	0	0	0	0	0	0	0	0	0	0	0	0	0	0	0	0	0	0	0	0	0	0	0	0	0	100	0	0	0
82102000	Corn oil	corn oil	0	0	0	0	0	0	0	0	0	0	0	0	0	0	0	0	0	0	0	0	0	0	0	0	0	0	0	0	0	0	0	0	0	100	0	0	0
82108000	Soybean oil	soybean oil	0	0	0	0	0	0	0	0	0	0	0	0	0	0	0	0	0	0	0	0	0	0	0	0	0	0	0	0	0	0	0	0	0	100	0	0	0
82105500	Canola oil	Rapeseed oil, canola oil	0	0	0	0	0	0	0	0	0	0	0	0	0	0	0	0	0	0	0	0	0	0	0	0	0	0	0	0	0	0	0	0	0	100	0	0	0
82104000	Olive oil	olive oil	0	0	0	0	0	0	0	0	0	0	0	0	0	0	0	0	0	0	0	0	0	0	0	0	0	0	0	0	0	0	0	0	0	100	0	0	0
Spain
11111000	Milk, whole	Whole milk (1 cup, 200ml)	0	0	0	0	0	0	0	0	0	0	0	0	0	0	0	0	0	0	0	0	0	0	0	0	0	0	0	0	0	0.41	0.41	0	0	0	1.38	0	0
11112210	Milk, low fat (1%)	Semi-skimmed milk (1 cup, 200ml)	0	0	0	0	0	0	0	0	0	0	0	0	0	0	0	0	0	0	0	0	0	0	0	0	0	0	0	0	0	0.41	0.41	0	0	0	0.34	0	0
11113000	Milk, fat free (skim)	skimmed milk (1 cup, 200ml)	0	0	0	0	0	0	0	0	0	0	0	0	0	0	0	0	0	0	0	0	0	0	0	0	0	0	0	0	0	0.41	0.41	0	0	0	0	0	0
11220000	Milk, condensed, sweetened	Condensed milk (1 dessertspoon)	0	0	0	0	0	0	0	0	0	0	0	0	0	0	0	0	0	0	0	0	0	0	0	0	0	0	0	0	0	0.4	0.4	0	0	0	8.1	11.71	0
11210050	Milk, evaporated, NS as to fat content	Cream or evaporated milk (1/2 cup)	0	0	0	0	0	0	0	0	0	0	0	0	0	0	0	0	0	0	0	0	0	0	0	0	0	0	0	0	0	0.8	0.8	0	0	0	6.36	0	0
11541110	Milk shake, home recipe, chocolate	Milk shakes(1 glass, 200ml)	0	0	0	0	0	0	0	0	0	0	0	0	0	0	0	0	0	0	0	0	0	0	0	0	0	0	0	0	0	0.33	0.33	0	0	0	5.35	1.97	0
11411100	Yogurt, whole milk, plain	Whole yogurt(1, 125gr)	0	0	0	0	0	0	0	0	0	0	0	0	0	0	0	0	0	0	0	0	0	0	0	0	0	0	0	0	0	0.41	0	0.41	0	0	2.64	0	0
11411300	Yogurt, nonfat milk, plain	Skimmed yogurt (125gr)	0	0	0	0	0	0	0	0	0	0	0	0	0	0	0	0	0	0	0	0	0	0	0	0	0	0	0	0	0	0.41	0	0.41	0	0	0	0	0
14203010	Cheese, cottage, dry curd	Petit suite (125gr)	0	0	0	0	0	0	0	0	0	0	0	0	0	0	0	0	0	0	0	0	0	0	0	0	0	0	0	0	0	0.28	0	0	0.28	0	0	0	0
14200100	Cheese, cottage, NFS	Cottage cheese or curd(1/2 cup)	0	0	0	0	0	0	0	0	0	0	0	0	0	0	0	0	0	0	0	0	0	0	0	0	0	0	0	0	0	0.34	0	0	0.34	0	1.79	0	0
14420100	Cheese spread, American or Cheddar cheese base	Portioned or creamy cheese (125gr portion)	0	0	0	0	0	0	0	0	0	0	0	0	0	0	0	0	0	0	0	0	0	0	0	0	0	0	0	0	0	1.76	0	0	1.76	0	18.58	0	0
14104100	Cheese, Cheddar	Other cheeses: cured, semi-cured (Manchego, Bola, Cheddar, Emmental) (50gr)	0	0	0	0	0	0	0	0	0	0	0	0	0	0	0	0	0	0	0	0	0	0	0	0	0	0	0	0	0	2.35	0	0	2.35	0	30.47	0	0
14104700	Cheese, goat	White or fresh cheese (Burgo, goat...) (50gr)	0	0	0	0	0	0	0	0	0	0	0	0	0	0	0	0	0	0	0	0	0	0	0	0	0	0	0	0	0	1.41	0	0	1.41	0	27.72	0	0
13210350	Flan	Homemade or commercial custard, flan, pudding	0	0	0	0	0	0	0	0	0	0	0	0	0	0	0	0	0	0.5	0	0	0	0	0	0	0	0.5	0	0	0	0.25	0.25	0	0	0	3.06	5.93	0
13110000	Ice cream, NFS	Ice cream (1 cone or tub)	0	0	0	0	0	0	0	0	0	0	0	0	0	0	0	0	0	0	0	0	0	0	0	0	0	0	0	0	0	0.22	0.22	0	0	0.15	10.51	4.57	0
31102000	Egg, whole, cooked, NS as to cooking method	eggs	0	0	0	0	0	0	0	0	0	0	0	0	0	0	0	0	0	1.91	0	0	0	0	0	0	0	1.91	0	0	0	0	0	0	0	4.35	4.06	0	0
24100010	Chicken, NS as to part and cooking method, skin eaten	. Chicken or turkey WITH skin (1 portion or piece)	0	0	0	0	0	0	0	0	0	0	0	0	0	0	0	0	0	3.44	3.44	0	0	0	3.44	0	0	0	0	0	0	0	0	0	0	0	2.4	0	0
24100020	Chicken, NS as to part and cooking method, skin not eaten	Chicken or turkey WITHOUT skin (1 portion or piece)	0	0	0	0	0	0	0	0	0	0	0	0	0	0	0	0	0	3.5	3.5	0	0	0	3.5	0	0	0	0	0	0	0	0	0	0	0	0	0	0
21401000	Beef, roast, roasted, NS as to fat eaten	Roast veal or beef (1 portion)	0	0	0	0	0	0	0	0	0	0	0	0	0	0	0	0	0	3.5	3.5	3.5	0	0	0	0	0	0	0	0	0	0	0	0	0	0	0	0	0
22000100	Pork, NS as to cut, cooked, NS as to fat eaten	Generic pork (1 portion)	0	0	0	0	0	0	0	0	0	0	0	0	0	0	0	0	0	3.44	3.44	3.44	0	0	0	0	0	0	0	0	0	0	0	0	0	0	1.45	0	0
23000100	Lamb, NS as to cut, cooked	Generic lamb (1 portion)	0	0	0	0	0	0	0	0	0	0	0	0	0	0	0	0	0	3.05	3.05	3.05	0	0	0	0	0	0	0	0	0	0	0	0	0	0	12.75	0	0
23310000	Rabbit, NS as to domestic or wild, cooked	Rabbit or hare (1 portion)	0	0	0	0	0	0	0	0	0	0	0	0	0	0	0	0	0	3.51	3.51	3.51	0	0	0	0	0	0	0	0	0	0	0	0	0	0	0	0	0
25110120	Beef liver, braised	Liver (beef, pork, chicken) (1 portion)	0	0	0	0	0	0	0	0	0	0	0	0	0	0	0	0	0	3.5	3.5	0	0	3.5	0	0	0	0	0	0	0	0	0	0	0	0	0	0	0
25150000	Brains, cooked	Other viscera (brains, heart, gizzards) (1 portion)	0	0	0	0	0	0	0	0	0	0	0	0	0	0	0	0	0	3.45	3.45	0	0	3.45	0	0	0	0	0	0	0	0	0	0	0	0	1.37	0	0
22311450	Ham, prosciutto	Serrano ham or shoulder (1 slice, 30gr)	0	0	0	0	0	0	0	0	0	0	0	0	0	0	0	0	0	3.53	3.53	0	3.53	0	0	0	0	0	0	0	0	0	0	0	0	0	0	0	0
22311000	Ham, smoked or cured, cooked, NS as to fat eaten	York ham, cooked ham ( 1 slice, 30gr)	0	0	0	0	0	0	0	0	0	0	0	0	0	0	0	0	0	3.53	3.53	0	3.53	0	0	0	0	0	0	0	0	0	0	0	0	0	0	0.25	0
25221400	Sausage, NFS	Processed meats (sausage, chorizo, black pudding, mortadella, sausages, botifarra and sobrasada) (50gr)	0	0	0	0	0	0	0	0	0	0	0	0	0	0	0	0	0	2.83	2.83	0	2.83	0	0	0	0	0	0	0	0	0	0	0	0	0	19.81	0	0
25112200	Liver paste or pate, chicken	28. Patés, foie-grás (25gr)	0	0	0	0	0	0	0	0	0	0	0	0	0	0	0.48	0	0.48	1.89	1.41	0	0	1.41	0	0	0	0.48	0	0	0	0	0	0	0	0	9.48	0	0
20000200	Ground meat, NFS	Hamburger (1, 50gr)	0	0	0	0	0	0	0	0	0	0	0	0	0	0	0	0	0	3.2	3.2	3.2	0	0	0	0	0	0	0	0	0	0	0	0	0	0	8.39	0	0
22600100	Bacon, NS as to type of meat, cooked	Bacon, bacon and pancetta (50gr)	0	0	0	0	0	0	0	0	0	0	0	0	0	0	0	0	0	2.52	2.52	0	2.52	0	0	0	0	0	0	0	0	0	0	0	0	0	28.45	0	0
26115123	Flounder, baked or broiled, no added fat	White fish (1 portion or piece)	0	0	0	0	0	0	0	0	0	0	0	0	0	0	0	0	0	3.46	3.46	0	0	0	0	0	3.46	0	0	0	0	0	0	0	0	0	0	0	0
26153122	Tuna, fresh, baked or broiled, no added fat	Blue fish (1 portion or piece)	0	0	0	0	0	0	0	0	0	0	0	0	0	0	0	0	0	3.46	3.46	0	0	0	0	0	3.46	0	0	0	0	0	0	0	0	0	0	0	0
26109170	Cod, dried, salted	Salted fish (cod, salted fish (1 serving, 60 gr)	0	0	0	0	0	0	0	0	0	0	0	0	0	0	0	0	0	7.76	7.76	0	0	0	0	0	7.76	0	0	0	0	0	0	0	0	0	0	0	0
26315180	Oysters, canned	Oysters, clams, mussels and the like (6 units)	0	0	0	0	0	0	0	0	0	0	0	0	0	0	0	0	0	3.53	3.53	0	0	0	0	0	3.53	0	0	0	0	0	0	0	0	0	0	0	0
26205160	Octopus, steamed	Squid, octopus, cuttlefish, cuttlefish (1 serving, 200gr)	0	0	0	0	0	0	0	0	0	0	0	0	0	0	0	0	0	3.5	3.5	0	0	0	0	0	3.5	0	0	0	0	0	0	0	0	0	0	0	0
26319123	Shrimp, baked or broiled, no added fat	rustaceans: prawns , prawns, langoustines and the like (4-5 pieces, 200gr)	0	0	0	0	0	0	0	0	0	0	0	0	0	0	0	0	0	3.46	3.46	0	0	0	0	0	3.46	0	0	0	0	0	0	0	0	0	0	0	0
26155190	Tuna, canned, water pack	Naturally canned fish and shellfish (sardines, anchovies, bonito, tuna) (1 small can or half a normal can, 50gr)	0	0	0	0	0	0	0	0	0	0	0	0	0	0	0	0	0	3.53	3.53	0	0	0	0	1.08	2.45	0	0	0	0	0	0	0	0	0	0	0	0
26155180	Tuna, canned, oil pack	Fish and shellfish in oil or Escabeche (sardines, anchovies, mussels, tuna, etc.) (1 small can or half a normal can, 50gr)	0	0	0	0	0	0	0	0	0	0	0	0	0	0	0	0	0	3.42	3.42	0	0	0	0	1.04	2.38	0	0	0	0	0	0	0	0	3	0	0	0
72125100	Spinach, raw	Swiss chard, spinach (serving, 200gr)	0	0	0	0	1.43	1.43	0	0	0	0	0	0	0	0	0	0	0	0	0	0	0	0	0	0	0	0	0	0	0	0	0	0	0	0	0	0	0
72201211	Broccoli, fresh, cooked, no added fat	Cabbage, cauliflower, broccoli (serving, 200gr)	0	0	0	0	0.65	0.65	0	0	0	0	0	0	0	0	0	0	0	0	0	0	0	0	0	0	0	0	0	0	0	0	0	0	0	0	0	0	0
72116000	Romaine lettuce, raw	Lettuce, endive and escarole (serving, 100gr)	0	0	0	0	1.05	1.05	0	0	0	0	0	0	0	0	0	0	0	0	0	0	0	0	0	0	0	0	0	0	0	0	0	0	0	0	0	0	0
74101000	Tomatoes, raw	Raw tomato (1, 150gr)	0	0	0	0	0.59	0	0.59	0.59	0	0	0	0	0	0	0	0	0	0	0	0	0	0	0	0	0	0	0	0	0	0	0	0	0	0	0	0	0
73102211	Carrots, fresh, cooked, no added fat	Carrot, pumpkin (garnish, 100gr)	0	0	0	0	0.69	0	0.69	0	0.69	0	0	0	0	0	0	0	0	0	0	0	0	0	0	0	0	0	0	0	0	0	0	0	0	0	0	0	0
75205021	Green beans, fresh, cooked, no added fat	Green beans (serving, 200gr)	0	0	0	0	0.8	0	0	0	0	0	0	0	0.8	0	0	0	0	0	0	0	0	0	0	0	0	0	0	0	0	0	0	0	0	0	0	0	0
75233011	Summer squash, yellow or green, fresh, cooked, no added fat	Eggplants, courgettes, cucumbers (medium 100gr)	0	0	0	0	0.56	0	0	0	0	0	0	0	0.56	0	0	0	0	0	0	0	0	0	0	0	0	0	0	0	0	0	0	0	0	0	0	0	0
75226020	Peppers, green, cooked	Peppers (medium unit, 150gr)	0	0	0	0	0.74	0	0	0	0	0	0	0	0.74	0	0	0	0	0	0	0	0	0	0	0	0	0	0	0	0	0	0	0	0	1.71	0.93	0	0
75202011	Asparagus, fresh, cooked, no added fat	Asparagus (serving, 200gr)	0	0	0	0	0.56	0	0	0	0	0	0	0	0.56	0	0	0	0	0	0	0	0	0	0	0	0	0	0	0	0	0	0	0	0	0	0	0	0
75604600	Gazpacho	Andalusian gazpacho (1 glass, 200ml)	0	0	0	0	0.58	0.01	0.4	0.4	0	0	0	0	0.17	0	0	0	0	0	0	0	0	0	0	0	0	0	0	0	0	0	0	0	0	2.21	0	0	0
75201011	Artichoke, fresh, cooked, no added fat	Other vegetables (artichokes, leeks, cardoons, celery) (serving, 200gr)	0	0	0	0	0.57	0	0	0	0	0	0	0	0.57	0	0	0	0	0	0	0	0	0	0	0	0	0	0	0	0	0	0	0	0	0	0	0	0
75221011	Onions, cooked, no added fat	Onion (half a unit) 50gr)	0	0	0	0	0.48	0	0	0	0	0	0	0	0.48	0	0	0	0	0	0	0	0	0	0	0	0	0	0	0	0	0	0	0	0	0	0	0	0
75217400	Garlic, cooked	Garlic (1 clove)	0	0	0	0	0.74	0	0	0	0	0	0	0	0.74	0	0	0	0	0	0	0	0	0	0	0	0	0	0	0	0	0	0	0	0	0	0	0	0
75119000	Parsley, raw	Parsley, thyme, bay leaf, oregano, etc. (A pinch)	0	0	0	0	0.83	0.83	0	0	0	0	0	0	0	0	0	0	0	0	0	0	0	0	0	0	0	0	0	0	0	0	0	0	0	0	0	0	0
71200010	Potato chips, NFS	Commercial bagged potato chips (1 bag, 50gr)	0	0	0	0	1.75	0	0	0	0	1.75	1.75	0	0	0	0	0	0	0	0	0	0	0	0	0	0	0	0	0	0	0	0	0	0	33.98	0	0	0
71200400	Potato chips, baked, plain	Homemade potato chips (1 serving or medium unit, 150gr)	0	0	0	0	1.75	0	0	0	0	1.75	1.75	0	0	0	0	0	0	0	0	0	0	0	0	0	0	0	0	0	0	0	0	0	0	18.2	0	0	0
71103010	Potato, boiled, from fresh, peel not eaten, no added fat	Roasted or boiled potatoes (1 portion or medium unit, 150gr)	0	0	0	0	0.65	0	0	0	0	0.65	0.65	0	0	0	0	0	0	0	0	0	0	0	0	0	0	0	0	0	0	0	0	0	0	0	0	0	0
75219020	Mushrooms, NS as to form, cooked	Mushrooms, chanterelles and mushrooms (portion, 200gr)	0	0	0	0	0.65	0	0	0	0	0	0	0	0.65	0	0	0	0	0	0	0	0	0	0	0	0	0	0	0	0	0	0	0	0	0	0	0	0
61119010	Orange, raw	Orange, tangerine (unit)	0.54	0.54	0	0	0	0	0	0	0	0	0	0	0	0	0	0	0	0	0	0	0	0	0	0	0	0	0	0	0	0	0	0	0	0	0	0	0
63107010	Banana, raw	Banana (unit )	0.67	0	0.67	0	0	0	0	0	0	0	0	0	0	0	0	0	0	0	0	0	0	0	0	0	0	0	0	0	0	0	0	0	0	0	0	0	0
63101000	Apple, raw	Apple or pear (unit	0.91	0	0.91	0	0	0	0	0	0	0	0	0	0	0	0	0	0	0	0	0	0	0	0	0	0	0	0	0	0	0	0	0	0	0	0	0	0
63223020	Strawberries, raw	Strawberries/strawberries (6 units, 1 dessert plate)	0.69	0.69	0	0	0	0	0	0	0	0	0	0	0	0	0	0	0	0	0	0	0	0	0	0	0	0	0	0	0	0	0	0	0	0	0	0	0
63115010	Cherries, raw	Cherries, picotas, plums (1 dessert plate)	0.61	0	0.61	0	0	0	0	0	0	0	0	0	0	0	0	0	0	0	0	0	0	0	0	0	0	0	0	0	0	0	0	0	0	0	0	0	0
63135010	Peach, raw	Peach, apricots, nectarines (unit)	0.65	0	0.65	0	0	0	0	0	0	0	0	0	0	0	0	0	0	0	0	0	0	0	0	0	0	0	0	0	0	0	0	0	0	0	0	0	0
63149010	Watermelon, raw	Watermelon (One slice, 200-250 gr)	0.67	0.67	0	0	0	0	0	0	0	0	0	0	0	0	0	0	0	0	0	0	0	0	0	0	0	0	0	0	0	0	0	0	0	0	0	0	0
63109010	Cantaloupe, raw	Melon (One slice, 200-250 gr)	0.59	0.59	0	0	0	0	0	0	0	0	0	0	0	0	0	0	0	0	0	0	0	0	0	0	0	0	0	0	0	0	0	0	0	0	0	0	0
63126500	Kiwi fruit, raw	Kiwi (1 unit, 100gr)	0.57	0.57	0	0	0	0	0	0	0	0	0	0	0	0	0	0	0	0	0	0	0	0	0	0	0	0	0	0	0	0	0	0	0	0	0	0	0
63123000	Grapes, raw	Grapes (One bunch, one dessert plate)	0.67	0	0.67	0	0	0	0	0	0	0	0	0	0	0	0	0	0	0	0	0	0	0	0	0	0	0	0	0	0	0	0	0	0	0	0	0	0
75510010	Olives, green	Olives (10 units)	0	0	0	0	0.74	0	0	0	0	0	0	0	0.74	0	0	0	0	0	0	0	0	0	0	0	0	0	0	0	0	0	0	0	0	9.4	0	0	0
63105010	Avocado, raw	Avocado (unit)	0	0	0	0	0.69	0	0	0	0	0	0	0	0.69	0	0	0	0	0	0	0	0	0	0	0	0	0	0	0	0	0	0	0	0	13.16	0	0	0
63311140	Fruit cocktail, canned, in syrup	Fruits in syrup or juice (2 units)	0.26	0	0.26	0	0	0	0	0	0	0	0	0	0	0	0	0	0	0	0	0	0	0	0	0	0	0	0	0	0	0	0	0	0	0	0	1.76	0
62110100	Date	Dates, dried figs, raisins, prunes (150gr)	1.33	0	1.33	0	0	0	0	0	0	0	0	0	0	0	0	0	0	0	0	0	0	0	0	0	0	0	0	0	0	0	0	0	0	0	0	0	0
42100100	Almonds, NFS	Almonds, peanuts, hazelnuts, pistachios, pine nuts (a handful, 30gr)	0	0	0	0	0	0	0	0	0	0	0	0	0	0	0	0	0	7.05	0	0	0	0	0	0	0	0	0	7.05	0	0	0	0	0	33.99	0	0	0
42116000	Walnuts, excluding honey roasted	Walnuts (4 peeled walnuts, 30gr)	0	0	0	0	0	0	0	0	0	0	0	0	0	0	0	0	0	7.05	0	0	0	0	0	0	0	0	0	7.05	0	0	0	0	0	46.66	0	0	0
41304970	Lentils, NFS	Lentils (serving, 150g cooked or 80g raw)	0	0	0	0	0	0	0	0	0	0	0	0	0	0.57	0	0	0	0	0	0	0	0	0	0	0	0	0	0	2.29	0	0	0	0	0	0	0	0
41301990	Chickpeas, NFS	Chickpeas (serving, 150g cooked or 80g raw)	0	0	0	0	0	0	0	0	0	0	0	0	0	0.57	0	0	0	0	0	0	0	0	0	0	0	0	0	0	2.29	0	0	0	0	0	0	0	0
41303000	Split peas, from dried, no added fat	Peas (serving, 150g cooked or 80g raw)	0	0	0	0	0	0	0	0	0	0	0	0	0	0.57	0	0	0	0	0	0	0	0	0	0	0	0	0	0	2.29	0	0	0	0	0	0	0	0
41100990	Beans, NFS	Beans (portion, 150g cooked or 80g raw)	0	0	0	0	0	0	0	0	0	0	0	0	0	0.57	0	0	0	0	0	0	0	0	0	0	0	0	0	0	2.29	0	0	0	0	0	0	0	0
51101000	Bread, white	White bread, sliced bread (3 slices, 75gr)	0	0	0	0	0	0	0	0	0	0	0	0	0	0	3.39	0	3.39	0	0	0	0	0	0	0	0	0	0	0	0	0	0	0	0	2.37	0	0.9	0
51300110	Bread, whole wheat	Whole bread (3 slices, 75gr)	0	0	0	0	0	0	0	0	0	0	0	0	0	0	3.63	3.63	0	0	0	0	0	0	0	0	0	0	0	0	0	0	0	0	0	2.4	0	1.05	0
57100100	Cereal, ready-to-eat, NFS	Breakfast cereals (2 tablespoons, 30gr)	0	0	0	0	0	0	0	0	0	0	0	0	0	0	2.71	2.12	0.59	0	0	0	0	0	0	0	0	0	0	0	0	0	0	0	0	0.18	0	4.79	0
57207000	Cereal, bran flakes	Cereals whole grains (muesli, oat flakes, all-bran) (2 tablespoons, 30gr)	0	0	0	0	0	0	0	0	0	0	0	0	0	0	2.81	1.61	1.2	0	0	0	0	0	0	0	0	0	0	0	0	0	0	0	0	0	0.7	3.8	0
56205000	Rice, cooked, NFS	Ice or noddles (serving, 60 gr raw)	0	0	0	0	0	0	0	0	0	0	0	0	0	0	1.22	0	1.22	0	0	0	0	0	0	0	0	0	0	0	0	0	0	0	0	0	0	0	0
56130000	Pasta, cooked	Pasta (noodles, macaroni, spaghetti) (serving, 60 gr raw)	0	0	0	0	0	0	0	0	0	0	0	0	0	0	1.4	0	1.4	0	0	0	0	0	0	0	0	0	0	0	0	0	0	0	0	0	0	0	0
58106750	Pizza with meat and fruit, thin crust	Pizza (portion, 200gr)	0.08	0	0.08	0	0.09	0	0.09	0.09	0	0	0	0	0	0	1.31	0	1.31	0.44	0.44	0	0.44	0	0	0	0	0	0	0	0	0.49	0	0	0.49	4.82	3.54	0.19	0
82104000	Olive oil	Olive oil (one tablespoon)	0	0	0	0	0	0	0	0	0	0	0	0	0	0	0	0	0	0	0	0	0	0	0	0	0	0	0	0	0	0	0	0	0	100	0	0	0
82104000	Olive oil	Extra virgin olive oil (One tablespoon)	0	0	0	0	0	0	0	0	0	0	0	0	0	0	0	0	0	0	0	0	0	0	0	0	0	0	0	0	0	0	0	0	0	100	0	0	0
82102000	Corn oil	Corn oil (one tablespoon)	0	0	0	0	0	0	0	0	0	0	0	0	0	0	0	0	0	0	0	0	0	0	0	0	0	0	0	0	0	0	0	0	0	100	0	0	0
82108500	Sunflower oil	Sunflower oil (one tablespoon)	0	0	0	0	0	0	0	0	0	0	0	0	0	0	0	0	0	0	0	0	0	0	0	0	0	0	0	0	0	0	0	0	0	100	0	0	0
82108000	Soybean oil	Soybean oil (one tablespoon)	0	0	0	0	0	0	0	0	0	0	0	0	0	0	0	0	0	0	0	0	0	0	0	0	0	0	0	0	0	0	0	0	0	100	0	0	0
81102000	Margarine, NFS	Margarine (individual portion, 12gr)	0	0	0	0	0	0	0	0	0	0	0	0	0	0	0	0	0	0	0	0	0	0	0	0	0	0	0	0	0	0	0	0	0	32.52	32.52	0	0
81100500	Butter, NFS	Butter (individual portion, 12gr)	0	0	0	0	0	0	0	0	0	0	0	0	0	0	0	0	0	0	0	0	0	0	0	0	0	0	0	0	0	0	0	0	0	0	81.11	0	0
81202000	Lard	Lard (dessert tablespoon, 10gr)	0	0	0	0	0	0	0	0	0	0	0	0	0	0	0	0	0	0	0	0	0	0	0	0	0	0	0	0	0	0	0	0	0	0	100	0	0
53241510	Marie biscuit	Maria type cookies (4 -6 units, 50gr)	0	0	0	0	0	0	0	0	0	0	0	0	0	0	4	0	4	0	0	0	0	0	0	0	0	0	0	0	0	0.08	0	0	0	0	9.75	4.4	0
53231400	Cookie, multigrain, high fiber	Whole grain or fiber biscuits (4-6 units, 50gr)	0.03	0	0.03	0	0	0	0	0	0	0	0	0	0	0	1.93	1.93	0	0	0	0	0	0	0	0	0	0	0	0	0	0	0	0	0	5.99	7.23	6.09	0
53207000	Cookie, chocolate or fudge	Chocolate biscuits (4 units, 50gr)	0	0	0	0	0	0	0	0	0	0	0	0	0	0	2.69	0	2.69	0	0	0	0	0	0	0	0	0	0	0	0	0	0	0	0	5	8.34	8.55	0
53206020	Cookie, chocolate chip, made from home recipe or purchased at a bakery	Homemade pastries and biscuits (Unit, 50gr)	0	0	0	0	0	0	0	0	0	0	0	0	0	0	1.2	0	1.2	1	0	0	0	0	0	0	0	0.14	0	0.86	0	0	0	0	0	5.72	19.53	9.67	0
51166000	Croissant	Croissant, ensaimadas, tea cakes or other industrial pastries (unit, 50gr)	0	0	0	0	0	0	0	0	0	0	0	0	0	0	2.81	0	2.81	0.33	0	0	0	0	0	0	0	0.33	0	0	0	0.06	0.06	0	0	0	18.51	2.38	0
53520000	Doughnut, NFS	Donuts (unit)	0	0	0	0	0	0	0	0	0	0	0	0	0	0	2.13	0	2.13	0.04	0	0	0	0	0	0	0	0.04	0	0	0	0.07	0.03	0	0	0	21.12	4.86	0
53100100	Cake or cupcake, NS as to type	Cupcakes (1-2 units)	0	0	0	0	0	0	0	0	0	0	0	0	0	0	0.84	0	0.84	0.1	0	0	0	0	0	0	0	0.1	0	0	0	0.03	0.03	0	0	9.5	10.43	9.27	0
53100100	Cake or cupcake, NS as to type	Cakes (one, 50gr)	0	0	0	0	0	0	0	0	0	0	0	0	0	0	0.84	0	0.84	0.1	0	0	0	0	0	0	0	0.1	0	0	0	0.03	0.03	0	0	9.5	10.43	9.27	0
53520200	Churros	Churros, batons (1 portion, 100gr)	0	0	0	0	0	0	0	0	0	0	0	0	0	0	2.17	0	2.17	0.03	0	0	0	0	0	0	0	0.03	0	0	0	0.1	0.06	0	0	0	20.72	4.94	0
91705010	Milk chocolate candy, plain	Chocolates(30gr) and bonbons(2 units)	0	0	0	0	0	0	0	0	0	0	0	0	0	0	0	0	0	0	0	0	0	0	0	0	0	0	0	0	0	0.16	0.16	0	0	0	28.29	10.46	0
11830150	Cocoa powder, not reconstituted	Cocoa powder or soluble (nesquik, colacao, etc) (dessert spoon)	0	0	0	0	0	0	0	0	0	0	0	0	0	0	0	0	0	0	0	0	0	0	0	0	0	0	0	0	0	0	0	0	0	0	13.7	0	0
91728000	Nut roll, fudge or nougat, caramel and nuts	Nougat(1/8 of bar, 40gr)	0	0	0	0	0	0	0	0	0	0	0	0	0	0	0	0	0	3.29	0	0	0	0	0	0	0	0.04	0	3.25	0	0.02	0.02	0	0	15.62	1.5	8.96	0
53239000	Cookie, shortbread	Mantecados, marzipan (90gr)	0	0	0	0	0	0	0	0	0	0	0	0	0	0	3.33	0	3.33	0	0	0	0	0	0	0	0	0	0	0	0	0	0	0	0	6.13	18.38	4.99	0
27220080	Ham croquette	Croquettes, fritters, pasties, pre-cooked (one)	0	0	0	0	0.02	0	0	0	0	0	0	0	0.02	0	0.13	0	0.13	2.59	2.38	0	2.38	0	0	0	0	0.21	0	0	0	0	0	0	0	12.94	0.78	0	0
75649010	Vegetable soup, canned, prepared with water or ready-to-serve	Soups and creams in packets (1 plate)	0	0	0	0	0.27	0	0.15	0.06	0.09	0.05	0.04	0.01	0.07	0.04	0	0	0	0	0	0	0	0	0	0	0	0	0	0	0.15	0	0	0	0	0	0.36	0	0
75506010	Mustard	Mustard (dessert teaspoon)	0	0	0	0	0	0	0	0	0	0	0	0	0	0	0	0	0	0	0	0	0	0	0	0	0	0	0	0	0	0	0	0	0	0	0	0	0
83107000	Mayonnaise, regular	Commercial mayonnaise (dessert teaspoon )	0	0	0	0	0	0	0	0	0	0	0	0	0	0	0	0	0	0.15	0	0	0	0	0	0	0	0.15	0	0	0	0	0	0	0	73	0.43	0	0
74401010	Ketchup	Fried tomato sauce, ketchup (1 teaspoon)	0	0	0	0	0.58	0	0.58	0.58	0	0	0	0	0	0	0	0	0	0	0	0	0	0	0	0	0	0	0	0	0	0	0	0	0	0	0	4.47	0
75511010	Hot pepper sauce	Spicy: Tabasco, pepper or paprika (a pinch)	0	0	0	0	0.25	0	0.25	0	0.25	0	0	0	0	0	0	0	0	0	0	0	0	0	0	0	0	0	0	0	0	0	0	0	0	0	0	0	0
		Salt (a pinch)	0	0	0	0	0	0	0	0	0	0	0	0	0	0	0	0	0	0	0	0	0	0	0	0	0	0	0	0	0	0	0	0	0	0	0	0	0
91402000	Jam, preserve, all flavors	Jams (1 dessert teaspoon)	0.28	0.15	0.13	0	0	0	0	0	0	0	0	0	0	0	0	0	0	0	0	0	0	0	0	0	0	0	0	0	0	0	0	0	0	0	0	11.55	0
91101000	Sugar, NFS	Sugar (1 dessert teaspoon)	0	0	0	0	0	0	0	0	0	0	0	0	0	0	0	0	0	0	0	0	0	0	0	0	0	0	0	0	0	0	0	0	0	0	0	23.76	0
91302010	Honey	Honey (a teaspoon of dessert)	0	0	0	0	0	0	0	0	0	0	0	0	0	0	0	0	0	0	0	0	0	0	0	0	0	0	0	0	0	0	0	0	0	0	0	19.55	0
54403001	Popcorn, NFS	Snacks other than chips: worms, popcorn, corn, etc. (1 bag, 50gr)	0	0	0	0	0	0	0	0	0	0	0	0	0	0	2.59	2.59	0	0	0	0	0	0	0	0	0	0	0	0	0	0	0	0	0	0	26.53	0	0
92410310	Soft drink, cola	Carbonated drinks with sugar: Coca-Cola, Fanta, lemonade, tonic (1 bottle, 200ml)	0	0	0	0	0	0	0	0	0	0	0	0	0	0	0	0	0	0	0	0	0	0	0	0	0	0	0	0	0	0	0	0	0	0	0	2.37	0
92410320	Soft drink, cola, diet	Low-calorie carbonated drinks: Light or zero (1 bottle, 200ml)	0	0	0	0	0	0	0	0	0	0	0	0	0	0	0	0	0	0	0	0	0	0	0	0	0	0	0	0	0	0	0	0	0	0	0	0	0
61210000	Orange juice, 100%, NFS	Natural orange juice (1 glass, 200ml)	0.4	0	0	0.4	0	0	0	0	0	0	0	0	0	0	0	0	0	0	0	0	0	0	0	0	0	0	0	0	0	0	0	0	0	0	0	0	0
64100110	Fruit juice blend, 100% juice	Natural juices from other fruits (1 glass, 200ml)	0.4	0	0	0.4	0	0	0	0	0	0	0	0	0	0	0	0	0	0	0	0	0	0	0	0	0	0	0	0	0	0	0	0	0	0	0	0	0
92530410	Fruit flavored drink, with high vitamin C	Orange juices commercial fruits (unit)	0.01	0	0	0.01	0	0	0	0	0	0	0	0	0	0	0	0	0	0	0	0	0	0	0	0	0	0	0	0	0	0	0	0	0	0	0	1.19	0
92101500	Coffee, brewed, blend of regular and decaffeinated	Decaffeinated coffee (1 cup, 50ml)	0	0	0	0	0	0	0	0	0	0	0	0	0	0	0	0	0	0	0	0	0	0	0	0	0	0	0	0	0	0	0	0	0	0	0	0	0
92101000	Coffee, brewed	Coffee (1 cup, 50ml)	0	0	0	0	0	0	0	0	0	0	0	0	0	0	0	0	0	0	0	0	0	0	0	0	0	0	0	0	0	0	0	0	0	0	0	0	0
92302000	Tea, hot, leaf, black	Tea (1 cup, 50ml)	0	0	0	0	0	0	0	0	0	0	0	0	0	0	0	0	0	0	0	0	0	0	0	0	0	0	0	0	0	0	0	0	0	0	0	0	0
64116020	Grape juice, 100%	Must (large glass, 100ml)	0.4	0	0	0.4	0	0	0	0	0	0	0	0	0	0	0	0	0	0	0	0	0	0	0	0	0	0	0	0	0	0	0	0	0	0	0	0	0
93401030	Wine, table, rose	Rosé wine (large glass, 100ml)	0	0	0	0	0	0	0	0	0	0	0	0	0	0	0	0	0	0	0	0	0	0	0	0	0	0	0	0	0	0	0	0	0	0	0	0	0.69
93401010	Wine, table, red	Young red wine (large glass, 100ml)	0	0	0	0	0	0	0	0	0	0	0	0	0	0	0	0	0	0	0	0	0	0	0	0	0	0	0	0	0	0	0	0	0	0	0	0	0.76
93401010	Wine, table, red	Aged red wine (large glass, 100ml)	0	0	0	0	0	0	0	0	0	0	0	0	0	0	0	0	0	0	0	0	0	0	0	0	0	0	0	0	0	0	0	0	0	0	0	0	0.76
93401020	Wine, table, white	White wine (large glass, 100ml)	0	0	0	0	0	0	0	0	0	0	0	0	0	0	0	0	0	0	0	0	0	0	0	0	0	0	0	0	0	0	0	0	0	0	0	0	0.74
93402000	Wine, dessert, sweet	Muscatel wine (glass, 50ml)	0	0	0	0	0	0	0	0	0	0	0	0	0	0	0	0	0	0	0	0	0	0	0	0	0	0	0	0	0	0	0	0	0	0	0	0	1.09
93401020	Wine, table, white	Cava (large glass, 100ml)	0	0	0	0	0	0	0	0	0	0	0	0	0	0	0	0	0	0	0	0	0	0	0	0	0	0	0	0	0	0	0	0	0	0	0	0	0.74
93101000	Beer	Beer (1 jug,330ml)	0	0	0	0	0	0	0	0	0	0	0	0	0	0	0	0	0	0	0	0	0	0	0	0	0	0	0	0	0	0	0	0	0	0	0	0	0.28
93201000	Cordial or liqueur	Spirits, aniseed, anisette (glass,50ml)	0	0	0	0	0	0	0	0	0	0	0	0	0	0	0	0	0	0	0	0	0	0	0	0	0	0	0	0	0	0	0	0	0	0	0	9.9	2.13
93505000	Vodka	Spirits: vodka, whiskey, gin (glass,50ml)	0	0	0	0	0	0	0	0	0	0	0	0	0	0	0	0	0	0	0	0	0	0	0	0	0	0	0	0	0	0	0	0	0	0	0	0	2.39
